# Supplementary material for: Development of Activity Rules and Chemical Fragment Design for In Silico Discovery of AChE and BACE1 Dual Inhibitors against Alzheimer’s Disease
Source: MDPI journal article supplement (doi:10.3390/molecules28083588), 2023-04-20
Supplement: s1 [file s1]

# Development of activity rules and chemical fragment design for in silico discovery of AChE and BACE1 dual inhibitors against Alzheimer's disease

Le-Quang Bao<sup>1</sup>, Daniel Baecker<sup>2</sup>, Do Thi Mai Dung<sup>1</sup>, Nguyen Phuong Nhung<sup>1</sup>, Nguyen Thi Thuan<sup>1</sup>, Phuong Linh Nguyen<sup>3</sup>, Phan Thi Phuong Dung<sup>1</sup>, Tran Thi Lan Huong<sup>1</sup>, Bakhtiyor Rasulev<sup>4</sup>, Gerardo M. Casanola-Martin<sup>4</sup>, Nguyen-Hai Nam<sup>1,\*</sup> and Hai Pham-The<sup>1,\*</sup>

<sup>1</sup> Hanoi University of Pharmacy, 13-15 Le Thanh Tong, Hoan Kiem, Hanoi 10000, Vietnam

<sup>2</sup> Department of Pharmaceutical and Medicinal Chemistry, Institute of Pharmacy, University of Greifswald, Friedrich-Ludwig-Jahn-Straße 17, 17489 Greifswald, Germany

<sup>3</sup> Drexel University, 3141 Chestnut St. Philadelphia, PA 19104, USA

<sup>4</sup> Department of Coatings and Polymeric Materials, North Dakota State University, Fargo, ND 58102, USA

\* Correspondence: haipham@hup.edu.vn (H. P-T.); namnh@hup.edu.vn (N-H. N.)

## Supplementary materials:

**Table S1.** Molecule ChEMBL ID (<https://www.ebi.ac.uk/chembl/>) and labels of 1975 compounds in AChE database

| Molecule<br>ChEMBL ID | logIC <sub>50</sub><br>(nM) | Label    | Molecule<br>ChEMBL ID | logIC <sub>50</sub><br>(nM) | Label    | Molecule<br>ChEMBL ID | logIC <sub>50</sub><br>(nM) | Label    |
|-----------------------|-----------------------------|----------|-----------------------|-----------------------------|----------|-----------------------|-----------------------------|----------|
| CHEMBL371787          | 3.272                       | Inactive | CHEMBL3752926         | 1.645                       | Active   | CHEMBL3758282         | 3.851                       | Inactive |
| CHEMBL372202          | -1.398                      | Active   | CHEMBL4088659         | 4.093                       | Inactive | CHEMBL3338388         | 2.041                       | Inactive |
| CHEMBL1256415         | 4.176                       | Inactive | CHEMBL3133432         | 3.053                       | Inactive | CHEMBL3322142         | 1.974                       | Active   |
| CHEMBL433041          | 4.342                       | Inactive | CHEMBL3597000         | 3.470                       | Inactive | CHEMBL3322159         | 2.442                       | Inactive |
| CHEMBL95              | 1.886                       | Active   | CHEMBL3597002         | 3.758                       | Inactive | CHEMBL3338387         | 3.336                       | Inactive |
| CHEMBL186264          | 0.845                       | Active   | CHEMBL3597010         | 3.663                       | Inactive | CHEMBL3597005         | 3.394                       | Inactive |
| CHEMBL188714          | 1.732                       | Active   | CHEMBL278020          | 3.380                       | Inactive | CHEMBL25629           | 4.544                       | Inactive |
| CHEMBL594229          | 3.212                       | Inactive | CHEMBL3338998         | 4.703                       | Inactive | CHEMBL1782707         | 5.000                       | Inactive |
| CHEMBL218939          | 2.079                       | Inactive | CHEMBL3339002         | 4.470                       | Inactive | CHEMBL1783531         | 3.478                       | Inactive |
| CHEMBL187870          | 1.307                       | Active   | CHEMBL659             | 2.740                       | Inactive | CHEMBL3764305         | 2.785                       | Inactive |
| CHEMBL130458          | 1.602                       | Active   | CHEMBL194823          | -0.597                      | Active   | CHEMBL4086248         | 3.857                       | Inactive |
| CHEMBL636             | 3.618                       | Inactive | CHEMBL2160222         | 5.000                       | Inactive | CHEMBL4072914         | 3.825                       | Inactive |
| CHEMBL1243203         | 2.519                       | Inactive | CHEMBL219264          | 0.924                       | Active   | CHEMBL363557          | 2.594                       | Inactive |
| CHEMBL450990          | 1.838                       | Active   | CHEMBL502             | 1.360                       | Active   | CHEMBL206093          | 1.556                       | Active   |
| CHEMBL450506          | 3.738                       | Inactive | CHEMBL3356532         | 0.286                       | Active   | CHEMBL426674          | 1.301                       | Active   |
| CHEMBL2380671         | 3.706                       | Inactive | CHEMBL2234518         | 4.250                       | Inactive | CHEMBL2332536         | 4.072                       | Inactive |
| CHEMBL449941          | 1.860                       | Active   | CHEMBL3356528         | 3.403                       | Inactive | CHEMBL156016          | 4.247                       | Inactive |
| CHEMBL452339          | 0.149                       | Active   | CHEMBL252379          | 3.110                       | Inactive | CHEMBL73593           | 2.220                       | Inactive |
| CHEMBL1940612         | 0.988                       | Active   | CHEMBL399040          | 3.080                       | Inactive | CHEMBL1651138         | 2.540                       | Inactive |
| CHEMBL92460           | 1.740                       | Active   | CHEMBL3356950         | 2.908                       | Inactive | CHEMBL93241           | 2.950                       | Inactive |
| CHEMBL131219          | 0.602                       | Active   | CHEMBL3356951         | 0.507                       | Active   | CHEMBL3343711         | 2.479                       | Inactive |
| CHEMBL2234845         | 3.540                       | Inactive | CHEMBL3343925         | 2.173                       | Inactive | CHEMBL3355580         | 1.262                       | Active   |
| CHEMBL1087194         | 2.892                       | Inactive | CHEMBL2234536         | 2.340                       | Inactive | CHEMBL3355579         | 0.826                       | Active   |
| CHEMBL1819170         | 1.648                       | Active   | CHEMBL2234535         | 2.360                       | Inactive | CHEMBL3133439         | 3.265                       | Inactive |
| CHEMBL1819171         | 1.217                       | Active   | CHEMBL376186          | 3.338                       | Inactive | CHEMBL3087680         | 3.461                       | Inactive |
| CHEMBL1819176         | 0.021                       | Active   | CHEMBL390737          | 3.461                       | Inactive | CHEMBL3417001         | 0.929                       | Active   |
| CHEMBL365136          | 3.694                       | Inactive | CHEMBL2413560         | 3.013                       | Inactive | CHEMBL3417299         | 1.387                       | Active   |
| CHEMBL1783515         | 0.954                       | Active   | CHEMBL202661          | -0.060                      | Active   | CHEMBL3786666         | 4.130                       | Inactive |
| CHEMBL188325          | 2.716                       | Inactive | CHEMBL3289929         | 4.743                       | Inactive | CHEMBL1940614         | 1.462                       | Active   |
| CHEMBL363588          | 3.992                       | Inactive | CHEMBL3289943         | 4.596                       | Inactive | CHEMBL3785269         | 1.081                       | Active   |
| CHEMBL3884690         | 0.792                       | Active   | CHEMBL489354          | 3.265                       | Inactive | CHEMBL54727           | 1.380                       | Active   |
| CHEMBL92736           | 0.447                       | Active   | CHEMBL19224           | 4.386                       | Inactive | CHEMBL3919289         | 4.000                       | Inactive |
| CHEMBL3819036         | 3.809                       | Inactive | CHEMBL375077          | 4.072                       | Inactive | CHEMBL3957099         | 3.806                       | Inactive |

Table S1. (Cont.)

| Molecule<br>ChEMBL ID | logIC <sub>50</sub><br>(nM) | Label    | Molecule<br>ChEMBL ID | logIC <sub>50</sub><br>(nM) | Label    | Molecule<br>ChEMBL ID | logIC <sub>50</sub><br>(nM) | Label    |
|-----------------------|-----------------------------|----------|-----------------------|-----------------------------|----------|-----------------------|-----------------------------|----------|
| CHEMBL3623548         | 2.083                       | Inactive | CHEMBL3116290         | 4.959                       | Inactive | CHEMBL3936989         | 3.941                       | Inactive |
| CHEMBL3623560         | 3.990                       | Inactive | CHEMBL3945872         | 3.777                       | Inactive | CHEMBL1819178         | 2.491                       | Inactive |
| CHEMBL3623551         | 0.356                       | Active   | CHEMBL3892044         | 3.049                       | Inactive | CHEMBL219569          | 0.752                       | Active   |
| CHEMBL1196495         | 1.480                       | Active   | CHEMBL3410955         | 2.839                       | Inactive | CHEMBL3133442         | 3.387                       | Inactive |
| CHEMBL1651136         | 1.810                       | Active   | CHEMBL3931517         | 4.633                       | Inactive | CHEMBL3597057         | 2.591                       | Inactive |
| CHEMBL1651137         | 2.100                       | Inactive | CHEMBL3600552         | 0.539                       | Active   | CHEMBL1085505         | 4.294                       | Inactive |
| CHEMBL92629           | 2.510                       | Inactive | CHEMBL3600556         | 0.563                       | Active   | CHEMBL3770978         | 3.708                       | Inactive |
| CHEMBL1083661         | 1.810                       | Active   | CHEMBL4066365         | 3.903                       | Inactive | CHEMBL3770569         | 3.732                       | Inactive |
| CHEMBL172118          | 3.040                       | Inactive | CHEMBL499825          | 3.619                       | Inactive | CHEMBL3786937         | 2.121                       | Inactive |
| CHEMBL92958           | 2.079                       | Inactive | CHEMBL3582223         | 2.509                       | Inactive | CHEMBL3086276         | 1.987                       | Active   |
| CHEMBL95020           | 0.556                       | Active   | CHEMBL3582224         | 2.695                       | Inactive | CHEMBL3087676         | 4.188                       | Inactive |
| CHEMBL361869          | 1.633                       | Active   | CHEMBL3582225         | 2.653                       | Inactive | CHEMBL92663           | -0.097                      | Active   |
| CHEMBL2237995         | 2.949                       | Inactive | CHEMBL2396913         | 4.949                       | Inactive | CHEMBL3322140         | 2.367                       | Inactive |
| CHEMBL362350          | 2.531                       | Inactive | CHEMBL468001          | 2.568                       | Inactive | CHEMBL2381401         | 3.246                       | Inactive |
| CHEMBL398628          | 2.939                       | Inactive | CHEMBL3582206         | 2.705                       | Inactive | CHEMBL3343929         | 2.307                       | Inactive |
| CHEMBL2332981         | 4.314                       | Inactive | CHEMBL3582211         | 4.124                       | Inactive | CHEMBL2380670         | 4.162                       | Inactive |
| CHEMBL2332540         | 4.374                       | Inactive | CHEMBL3582230         | 3.084                       | Inactive | CHEMBL3623559         | 2.387                       | Inactive |
| CHEMBL2332530         | 4.292                       | Inactive | CHEMBL2179375         | 3.477                       | Inactive | CHEMBL1783523         | 1.633                       | Active   |
| CHEMBL2332532         | 4.425                       | Inactive | CHEMBL167911          | 3.364                       | Inactive | CHEMBL1783519         | 1.845                       | Active   |
| CHEMBL2332542         | 4.057                       | Inactive | CHEMBL189122          | 0.797                       | Active   | CHEMBL575813          | 2.267                       | Inactive |
| CHEMBL31574           | 1.079                       | Active   | CHEMBL187818          | 0.415                       | Active   | CHEMBL3948367         | 3.906                       | Inactive |
| CHEMBL3133434         | 2.940                       | Inactive | CHEMBL187330          | 3.410                       | Inactive | CHEMBL406645          | 4.220                       | Inactive |
| CHEMBL3133444         | 3.963                       | Inactive | CHEMBL3623563         | 4.228                       | Inactive | CHEMBL3112614         | 3.712                       | Inactive |
| CHEMBL239046          | 0.855                       | Active   | CHEMBL223256          | 3.857                       | Inactive | CHEMBL3115024         | 4.022                       | Inactive |
| CHEMBL3922423         | 1.519                       | Active   | CHEMBL490359          | 1.556                       | Active   | CHEMBL3115021         | 3.158                       | Inactive |
| CHEMBL3597009         | 3.352                       | Inactive | CHEMBL329531          | 2.530                       | Inactive | CHEMBL3115042         | 3.709                       | Inactive |
| CHEMBL2380677         | 4.349                       | Inactive | CHEMBL1819180         | 2.658                       | Inactive | CHEMBL3115041         | 3.613                       | Inactive |
| CHEMBL2380674         | 3.522                       | Inactive | CHEMBL3751941         | 1.672                       | Active   | CHEMBL3263733         | 3.322                       | Inactive |
| CHEMBL2380669         | 4.049                       | Inactive | CHEMBL2238002         | 3.886                       | Inactive | CHEMBL3263736         | 3.580                       | Inactive |
| CHEMBL1912059         | -0.638                      | Active   | CHEMBL4075825         | 4.274                       | Inactive | CHEMBL3353566         | 4.799                       | Inactive |
| CHEMBL2375480         | 3.250                       | Inactive | CHEMBL448799          | 4.176                       | Inactive | CHEMBL2413744         | 3.988                       | Inactive |
| CHEMBL129837          | 2.875                       | Inactive | CHEMBL127857          | 1.467                       | Active   | CHEMBL3087677         | 4.013                       | Inactive |
| CHEMBL2234533         | 2.510                       | Inactive | CHEMBL3290190         | 3.444                       | Inactive | CHEMBL231160          | 0.176                       | Active   |
| CHEMBL2234525         | 1.900                       | Active   | CHEMBL1783514         | 0.477                       | Active   | CHEMBL3322141         | 1.420                       | Active   |
| CHEMBL2234524         | 4.610                       | Inactive | CHEMBL3623558         | 1.459                       | Active   | CHEMBL3323051         | 4.752                       | Inactive |
| CHEMBL2234519         | 4.080                       | Inactive | CHEMBL540178          | 3.970                       | Inactive | CHEMBL491561          | 2.354                       | Inactive |
| CHEMBL2234511         | 3.280                       | Inactive | CHEMBL470867          | 2.732                       | Inactive | CHEMBL582883          | 1.954                       | Active   |
| CHEMBL2234838         | 3.660                       | Inactive | CHEMBL3754146         | 2.619                       | Inactive | CHEMBL599644          | 1.716                       | Active   |
| CHEMBL2234832         | 3.930                       | Inactive | CHEMBL368196          | 1.625                       | Active   | CHEMBL604096          | 2.255                       | Inactive |
| CHEMBL2234546         | 2.940                       | Inactive | CHEMBL3116278         | 3.851                       | Inactive | CHEMBL474836          | 3.322                       | Inactive |
| CHEMBL398249          | 4.080                       | Inactive | CHEMBL3086277         | 2.364                       | Inactive | CHEMBL2380672         | 4.470                       | Inactive |
| CHEMBL252781          | 3.080                       | Inactive | CHEMBL3769833         | 3.792                       | Inactive | CHEMBL382260          | -0.187                      | Active   |
| CHEMBL1766150         | 4.299                       | Inactive | CHEMBL2011402         | 4.504                       | Inactive | CHEMBL381499          | -1.000                      | Active   |
| CHEMBL4069096         | 4.649                       | Inactive | CHEMBL197696          | 1.146                       | Active   | CHEMBL374184          | 2.041                       | Inactive |
| CHEMBL3787223         | 1.230                       | Active   | CHEMBL3823538         | 4.130                       | Inactive | CHEMBL597795          | 3.731                       | Inactive |
| CHEMBL3785207         | 2.014                       | Inactive | CHEMBL3770356         | 3.763                       | Inactive | CHEMBL592857          | 3.699                       | Inactive |
| CHEMBL2047228         | 4.111                       | Inactive | CHEMBL3770803         | 3.813                       | Inactive | CHEMBL591470          | 4.845                       | Inactive |
| CHEMBL3819024         | 4.487                       | Inactive | CHEMBL1834065         | 4.706                       | Inactive | CHEMBL1255901         | 1.079                       | Active   |
| CHEMBL4065259         | 4.072                       | Inactive | CHEMBL3323059         | 2.352                       | Inactive | CHEMBL555300          | 4.041                       | Inactive |
| CHEMBL4085482         | 4.779                       | Inactive | CHEMBL3323046         | 2.728                       | Inactive | CHEMBL219172          | 2.279                       | Inactive |

Table S1. (Cont.)

| Molecule<br>ChEMBL ID | logIC <sub>50</sub><br>(nM) | Label    | Molecule<br>ChEMBL ID | logIC <sub>50</sub><br>(nM) | Label    | Molecule<br>ChEMBL ID | logIC <sub>50</sub><br>(nM) | Label    |
|-----------------------|-----------------------------|----------|-----------------------|-----------------------------|----------|-----------------------|-----------------------------|----------|
| CHEMBL1940619         | 4.387                       | Inactive | CHEMBL224981          | 3.365                       | Inactive | CHEMBL244762          | 2.097                       | Inactive |
| CHEMBL1243269         | 3.995                       | Inactive | CHEMBL194372          | 2.004                       | Inactive | CHEMBL390247          | 1.781                       | Active   |
| CHEMBL519475          | 2.097                       | Inactive | CHEMBL374130          | 4.961                       | Inactive | CHEMBL276444          | 2.158                       | Inactive |
| CHEMBL362711          | 2.041                       | Inactive | CHEMBL24686           | 0.903                       | Active   | CHEMBL243056          | 0.484                       | Active   |
| CHEMBL3770071         | 3.806                       | Inactive | CHEMBL32823           | -0.229                      | Active   | CHEMBL373651          | 3.255                       | Inactive |
| CHEMBL3770206         | 3.663                       | Inactive | CHEMBL3338999         | 4.810                       | Inactive | CHEMBL1922540         | 4.813                       | Inactive |
| CHEMBL3883432         | 0.114                       | Active   | CHEMBL3263735         | 3.732                       | Inactive | CHEMBL186144          | 0.903                       | Active   |
| CHEMBL2160225         | 4.591                       | Inactive | CHEMBL3356534         | 1.393                       | Active   | CHEMBL473866          | 0.188                       | Active   |
| CHEMBL3289935         | 3.188                       | Inactive | CHEMBL3356536         | -0.143                      | Active   | CHEMBL1940617         | 4.810                       | Inactive |
| CHEMBL178792          | 3.633                       | Inactive | CHEMBL497755          | 4.513                       | Inactive | CHEMBL592624          | 3.845                       | Inactive |
| CHEMBL3263726         | 3.785                       | Inactive | CHEMBL1651132         | 0.110                       | Active   | CHEMBL254016          | 0.519                       | Active   |
| CHEMBL338755          | -0.523                      | Active   | CHEMBL420625          | 1.300                       | Active   | CHEMBL238063          | 3.640                       | Inactive |
| CHEMBL242989          | 2.130                       | Inactive | CHEMBL434378          | 1.260                       | Active   | CHEMBL393212          | 2.423                       | Inactive |
| CHEMBL195418          | 0.477                       | Active   | CHEMBL1290152         | 3.861                       | Inactive | CHEMBL115835          | 2.429                       | Inactive |
| CHEMBL468002          | 3.447                       | Inactive | CHEMBL390083          | 3.531                       | Inactive | CHEMBL24519           | 3.898                       | Inactive |
| CHEMBL1766019         | 4.398                       | Inactive | CHEMBL502877          | 1.410                       | Active   | CHEMBL93619           | 0.851                       | Active   |
| CHEMBL363391          | 3.037                       | Inactive | CHEMBL245055          | 3.356                       | Inactive | CHEMBL243055          | 0.713                       | Active   |
| CHEMBL1912062         | 2.408                       | Inactive | CHEMBL242905          | 2.566                       | Inactive | CHEMBL391918          | 3.719                       | Inactive |
| CHEMBL2088781         | 2.380                       | Inactive | CHEMBL426441          | -0.319                      | Active   | CHEMBL3323049         | 3.623                       | Inactive |
| CHEMBL575620          | 2.566                       | Inactive | CHEMBL94              | 1.544                       | Active   | CHEMBL3323043         | 2.825                       | Inactive |
| CHEMBL1651140         | 0.940                       | Active   | CHEMBL277665          | 4.996                       | Inactive | CHEMBL1651244         | 1.200                       | Active   |
| CHEMBL359570          | -0.480                      | Active   | CHEMBL219316          | 1.771                       | Active   | CHEMBL1161714         | 1.460                       | Active   |
| CHEMBL3343931         | 1.984                       | Active   | CHEMBL355740          | 1.926                       | Active   | CHEMBL372491          | 1.447                       | Active   |
| CHEMBL576005          | 1.875                       | Active   | CHEMBL491527          | 4.435                       | Inactive | CHEMBL186090          | 2.875                       | Inactive |
| CHEMBL220905          | 3.623                       | Inactive | CHEMBL597794          | 2.041                       | Inactive | CHEMBL186042          | 0.663                       | Active   |
| CHEMBL374729          | 2.878                       | Inactive | CHEMBL329231          | -0.240                      | Active   | CHEMBL3393675         | 4.663                       | Inactive |
| CHEMBL365678          | 3.320                       | Inactive | CHEMBL595115          | 1.491                       | Active   | CHEMBL216159          | 0.719                       | Active   |
| CHEMBL417915          | 2.881                       | Inactive | CHEMBL593933          | 1.924                       | Active   | CHEMBL1618217         | 2.000                       | Inactive |
| CHEMBL3323042         | 2.334                       | Inactive | CHEMBL430403          | 2.260                       | Inactive | CHEMBL1914495         | 4.950                       | Inactive |
| CHEMBL3323065         | 2.914                       | Inactive | CHEMBL511468          | 3.149                       | Inactive | CHEMBL140476          | -0.490                      | Active   |
| CHEMBL3339000         | 4.391                       | Inactive | CHEMBL590031          | 3.477                       | Inactive | CHEMBL244838          | 3.090                       | Inactive |
| CHEMBL403260          | 1.560                       | Active   | CHEMBL340427          | -0.523                      | Active   | CHEMBL245047          | 2.854                       | Inactive |
| CHEMBL238062          | 3.492                       | Inactive | CHEMBL2047229         | 3.973                       | Inactive | CHEMBL395280          | 2.778                       | Inactive |
| CHEMBL242661          | 1.708                       | Active   | CHEMBL2047230         | 3.996                       | Inactive | CHEMBL3335048         | 2.954                       | Inactive |
| CHEMBL243270          | 1.789                       | Active   | CHEMBL2234839         | 4.110                       | Inactive | CHEMBL3343708         | 2.729                       | Inactive |
| CHEMBL230434          | 1.628                       | Active   | CHEMBL2234831         | 3.230                       | Inactive | CHEMBL3335025         | 3.447                       | Inactive |
| CHEMBL2380668         | 4.196                       | Inactive | CHEMBL2234542         | 4.230                       | Inactive | CHEMBL2413741         | 3.566                       | Inactive |
| CHEMBL2332539         | 3.941                       | Inactive | CHEMBL340625          | 0.756                       | Active   | CHEMBL128452          | 1.845                       | Active   |
| CHEMBL384563          | 1.991                       | Active   | CHEMBL1766139         | 4.185                       | Inactive | CHEMBL2234516         | 4.690                       | Inactive |
| CHEMBL386541          | 1.607                       | Active   | CHEMBL1288823         | 3.994                       | Inactive | CHEMBL2234841         | 4.520                       | Inactive |
| CHEMBL2236394         | -0.086                      | Active   | CHEMBL3310697         | 4.815                       | Inactive | CHEMBL375862          | 2.993                       | Inactive |
| CHEMBL62085           | 3.910                       | Inactive | CHEMBL3323039         | 2.303                       | Inactive | CHEMBL1770549         | 2.009                       | Inactive |
| CHEMBL1161715         | 2.210                       | Inactive | CHEMBL2419681         | 3.975                       | Inactive | CHEMBL1766017         | 4.274                       | Inactive |
| CHEMBL300143          | 1.000                       | Active   | CHEMBL3322158         | 3.464                       | Inactive | CHEMBL241830          | 4.906                       | Inactive |
| CHEMBL188917          | 2.591                       | Inactive | CHEMBL20339           | 3.778                       | Inactive | CHEMBL244415          | 3.354                       | Inactive |
| CHEMBL211520          | 2.101                       | Inactive | CHEMBL330004          | 1.699                       | Active   | CHEMBL389825          | 1.793                       | Active   |
| CHEMBL212111          | 3.031                       | Inactive | CHEMBL370807          | -0.347                      | Active   | CHEMBL245046          | 2.491                       | Inactive |
| CHEMBL431844          | 1.500                       | Active   | CHEMBL92142           | 2.342                       | Inactive | CHEMBL243130          | 2.563                       | Inactive |
| CHEMBL63173           | 4.322                       | Inactive | CHEMBL51934           | 2.215                       | Inactive | CHEMBL3582232         | 2.425                       | Inactive |
| CHEMBL225610          | 3.428                       | Inactive | CHEMBL241974          | 2.124                       | Inactive | CHEMBL376434          | 3.342                       | Inactive |

Table S1. (Cont.)

| Molecule<br>ChEMBL ID | logIC <sub>50</sub><br>(nM) | Label    | Molecule<br>ChEMBL ID | logIC <sub>50</sub><br>(nM) | Label    | Molecule<br>ChEMBL ID | logIC <sub>50</sub><br>(nM) | Label    |
|-----------------------|-----------------------------|----------|-----------------------|-----------------------------|----------|-----------------------|-----------------------------|----------|
| CHEMBL385778          | 3.114                       | Inactive | CHEMBL828             | 3.863                       | Inactive | CHEMBL243044          | 2.090                       | Inactive |
| CHEMBL1086014         | 4.365                       | Inactive | CHEMBL388714          | 3.201                       | Inactive | CHEMBL271710          | 2.515                       | Inactive |
| CHEMBL1084211         | 4.167                       | Inactive | CHEMBL396247          | 1.693                       | Active   | CHEMBL1161720         | 3.180                       | Inactive |
| CHEMBL1084210         | 3.740                       | Inactive | CHEMBL513161          | 2.826                       | Inactive | CHEMBL132030          | 1.900                       | Active   |
| CHEMBL1770550         | 4.338                       | Inactive | CHEMBL220294          | 2.281                       | Inactive | CHEMBL2071424         | 3.418                       | Inactive |
| CHEMBL1770553         | 4.342                       | Inactive | CHEMBL491358          | 1.653                       | Active   | CHEMBL2064465         | 0.696                       | Active   |
| CHEMBL2047528         | 1.874                       | Active   | CHEMBL470715          | 2.577                       | Inactive | CHEMBL238230          | 0.262                       | Active   |
| CHEMBL369661          | 1.838                       | Active   | CHEMBL3323062         | 3.176                       | Inactive | CHEMBL3632858         | 0.833                       | Active   |
| CHEMBL2375483         | 2.537                       | Inactive | CHEMBL192682          | 1.987                       | Active   | CHEMBL2413746         | 4.029                       | Inactive |
| CHEMBL1082081         | 2.978                       | Inactive | CHEMBL278963          | 1.479                       | Active   | CHEMBL3823464         | 3.666                       | Inactive |
| CHEMBL1076260         | 2.643                       | Inactive | CHEMBL1025            | 2.079                       | Inactive | CHEMBL3822670         | 3.694                       | Inactive |
| CHEMBL188753          | 2.447                       | Inactive | CHEMBL3403874         | 0.839                       | Active   | CHEMBL3770577         | 3.799                       | Inactive |
| CHEMBL432376          | 2.079                       | Inactive | CHEMBL187591          | 4.477                       | Inactive | CHEMBL2425409         | 4.894                       | Inactive |
| CHEMBL93123           | 0.973                       | Active   | CHEMBL189774          | 1.477                       | Active   | CHEMBL222037          | 3.030                       | Inactive |
| CHEMBL188338          | 3.000                       | Inactive | CHEMBL363455          | 2.380                       | Inactive | CHEMBL3093180         | 2.022                       | Inactive |
| CHEMBL189517          | 2.041                       | Inactive | CHEMBL364585          | 1.898                       | Active   | CHEMBL3093173         | 1.991                       | Active   |
| CHEMBL292314          | 0.255                       | Active   | CHEMBL15056           | 0.415                       | Active   | CHEMBL1766143         | 4.407                       | Inactive |
| CHEMBL1082435         | 0.630                       | Active   | CHEMBL109018          | 3.530                       | Inactive | CHEMBL3115030         | 3.675                       | Inactive |
| CHEMBL1651129         | 0.560                       | Active   | CHEMBL3289936         | 2.944                       | Inactive | CHEMBL3115047         | 3.924                       | Inactive |
| CHEMBL1651247         | -0.100                      | Active   | CHEMBL1082082         | 2.398                       | Inactive | CHEMBL1819175         | 1.143                       | Active   |
| CHEMBL1651250         | 1.630                       | Active   | CHEMBL3115198         | 3.975                       | Inactive | CHEMBL189797          | 3.207                       | Inactive |
| CHEMBL1783527         | 1.881                       | Active   | CHEMBL3335062         | 3.929                       | Inactive | CHEMBL219911          | 2.562                       | Inactive |
| CHEMBL1651135         | 2.180                       | Inactive | CHEMBL3335028         | 4.571                       | Inactive | CHEMBL3322160         | 1.188                       | Active   |
| CHEMBL1651127         | 1.400                       | Active   | CHEMBL74257           | 3.176                       | Inactive | CHEMBL3122167         | 1.813                       | Active   |
| CHEMBL1651131         | 0.400                       | Active   | CHEMBL1834066         | 4.243                       | Inactive | CHEMBL341658          | 0.320                       | Active   |
| CHEMBL94059           | 3.410                       | Inactive | CHEMBL380830          | 2.785                       | Inactive | CHEMBL3415559         | 3.323                       | Inactive |
| CHEMBL1243297         | 4.614                       | Inactive | CHEMBL206237          | 3.826                       | Inactive | CHEMBL3415564         | 2.974                       | Inactive |
| CHEMBL1243012         | 1.602                       | Active   | CHEMBL1084212         | 4.107                       | Inactive | CHEMBL3415568         | 2.428                       | Inactive |
| CHEMBL573102          | 2.502                       | Inactive | CHEMBL1082980         | 4.310                       | Inactive | CHEMBL3415574         | 3.203                       | Inactive |
| CHEMBL574487          | 3.061                       | Inactive | CHEMBL1766149         | 4.190                       | Inactive | CHEMBL3415576         | 2.762                       | Inactive |
| CHEMBL188011          | 3.000                       | Inactive | CHEMBL1766146         | 4.093                       | Inactive | CHEMBL3415581         | 2.836                       | Inactive |
| CHEMBL3582205         | 1.041                       | Active   | CHEMBL1085780         | 3.940                       | Inactive | CHEMBL425739          | 1.584                       | Active   |
| CHEMBL3582209         | 2.949                       | Inactive | CHEMBL575619          | 2.593                       | Inactive | CHEMBL195067          | 1.515                       | Active   |
| CHEMBL369554          | 2.556                       | Inactive | CHEMBL3582200         | 3.679                       | Inactive | CHEMBL3233990         | 4.623                       | Inactive |
| CHEMBL1243388         | 3.520                       | Inactive | CHEMBL3582216         | 2.413                       | Inactive | CHEMBL433379          | 0.892                       | Active   |
| CHEMBL395815          | 3.364                       | Inactive | CHEMBL594187          | 1.398                       | Active   | CHEMBL143812          | -0.490                      | Active   |
| CHEMBL243272          | 1.134                       | Active   | CHEMBL1076243         | 2.000                       | Inactive | CHEMBL173309          | 1.207                       | Active   |
| CHEMBL241828          | 4.258                       | Inactive | CHEMBL1080631         | 2.724                       | Inactive | CHEMBL3085881         | 2.146                       | Inactive |
| CHEMBL242906          | 4.391                       | Inactive | CHEMBL62084           | 2.740                       | Inactive | CHEMBL499722          | 3.932                       | Inactive |
| CHEMBL265416          | 2.994                       | Inactive | CHEMBL65356           | 2.968                       | Inactive | CHEMBL131825          | 2.455                       | Inactive |
| CHEMBL413793          | 2.950                       | Inactive | CHEMBL325502          | 2.381                       | Inactive | CHEMBL241960          | 2.283                       | Inactive |
| CHEMBL3237628         | 4.854                       | Inactive | CHEMBL2064466         | 1.847                       | Active   | CHEMBL243273          | 0.892                       | Active   |
| CHEMBL3237633         | 4.233                       | Inactive | CHEMBL374981          | 0.706                       | Active   | CHEMBL3417002         | 1.653                       | Active   |
| CHEMBL1766151         | 4.412                       | Inactive | CHEMBL352500          | 0.653                       | Active   | CHEMBL492098          | 3.937                       | Inactive |
| CHEMBL1084213         | 4.243                       | Inactive | CHEMBL2088687         | 3.944                       | Inactive | CHEMBL574847          | 2.279                       | Inactive |
| CHEMBL1082977         | 4.265                       | Inactive | CHEMBL94186           | 0.857                       | Active   | CHEMBL205895          | 1.114                       | Active   |
| CHEMBL1085781         | 4.146                       | Inactive | CHEMBL219262          | 2.587                       | Inactive | CHEMBL207777          | 1.987                       | Active   |
| CHEMBL209392          | 1.867                       | Active   | CHEMBL1243329         | 0.909                       | Active   | CHEMBL3122169         | 4.199                       | Inactive |
| CHEMBL3769862         | 3.799                       | Inactive | CHEMBL474268          | 0.410                       | Active   | CHEMBL3122170         | 3.618                       | Inactive |
| CHEMBL3770516         | 3.875                       | Inactive | CHEMBL1080813         | 2.699                       | Inactive | CHEMBL572453          | 2.204                       | Inactive |

Table S1. (Cont.)

| Molecule<br>ChEMBL ID | logIC <sub>50</sub><br>(nM) | Label    | Molecule<br>ChEMBL ID | logIC <sub>50</sub><br>(nM) | Label    | Molecule<br>ChEMBL ID | logIC <sub>50</sub><br>(nM) | Label    |
|-----------------------|-----------------------------|----------|-----------------------|-----------------------------|----------|-----------------------|-----------------------------|----------|
| CHEMBL2088786         | 1.845                       | Active   | CHEMBL3289930         | 4.884                       | Inactive | CHEMBL1241457         | 2.588                       | Inactive |
| CHEMBL244416          | 1.262                       | Active   | CHEMBL3290189         | 3.979                       | Inactive | CHEMBL1243076         | 2.206                       | Inactive |
| CHEMBL3415566         | 2.736                       | Inactive | CHEMBL3356540         | 3.137                       | Inactive | CHEMBL243062          | 0.425                       | Active   |
| CHEMBL1773482         | 1.398                       | Active   | CHEMBL2047227         | 3.886                       | Inactive | CHEMBL3769811         | 3.806                       | Inactive |
| CHEMBL1773486         | 2.158                       | Inactive | CHEMBL3597001         | 3.814                       | Inactive | CHEMBL32329           | 2.255                       | Inactive |
| CHEMBL514966          | 3.260                       | Inactive | CHEMBL3884618         | 0.987                       | Active   | CHEMBL3759090         | 3.982                       | Inactive |
| CHEMBL431519          | 1.602                       | Active   | CHEMBL188823          | 0.763                       | Active   | CHEMBL3763417         | 3.775                       | Inactive |
| CHEMBL356385          | 3.486                       | Inactive | CHEMBL93936           | -0.097                      | Active   | CHEMBL3764714         | 3.887                       | Inactive |
| CHEMBL243057          | 2.773                       | Inactive | CHEMBL3754341         | 3.316                       | Inactive | CHEMBL3763232         | 3.029                       | Inactive |
| CHEMBL242191          | 1.891                       | Active   | CHEMBL2323354         | 4.798                       | Inactive | CHEMBL3763609         | 3.517                       | Inactive |
| CHEMBL242190          | 4.064                       | Inactive | CHEMBL189906          | 1.477                       | Active   | CHEMBL3763820         | 3.188                       | Inactive |
| CHEMBL394348          | 1.238                       | Active   | CHEMBL2375481         | 3.250                       | Inactive | CHEMBL3764679         | 3.587                       | Inactive |
| CHEMBL243269          | 0.978                       | Active   | CHEMBL191729          | 3.427                       | Inactive | CHEMBL393621          | 2.476                       | Inactive |
| CHEMBL235014          | 1.294                       | Active   | CHEMBL2171309         | 1.066                       | Active   | CHEMBL189907          | 1.238                       | Active   |
| CHEMBL364125          | 1.724                       | Active   | CHEMBL3892148         | 2.270                       | Inactive | CHEMBL190322          | 0.909                       | Active   |
| CHEMBL244619          | 2.170                       | Inactive | CHEMBL3910025         | 2.307                       | Inactive | CHEMBL225451          | 4.602                       | Inactive |
| CHEMBL413794          | 2.481                       | Inactive | CHEMBL4084714         | 3.952                       | Inactive | CHEMBL224469          | 4.013                       | Inactive |
| CHEMBL245054          | 3.305                       | Inactive | CHEMBL4094761         | 3.423                       | Inactive | CHEMBL244624          | 2.449                       | Inactive |
| CHEMBL427865          | 2.086                       | Inactive | CHEMBL4075021         | 4.658                       | Inactive | CHEMBL243310          | 2.305                       | Inactive |
| CHEMBL477772          | 2.968                       | Inactive | CHEMBL4101703         | 4.546                       | Inactive | CHEMBL362049          | 1.114                       | Active   |
| CHEMBL3623549         | 0.946                       | Active   | CHEMBL4062593         | 3.703                       | Inactive | CHEMBL362704          | 2.919                       | Inactive |
| CHEMBL3623566         | 3.398                       | Inactive | CHEMBL3234589         | 2.212                       | Inactive | CHEMBL2409142         | 2.689                       | Inactive |
| CHEMBL3623553         | 2.831                       | Inactive | CHEMBL3289933         | 4.886                       | Inactive | CHEMBL3585775         | -1.571                      | Active   |
| CHEMBL3623554         | 0.939                       | Active   | CHEMBL3115048         | 3.892                       | Inactive | CHEMBL3632994         | 1.903                       | Active   |
| CHEMBL3764488         | 3.827                       | Inactive | CHEMBL3115046         | 3.874                       | Inactive | CHEMBL3753360         | 2.068                       | Inactive |
| CHEMBL51085           | 3.792                       | Inactive | CHEMBL3754739         | 2.997                       | Inactive | CHEMBL507903          | 0.886                       | Active   |
| CHEMBL3769576         | 3.663                       | Inactive | CHEMBL3234588         | 3.146                       | Inactive | CHEMBL597821          | 2.949                       | Inactive |
| CHEMBL3759013         | 4.173                       | Inactive | CHEMBL3910830         | 2.991                       | Inactive | CHEMBL2323356         | 4.725                       | Inactive |
| CHEMBL3818089         | 2.591                       | Inactive | CHEMBL3921785         | 3.004                       | Inactive | CHEMBL3585375         | 2.839                       | Inactive |
| CHEMBL332051          | 1.916                       | Active   | CHEMBL4100760         | 1.569                       | Active   | CHEMBL3632846         | 3.639                       | Inactive |
| CHEMBL415675          | 2.457                       | Inactive | CHEMBL3769834         | 3.748                       | Inactive | CHEMBL3632989         | 1.903                       | Active   |
| CHEMBL241011          | 2.365                       | Inactive | CHEMBL1801815         | 3.996                       | Inactive | CHEMBL3356530         | 1.155                       | Active   |
| CHEMBL240792          | 2.132                       | Inactive | CHEMBL1080274         | 2.477                       | Inactive | CHEMBL3356953         | 1.983                       | Active   |
| CHEMBL3976003         | 3.502                       | Inactive | CHEMBL1243298         | 2.170                       | Inactive | CHEMBL3393673         | 4.778                       | Inactive |
| CHEMBL3928840         | 3.201                       | Inactive | CHEMBL4082739         | 4.131                       | Inactive | CHEMBL1288826         | 4.155                       | Inactive |
| CHEMBL3984034         | 3.508                       | Inactive | CHEMBL4087300         | 4.174                       | Inactive | CHEMBL445846          | 1.610                       | Active   |
| CHEMBL2237999         | 3.906                       | Inactive | CHEMBL3752227         | 3.752                       | Inactive | CHEMBL248922          | 3.442                       | Inactive |
| CHEMBL488590          | 1.728                       | Active   | CHEMBL3754694         | 3.875                       | Inactive | CHEMBL1651248         | 0.660                       | Active   |
| CHEMBL606034          | 4.544                       | Inactive | CHEMBL3754448         | 3.839                       | Inactive | CHEMBL328468          | -0.020                      | Active   |
| CHEMBL450553          | -0.432                      | Active   | CHEMBL25149           | 4.903                       | Inactive | CHEMBL3586582         | 2.531                       | Inactive |
| CHEMBL74926           | 1.344                       | Active   | CHEMBL4088091         | 3.322                       | Inactive | CHEMBL2237991         | 3.851                       | Inactive |
| CHEMBL427249          | 3.796                       | Inactive | CHEMBL4093532         | 4.088                       | Inactive | CHEMBL440983          | 0.823                       | Active   |
| CHEMBL224433          | 3.450                       | Inactive | CHEMBL1161674         | 2.560                       | Inactive | CHEMBL2238004         | 3.512                       | Inactive |
| CHEMBL2413743         | 2.114                       | Inactive | CHEMBL1076259         | 2.431                       | Inactive | CHEMBL1834877         | 3.653                       | Inactive |
| CHEMBL604478          | 1.204                       | Active   | CHEMBL1161718         | 2.700                       | Inactive | CHEMBL1834072         | 4.628                       | Inactive |
| CHEMBL605303          | 1.398                       | Active   | CHEMBL132365          | 2.790                       | Inactive | CHEMBL59977           | 3.480                       | Inactive |
| CHEMBL252378          | 3.130                       | Inactive | CHEMBL397891          | 2.584                       | Inactive | CHEMBL61533           | 1.940                       | Active   |
| CHEMBL2234541         | 4.150                       | Inactive | CHEMBL398406          | 1.916                       | Active   | CHEMBL599057          | 2.279                       | Inactive |
| CHEMBL400675          | 2.970                       | Inactive | CHEMBL4126674         | 4.268                       | Inactive | CHEMBL599253          | 3.185                       | Inactive |
| CHEMBL3289928         | 4.440                       | Inactive | CHEMBL1243360         | 0.845                       | Active   | CHEMBL3597556         | 3.894                       | Inactive |

Table S1. (Cont.)

| Molecule<br>ChEMBL ID | logIC <sub>50</sub><br>(nM) | Label    | Molecule<br>ChEMBL ID | logIC <sub>50</sub><br>(nM) | Label    | Molecule<br>ChEMBL ID | logIC <sub>50</sub><br>(nM) | Label    |
|-----------------------|-----------------------------|----------|-----------------------|-----------------------------|----------|-----------------------|-----------------------------|----------|
| CHEMBL3787116         | 3.207                       | Inactive | CHEMBL3410954         | 2.556                       | Inactive | CHEMBL382351          | 3.995                       | Inactive |
| CHEMBL3417008         | 3.435                       | Inactive | CHEMBL3753957         | 2.415                       | Inactive | CHEMBL3356537         | 0.966                       | Active   |
| CHEMBL191461          | 0.255                       | Active   | CHEMBL3355581         | 1.324                       | Active   | CHEMBL71994           | 4.477                       | Inactive |
| CHEMBL3905695         | 2.690                       | Inactive | CHEMBL2011404         | 4.966                       | Inactive | CHEMBL416             | 2.881                       | Inactive |
| CHEMBL2011403         | 4.193                       | Inactive | CHEMBL208132          | 3.841                       | Inactive | CHEMBL388560          | 3.279                       | Inactive |
| CHEMBL64011           | 1.778                       | Active   | CHEMBL377283          | 2.687                       | Inactive | CHEMBL2332543         | 4.439                       | Inactive |
| CHEMBL3786516         | 1.214                       | Active   | CHEMBL4083601         | 3.857                       | Inactive | CHEMBL2332974         | 4.076                       | Inactive |
| CHEMBL1773488         | 2.410                       | Inactive | CHEMBL4091385         | 3.934                       | Inactive | CHEMBL3263725         | 3.623                       | Inactive |
| CHEMBL3764100         | 2.973                       | Inactive | CHEMBL3335060         | 2.954                       | Inactive | CHEMBL3263724         | 3.279                       | Inactive |
| CHEMBL2425412         | 4.899                       | Inactive | CHEMBL3335057         | 4.265                       | Inactive | CHEMBL3263727         | 3.613                       | Inactive |
| CHEMBL598824          | 2.708                       | Inactive | CHEMBL3335056         | 3.826                       | Inactive | CHEMBL3263730         | 3.415                       | Inactive |
| CHEMBL597001          | 3.207                       | Inactive | CHEMBL3335031         | 3.322                       | Inactive | CHEMBL3263737         | 3.833                       | Inactive |
| CHEMBL604715          | 3.462                       | Inactive | CHEMBL3786442         | 1.445                       | Active   | CHEMBL1289274         | 3.568                       | Inactive |
| CHEMBL610779          | 2.799                       | Inactive | CHEMBL2206896         | 2.568                       | Inactive | CHEMBL1289615         | 4.121                       | Inactive |
| CHEMBL610219          | 4.458                       | Inactive | CHEMBL3809337         | 3.996                       | Inactive | CHEMBL4090559         | 4.845                       | Inactive |
| CHEMBL2088785         | 0.973                       | Active   | CHEMBL191314          | 4.898                       | Inactive | CHEMBL1917826         | 3.663                       | Inactive |
| CHEMBL1288822         | 3.716                       | Inactive | CHEMBL195179          | 0.843                       | Active   | CHEMBL4066805         | 4.046                       | Inactive |
| CHEMBL1288828         | 3.568                       | Inactive | CHEMBL191758          | 1.332                       | Active   | CHEMBL1651130         | 0.990                       | Active   |
| CHEMBL1243268         | 3.633                       | Inactive | CHEMBL185976          | 2.079                       | Inactive | CHEMBL3952144         | 2.430                       | Inactive |
| CHEMBL1243234         | 3.551                       | Inactive | CHEMBL366114          | 2.954                       | Inactive | CHEMBL4099340         | 3.427                       | Inactive |
| CHEMBL1243111         | 2.390                       | Inactive | CHEMBL362752          | 0.778                       | Active   | CHEMBL218940          | 1.763                       | Active   |
| CHEMBL2234529         | 2.780                       | Inactive | CHEMBL328715          | 2.908                       | Inactive | CHEMBL436302          | 2.369                       | Inactive |
| CHEMBL2234528         | 2.040                       | Inactive | CHEMBL65667           | 3.580                       | Inactive | CHEMBL597822          | 2.255                       | Inactive |
| CHEMBL2234520         | 4.970                       | Inactive | CHEMBL4285749         | 3.969                       | Inactive | CHEMBL598645          | 2.949                       | Inactive |
| CHEMBL2234512         | 3.590                       | Inactive | CHEMBL4294446         | 3.393                       | Inactive | CHEMBL3401159         | 1.544                       | Active   |
| CHEMBL2234837         | 3.890                       | Inactive | CHEMBL4284235         | 2.987                       | Inactive | CHEMBL603622          | 1.602                       | Active   |
| CHEMBL253603          | 3.950                       | Inactive | CHEMBL257540          | 2.979                       | Inactive | CHEMBL272700          | 2.741                       | Inactive |
| CHEMBL398250          | 4.140                       | Inactive | CHEMBL235548          | 3.583                       | Inactive | CHEMBL205340          | 1.973                       | Active   |
| CHEMBL252578          | 3.730                       | Inactive | CHEMBL396190          | 2.924                       | Inactive | CHEMBL61486           | 3.580                       | Inactive |
| CHEMBL252580          | 3.810                       | Inactive | CHEMBL241536          | 2.545                       | Inactive | CHEMBL1289159         | 3.623                       | Inactive |
| CHEMBL253782          | 3.910                       | Inactive | CHEMBL1082978         | 3.991                       | Inactive | CHEMBL1289942         | 3.709                       | Inactive |
| CHEMBL253386          | 2.910                       | Inactive | CHEMBL1766142         | 4.305                       | Inactive | CHEMBL61930           | 2.670                       | Inactive |
| CHEMBL3235503         | 0.702                       | Active   | CHEMBL1766140         | 4.422                       | Inactive | CHEMBL597405          | 3.693                       | Inactive |
| CHEMBL2234531         | 2.200                       | Inactive | CHEMBL1766148         | 4.384                       | Inactive | CHEMBL599058          | 2.580                       | Inactive |
| CHEMBL2234544         | 3.820                       | Inactive | CHEMBL1766141         | 4.427                       | Inactive | CHEMBL572480          | 2.000                       | Inactive |
| CHEMBL2234540         | 4.280                       | Inactive | CHEMBL62664           | 1.602                       | Active   | CHEMBL507885          | 0.684                       | Active   |
| CHEMBL1834064         | 4.140                       | Inactive | CHEMBL367795          | 1.914                       | Active   | CHEMBL179320          | 3.423                       | Inactive |
| CHEMBL1912058         | -0.327                      | Active   | CHEMBL178770          | 1.362                       | Active   | CHEMBL11805           | 2.230                       | Inactive |
| CHEMBL2234530         | 1.960                       | Active   | CHEMBL1783522         | 2.474                       | Inactive | CHEMBL219406          | 2.228                       | Inactive |
| CHEMBL2234514         | 3.270                       | Inactive | CHEMBL4095032         | 3.763                       | Inactive | CHEMBL219400          | 2.529                       | Inactive |
| CHEMBL2234830         | 4.390                       | Inactive | CHEMBL4073501         | 3.556                       | Inactive | CHEMBL392324          | 1.845                       | Active   |
| CHEMBL2234537         | 2.780                       | Inactive | CHEMBL595114          | 1.380                       | Active   | CHEMBL243311          | 3.360                       | Inactive |
| CHEMBL2234523         | 4.330                       | Inactive | CHEMBL623             | 3.016                       | Inactive | CHEMBL1243140         | 2.919                       | Inactive |
| CHEMBL3133427         | 2.968                       | Inactive | CHEMBL4214932         | 2.364                       | Inactive | CHEMBL340391          | 1.000                       | Active   |
| CHEMBL2064471         | 0.652                       | Active   | CHEMBL3586200         | 3.228                       | Inactive | CHEMBL11833           | 1.477                       | Active   |
| CHEMBL2064470         | 1.928                       | Active   | CHEMBL3356954         | 1.580                       | Active   | CHEMBL335167          | 2.839                       | Inactive |
| CHEMBL556581          | 0.605                       | Active   | CHEMBL1834811         | 3.785                       | Inactive | CHEMBL61715           | 1.450                       | Active   |
| CHEMBL3632852         | 3.398                       | Inactive | CHEMBL3752555         | 2.736                       | Inactive | CHEMBL302842          | 2.540                       | Inactive |
| CHEMBL3410953         | 2.792                       | Inactive | CHEMBL205335          | 2.152                       | Inactive | CHEMBL597188          | 1.748                       | Active   |
| CHEMBL3632851         | 3.542                       | Inactive | CHEMBL381926          | 1.914                       | Active   | CHEMBL86031           | 2.000                       | Inactive |

Table S1. (Cont.)

| Molecule<br>ChEMBL ID | logIC <sub>50</sub><br>(nM) | Label    | Molecule<br>ChEMBL ID | logIC <sub>50</sub><br>(nM) | Label    | Molecule<br>ChEMBL ID | logIC <sub>50</sub><br>(nM) | Label    |
|-----------------------|-----------------------------|----------|-----------------------|-----------------------------|----------|-----------------------|-----------------------------|----------|
| CHEMBL243271          | 0.352                       | Active   | CHEMBL415799          | 2.352                       | Inactive | CHEMBL3343885         | 1.967                       | Active   |
| CHEMBL244837          | 4.481                       | Inactive | CHEMBL222044          | 3.420                       | Inactive | CHEMBL3343930         | 2.064                       | Inactive |
| CHEMBL396050          | 2.090                       | Inactive | CHEMBL3632848         | 4.124                       | Inactive | CHEMBL1783535         | 2.791                       | Inactive |
| CHEMBL205940          | 1.748                       | Active   | CHEMBL3764900         | 3.819                       | Inactive | CHEMBL1783524         | 2.201                       | Inactive |
| CHEMBL381782          | 3.741                       | Inactive | CHEMBL230702          | 0.373                       | Active   | CHEMBL1783528         | 0.778                       | Active   |
| CHEMBL195241          | 0.613                       | Active   | CHEMBL158946          | 1.778                       | Active   | CHEMBL2234534         | 2.730                       | Inactive |
| CHEMBL364545          | 3.441                       | Inactive | CHEMBL179455          | 0.190                       | Active   | CHEMBL191416          | 3.476                       | Inactive |
| CHEMBL218443          | 1.865                       | Active   | CHEMBL270248          | 3.626                       | Inactive | CHEMBL313231          | 1.618                       | Active   |
| CHEMBL209924          | 3.006                       | Inactive | CHEMBL1773492         | 2.114                       | Inactive | CHEMBL418955          | 0.919                       | Active   |
| CHEMBL1288821         | 3.785                       | Inactive | CHEMBL60119           | 2.000                       | Inactive | CHEMBL1651125         | 1.520                       | Active   |
| CHEMBL1289825         | 3.836                       | Inactive | CHEMBL328102          | 1.996                       | Active   | CHEMBL1651128         | 1.600                       | Active   |
| CHEMBL1288829         | 3.623                       | Inactive | CHEMBL237870          | 2.713                       | Inactive | CHEMBL1651133         | 0.710                       | Active   |
| CHEMBL92463           | 1.410                       | Active   | CHEMBL243532          | 2.212                       | Inactive | CHEMBL1651243         | 0.460                       | Active   |
| CHEMBL225198          | 3.954                       | Inactive | CHEMBL2332544         | 4.293                       | Inactive | CHEMBL1651245         | 1.720                       | Active   |
| CHEMBL384886          | 1.858                       | Active   | CHEMBL2332975         | 4.536                       | Inactive | CHEMBL1084790         | 1.080                       | Active   |
| CHEMBL220141          | 2.130                       | Inactive | CHEMBL152675          | 4.343                       | Inactive | CHEMBL75013           | 2.290                       | Inactive |
| CHEMBL385269          | 1.713                       | Active   | CHEMBL2332537         | 3.989                       | Inactive | CHEMBL513236          | 3.569                       | Inactive |
| CHEMBL178294          | 1.748                       | Active   | CHEMBL2332535         | 4.213                       | Inactive | CHEMBL604255          | 3.778                       | Inactive |
| CHEMBL225567          | 3.301                       | Inactive | CHEMBL454594          | 4.257                       | Inactive | CHEMBL3235502         | 4.362                       | Inactive |
| CHEMBL134240          | 4.000                       | Inactive | CHEMBL2314726         | 1.633                       | Active   | CHEMBL205321          | 3.535                       | Inactive |
| CHEMBL130373          | 4.620                       | Inactive | CHEMBL490360          | 3.630                       | Inactive | CHEMBL190528          | 2.716                       | Inactive |
| CHEMBL134057          | 0.970                       | Active   | CHEMBL134342          | 0.000                       | Active   | CHEMBL1770554         | 4.497                       | Inactive |
| CHEMBL1770548         | 2.297                       | Inactive | CHEMBL199670          | -0.301                      | Active   | CHEMBL2332538         | 4.240                       | Inactive |
| CHEMBL92775           | 2.004                       | Inactive | CHEMBL92955           | 1.146                       | Active   | CHEMBL3115025         | 2.653                       | Inactive |
| CHEMBL87823           | 1.699                       | Active   | CHEMBL2332541         | 3.899                       | Inactive | CHEMBL1940613         | 1.446                       | Active   |
| CHEMBL187603          | 2.279                       | Inactive | CHEMBL2332531         | 3.843                       | Inactive | CHEMBL1940615         | 1.815                       | Active   |
| CHEMBL130270          | 1.176                       | Active   | CHEMBL3115037         | 3.371                       | Inactive | CHEMBL1940618         | 4.236                       | Inactive |
| CHEMBL606538          | 1.491                       | Active   | CHEMBL491528          | 4.732                       | Inactive | CHEMBL1766144         | 4.334                       | Inactive |
| CHEMBL606348          | 1.462                       | Active   | CHEMBL3310699         | 4.877                       | Inactive | CHEMBL3335067         | 4.255                       | Inactive |
| CHEMBL596236          | 1.342                       | Active   | CHEMBL242345          | 3.110                       | Inactive | CHEMBL3335065         | 4.267                       | Inactive |
| CHEMBL240793          | 2.363                       | Inactive | CHEMBL394865          | 1.140                       | Active   | CHEMBL3335054         | 3.806                       | Inactive |
| CHEMBL507304          | 1.146                       | Active   | CHEMBL511948          | 4.241                       | Inactive | CHEMBL3335051         | 3.230                       | Inactive |
| CHEMBL1161716         | 3.230                       | Inactive | CHEMBL242836          | 1.111                       | Active   | CHEMBL24416           | 4.845                       | Inactive |
| CHEMBL575621          | 2.661                       | Inactive | CHEMBL3318018         | 1.740                       | Active   | CHEMBL227075          | 3.000                       | Inactive |
| CHEMBL512096          | 2.851                       | Inactive | CHEMBL3339007         | 4.886                       | Inactive | CHEMBL3122166         | 4.358                       | Inactive |
| CHEMBL303574          | 3.881                       | Inactive | CHEMBL597406          | 4.068                       | Inactive | CHEMBL3122150         | 2.974                       | Inactive |
| CHEMBL278342          | 1.415                       | Active   | CHEMBL75121           | 1.648                       | Active   | CHEMBL3632993         | 1.903                       | Active   |
| CHEMBL2238000         | 2.544                       | Inactive | CHEMBL26125           | 2.258                       | Inactive | CHEMBL3415570         | 2.640                       | Inactive |
| CHEMBL2236393         | -0.495                      | Active   | CHEMBL3343932         | 2.185                       | Inactive | CHEMBL511575          | 4.610                       | Inactive |
| CHEMBL2234521         | 4.710                       | Inactive | CHEMBL2380676         | 3.526                       | Inactive | CHEMBL455790          | 4.021                       | Inactive |
| CHEMBL2234829         | 3.850                       | Inactive | CHEMBL1243170         | 3.398                       | Inactive | CHEMBL594186          | 1.708                       | Active   |
| CHEMBL252380          | 2.850                       | Inactive | CHEMBL2160226         | 2.531                       | Inactive | CHEMBL606372          | 1.602                       | Active   |
| CHEMBL404407          | 3.710                       | Inactive | CHEMBL2160223         | 4.569                       | Inactive | CHEMBL3322155         | 2.763                       | Inactive |
| CHEMBL1834061         | 4.223                       | Inactive | CHEMBL2160224         | 4.892                       | Inactive | CHEMBL3323036         | 2.155                       | Inactive |
| CHEMBL1834063         | 3.903                       | Inactive | CHEMBL2234522         | 3.850                       | Inactive | CHEMBL3323056         | 3.079                       | Inactive |
| CHEMBL1834074         | 4.000                       | Inactive | CHEMBL2234513         | 3.590                       | Inactive | CHEMBL1651126         | 1.360                       | Active   |
| CHEMBL1834079         | 4.593                       | Inactive | CHEMBL2234844         | 3.290                       | Inactive | CHEMBL1084275         | 0.830                       | Active   |
| CHEMBL1766018         | 4.360                       | Inactive | CHEMBL2234842         | 3.190                       | Inactive | CHEMBL3237630         | 3.959                       | Inactive |
| CHEMBL1766016         | 4.220                       | Inactive | CHEMBL2234840         | 4.320                       | Inactive | CHEMBL3263731         | 3.708                       | Inactive |
| CHEMBL3632992         | 2.000                       | Inactive | CHEMBL225611          | 3.796                       | Inactive | CHEMBL241827          | 3.491                       | Inactive |

Table S1. (Cont.)

| Molecule<br>ChEMBL ID | logIC <sub>50</sub><br>(nM) | Label    | Molecule<br>ChEMBL ID | logIC <sub>50</sub><br>(nM) | Label    | Molecule<br>ChEMBL ID | logIC <sub>50</sub><br>(nM) | Label    |
|-----------------------|-----------------------------|----------|-----------------------|-----------------------------|----------|-----------------------|-----------------------------|----------|
| CHEMBL1084808         | 4.396                       | Inactive | CHEMBL189283          | 2.580                       | Inactive | CHEMBL574474          | 2.283                       | Inactive |
| CHEMBL594870          | 1.491                       | Active   | CHEMBL360832          | 1.954                       | Active   | CHEMBL225366          | 3.894                       | Inactive |
| CHEMBL205967          | 3.384                       | Inactive | CHEMBL219063          | 2.382                       | Inactive | CHEMBL283509          | 0.000                       | Active   |
| CHEMBL592433          | 4.477                       | Inactive | CHEMBL3754778         | 3.015                       | Inactive | CHEMBL2238003         | 3.972                       | Inactive |
| CHEMBL2234527         | 2.480                       | Inactive | CHEMBL441868          | 3.279                       | Inactive | CHEMBL3115044         | 3.728                       | Inactive |
| CHEMBL2234835         | 4.380                       | Inactive | CHEMBL1289160         | 3.494                       | Inactive | CHEMBL212162          | 3.128                       | Inactive |
| CHEMBL2234834         | 4.160                       | Inactive | CHEMBL1289273         | 3.633                       | Inactive | CHEMBL187812          | 4.292                       | Inactive |
| CHEMBL252579          | 3.110                       | Inactive | CHEMBL1289506         | 3.820                       | Inactive | CHEMBL1161717         | 2.200                       | Inactive |
| CHEMBL424833          | 1.547                       | Active   | CHEMBL1161719         | 3.570                       | Inactive | CHEMBL2206900         | 3.705                       | Inactive |
| CHEMBL3263734         | 3.672                       | Inactive | CHEMBL382207          | 3.587                       | Inactive | CHEMBL126939          | 2.320                       | Inactive |
| CHEMBL1618106         | 2.431                       | Inactive | CHEMBL205231          | 1.431                       | Active   | CHEMBL91291           | 0.760                       | Active   |
| CHEMBL2206898         | 3.759                       | Inactive | CHEMBL378404          | 1.580                       | Active   | CHEMBL478667          | 0.217                       | Active   |
| CHEMBL2206895         | 2.519                       | Inactive | CHEMBL4065799         | 4.530                       | Inactive | CHEMBL2047529         | 2.076                       | Inactive |
| CHEMBL2206894         | 3.656                       | Inactive | CHEMBL491360          | 2.348                       | Inactive | CHEMBL2047224         | 3.886                       | Inactive |
| CHEMBL2206892         | 2.602                       | Inactive | CHEMBL491359          | 2.199                       | Inactive | CHEMBL3764609         | 3.228                       | Inactive |
| CHEMBL1243359         | 1.238                       | Active   | CHEMBL3417300         | 1.207                       | Active   | CHEMBL3582218         | 2.336                       | Inactive |
| CHEMBL1191355         | 4.763                       | Inactive | CHEMBL1080814         | 2.255                       | Inactive | CHEMBL4210020         | 0.612                       | Active   |
| CHEMBL2425414         | 4.997                       | Inactive | CHEMBL2297280         | 1.968                       | Active   | CHEMBL4212275         | 1.667                       | Active   |
| CHEMBL1082979         | 4.422                       | Inactive | CHEMBL1770555         | 2.484                       | Inactive | CHEMBL4212713         | 1.823                       | Active   |
| CHEMBL3116289         | 3.987                       | Inactive | CHEMBL1783516         | 1.041                       | Active   | CHEMBL4175175         | 2.672                       | Inactive |
| CHEMBL1973869         | 3.863                       | Inactive | CHEMBL3632849         | 3.820                       | Inactive | CHEMBL2332546         | 4.197                       | Inactive |
| CHEMBL1834070         | 4.508                       | Inactive | CHEMBL3115020         | 3.634                       | Inactive | CHEMBL3262251         | 3.806                       | Inactive |
| CHEMBL1834075         | 4.462                       | Inactive | CHEMBL3116279         | 3.462                       | Inactive | CHEMBL1834068         | 4.068                       | Inactive |
| CHEMBL1834078         | 4.334                       | Inactive | CHEMBL1651139         | 0.040                       | Active   | CHEMBL1834069         | 4.137                       | Inactive |
| CHEMBL3361270         | 2.204                       | Inactive | CHEMBL1651141         | 1.950                       | Active   | CHEMBL4075061         | 1.954                       | Active   |
| CHEMBL3597548         | 4.792                       | Inactive | CHEMBL1179697         | -0.320                      | Active   | CHEMBL4210316         | -1.841                      | Active   |
| CHEMBL3597055         | 4.180                       | Inactive | CHEMBL1651134         | 0.690                       | Active   | CHEMBL3582213         | 2.272                       | Inactive |
| CHEMBL3623555         | 2.904                       | Inactive | CHEMBL65585           | 1.845                       | Active   | CHEMBL4218191         | -1.582                      | Active   |
| CHEMBL3582228         | 2.693                       | Inactive | CHEMBL383242          | 3.740                       | Inactive | CHEMBL4209518         | -1.532                      | Active   |
| CHEMBL3582229         | 2.890                       | Inactive | CHEMBL207931          | 4.031                       | Inactive | CHEMBL4208641         | 0.210                       | Active   |
| CHEMBL28              | 1.079                       | Active   | CHEMBL4079853         | 4.844                       | Inactive | CHEMBL1783517         | 0.477                       | Active   |
| CHEMBL1766145         | 4.459                       | Inactive | CHEMBL1819179         | 2.412                       | Inactive | CHEMBL1082981         | 3.944                       | Inactive |
| CHEMBL2419689         | 3.990                       | Inactive | CHEMBL1289045         | 3.326                       | Inactive | CHEMBL2413734         | 4.707                       | Inactive |
| CHEMBL128780          | 2.000                       | Inactive | CHEMBL1288825         | 4.086                       | Inactive | CHEMBL2413736         | 2.591                       | Inactive |
| CHEMBL128202          | -0.252                      | Active   | CHEMBL523311          | 4.566                       | Inactive | CHEMBL1834809         | 3.491                       | Inactive |
| CHEMBL2380667         | 3.764                       | Inactive | CHEMBL471581          | 3.217                       | Inactive | CHEMBL4288850         | 2.477                       | Inactive |
| CHEMBL3115029         | 4.039                       | Inactive | CHEMBL219550          | 1.230                       | Active   | CHEMBL61929           | 3.720                       | Inactive |
| CHEMBL3115043         | 3.838                       | Inactive | CHEMBL266045          | 1.950                       | Active   | CHEMBL1819169         | 1.838                       | Active   |
| CHEMBL87014           | 1.342                       | Active   | CHEMBL132285          | 2.892                       | Inactive | CHEMBL1819172         | 1.531                       | Active   |
| CHEMBL3353040         | 1.860                       | Active   | CHEMBL1241427         | 1.754                       | Active   | CHEMBL3233993         | 4.708                       | Inactive |
| CHEMBL133441          | 3.800                       | Inactive | CHEMBL1171854         | 3.398                       | Inactive | CHEMBL3289934         | 4.656                       | Inactive |
| CHEMBL2425407         | 4.870                       | Inactive | CHEMBL362444          | 1.431                       | Active   | CHEMBL3289937         | 1.756                       | Active   |
| CHEMBL132260          | 2.420                       | Inactive | CHEMBL178132          | 3.587                       | Inactive | CHEMBL3360758         | 3.799                       | Inactive |
| CHEMBL2064464         | 1.173                       | Active   | CHEMBL361409          | 1.973                       | Active   | CHEMBL3115033         | 3.393                       | Inactive |
| CHEMBL66309           | 2.580                       | Inactive | CHEMBL313582          | 2.143                       | Inactive | CHEMBL4282558         | 3.405                       | Inactive |
| CHEMBL65018           | 1.903                       | Active   | CHEMBL19557           | 4.954                       | Inactive | CHEMBL4167973         | 3.299                       | Inactive |
| CHEMBL4063045         | 3.924                       | Inactive | CHEMBL491562          | 4.292                       | Inactive | CHEMBL4169394         | 4.025                       | Inactive |
| CHEMBL4090583         | 4.386                       | Inactive | CHEMBL3900968         | 1.982                       | Active   | CHEMBL521589          | 4.477                       | Inactive |
| CHEMBL187385          | 2.623                       | Inactive | CHEMBL3937964         | 2.348                       | Inactive | CHEMBL255230          | 4.642                       | Inactive |
| CHEMBL185799          | 2.398                       | Inactive | CHEMBL4095755         | 1.342                       | Active   | CHEMBL271709          | 3.660                       | Inactive |



Table S1. (Cont.)

| Molecule<br>ChEMBL ID | logIC <sub>50</sub><br>(nM) | Label    | Molecule<br>ChEMBL ID | logIC <sub>50</sub><br>(nM) | Label    | Molecule<br>ChEMBL ID | logIC <sub>50</sub><br>(nM) | Label    |
|-----------------------|-----------------------------|----------|-----------------------|-----------------------------|----------|-----------------------|-----------------------------|----------|
| CHEMBL4294028         | 3.885                       | Inactive | CHEMBL3353567         | 4.724                       | Inactive | CHEMBL2234515         | 3.330                       | Inactive |
| CHEMBL3337471         | 3.883                       | Inactive | CHEMBL3310705         | 4.079                       | Inactive | CHEMBL2234543         | 4.230                       | Inactive |
| CHEMBL1819173         | 1.453                       | Active   | CHEMBL535             | 3.769                       | Inactive | CHEMBL2234539         | 4.340                       | Inactive |
| CHEMBL2206893         | 3.894                       | Inactive | CHEMBL3786651         | 1.299                       | Active   | CHEMBL253783          | 3.150                       | Inactive |
| CHEMBL524100          | 3.288                       | Inactive | CHEMBL1783534         | 1.398                       | Active   | CHEMBL3623557         | 2.199                       | Inactive |
| CHEMBL1929043         | 4.190                       | Inactive | CHEMBL1783521         | 1.881                       | Active   | CHEMBL2386558         | 3.212                       | Inactive |
| CHEMBL4286601         | 0.799                       | Active   | CHEMBL3343714         | 2.980                       | Inactive | CHEMBL2088780         | 2.591                       | Inactive |
| CHEMBL4074566         | 3.724                       | Inactive | CHEMBL3335066         | 2.903                       | Inactive | CHEMBL2088783         | 3.491                       | Inactive |
| CHEMBL4127071         | 3.960                       | Inactive | CHEMBL3410951         | 2.453                       | Inactive | CHEMBL75110           | 1.720                       | Active   |
| CHEMBL4100935         | 1.950                       | Active   | CHEMBL1085527         | 1.338                       | Active   | CHEMBL1651249         | -0.310                      | Active   |
| CHEMBL3582202         | 2.130                       | Inactive | CHEMBL4091317         | 3.929                       | Inactive | CHEMBL4214900         | 2.288                       | Inactive |
| CHEMBL3582210         | 3.430                       | Inactive | CHEMBL1834806         | 3.230                       | Inactive | CHEMBL1773487         | 2.155                       | Inactive |
| CHEMBL2234833         | 4.510                       | Inactive | CHEMBL1834808         | 3.255                       | Inactive | CHEMBL3916769         | 2.799                       | Inactive |
| CHEMBL3585780         | -1.571                      | Active   | CHEMBL2234836         | 4.430                       | Inactive | CHEMBL1834077         | 4.496                       | Inactive |
| CHEMBL2088784         | 2.342                       | Inactive | CHEMBL2234547         | 3.480                       | Inactive | CHEMBL1783530         | 2.872                       | Inactive |
| CHEMBL3764376         | 2.623                       | Inactive | CHEMBL2234538         | 4.110                       | Inactive | CHEMBL1783526         | 1.301                       | Active   |
| CHEMBL2237993         | 3.818                       | Inactive | CHEMBL253602          | 4.320                       | Inactive | CHEMBL1783499         | 1.146                       | Active   |
| CHEMBL3600555         | 0.170                       | Active   | CHEMBL226335          | 1.079                       | Active   | CHEMBL2409140         | 4.320                       | Inactive |
| CHEMBL3764762         | 3.260                       | Inactive | CHEMBL4205910         | 4.000                       | Inactive | CHEMBL3585777         | -1.571                      | Active   |
| CHEMBL164             | 1.079                       | Active   | CHEMBL4292235         | 2.322                       | Inactive | CHEMBL3736339         | 3.013                       | Inactive |
| CHEMBL3597062         | 3.732                       | Inactive | CHEMBL4160790         | 2.880                       | Inactive | CHEMBL1940616         | 3.267                       | Inactive |
| CHEMBL2323352         | 4.947                       | Inactive | CHEMBL3582227         | 2.942                       | Inactive | CHEMBL3949439         | 3.543                       | Inactive |
| CHEMBL3623564         | 4.246                       | Inactive | CHEMBL3289926         | 2.964                       | Inactive | CHEMBL3754005         | 2.299                       | Inactive |
| CHEMBL446060          | 3.362                       | Inactive | CHEMBL3585781         | -1.571                      | Active   | CHEMBL3753508         | 3.227                       | Inactive |
| CHEMBL3623550         | 0.923                       | Active   | CHEMBL3582204         | 3.522                       | Inactive | CHEMBL3752969         | 1.185                       | Active   |
| CHEMBL3623556         | 2.041                       | Inactive | CHEMBL3582207         | 2.577                       | Inactive | CHEMBL2088782         | 2.079                       | Inactive |
| CHEMBL3623561         | 2.854                       | Inactive | CHEMBL3263732         | 3.748                       | Inactive | CHEMBL3818512         | 2.875                       | Inactive |
| CHEMBL598632          | 3.057                       | Inactive | CHEMBL3234592         | 1.886                       | Active   | CHEMBL611941          | 3.100                       | Inactive |
| CHEMBL3410957         | 2.656                       | Inactive | CHEMBL3752543         | 1.033                       | Active   | CHEMBL1834807         | 3.431                       | Inactive |
| CHEMBL3410956         | 2.355                       | Inactive | CHEMBL3735042         | 3.949                       | Inactive | CHEMBL4294389         | 3.871                       | Inactive |
| CHEMBL3632847         | 3.188                       | Inactive | CHEMBL599252          | 3.597                       | Inactive | CHEMBL4278883         | 3.954                       | Inactive |
| CHEMBL3632626         | 3.858                       | Inactive | CHEMBL603256          | 2.301                       | Inactive | CHEMBL3582226         | 2.819                       | Inactive |
| CHEMBL2332547         | 4.141                       | Inactive | CHEMBL1783525         | 0.845                       | Active   | CHEMBL2323355         | 4.866                       | Inactive |
| CHEMBL3752974         | 4.255                       | Inactive | CHEMBL3822790         | 3.967                       | Inactive | CHEMBL3403877         | 1.238                       | Active   |
| CHEMBL1288824         | 3.917                       | Inactive | CHEMBL1289507         | 3.934                       | Inactive | CHEMBL1082433         | 2.480                       | Inactive |
| CHEMBL572532          | 2.176                       | Inactive | CHEMBL1290043         | 3.863                       | Inactive | CHEMBL1651246         | 1.150                       | Active   |
| CHEMBL3632853         | 3.544                       | Inactive | CHEMBL1288827         | 4.187                       | Inactive | CHEMBL459258          | 4.686                       | Inactive |
| CHEMBL1411769         | 3.869                       | Inactive | CHEMBL3093787         | 1.290                       | Active   | CHEMBL4069444         | 3.863                       | Inactive |
| CHEMBL3416999         | 2.346                       | Inactive | CHEMBL3780448         | 4.907                       | Inactive | CHEMBL4090413         | 3.681                       | Inactive |
| CHEMBL2160220         | 4.831                       | Inactive | CHEMBL4207101         | 0.881                       | Active   | CHEMBL2022933         | 2.813                       | Inactive |
| CHEMBL3122149         | 2.904                       | Inactive | CHEMBL4280612         | -0.367                      | Active   | CHEMBL3353042         | 2.634                       | Inactive |
| CHEMBL3122145         | 3.025                       | Inactive | CHEMBL3623552         | 0.716                       | Active   | CHEMBL3415561         | 2.695                       | Inactive |
| CHEMBL3122171         | 4.114                       | Inactive | CHEMBL3751866         | 1.886                       | Active   | CHEMBL128390          | 1.623                       | Active   |
| CHEMBL2047531         | 2.143                       | Inactive | CHEMBL449467          | 1.201                       | Active   | CHEMBL3263729         | 3.580                       | Inactive |
| CHEMBL3116287         | 3.623                       | Inactive | CHEMBL3338997         | 4.533                       | Inactive | CHEMBL1783518         | 0.477                       | Active   |
| CHEMBL3310704         | 4.157                       | Inactive | CHEMBL3403878         | 1.512                       | Active   | CHEMBL2332534         | 4.135                       | Inactive |
| CHEMBL1819174         | 2.452                       | Inactive | CHEMBL128260          | 0.447                       | Active   | CHEMBL2332976         | 3.777                       | Inactive |
| CHEMBL3355594         | 4.083                       | Inactive | CHEMBL2234532         | 1.790                       | Active   | CHEMBL2323353         | 4.911                       | Inactive |
| CHEMBL3823197         | 3.920                       | Inactive | CHEMBL2234526         | 1.720                       | Active   | CHEMBL2323351         | 4.909                       | Inactive |
| CHEMBL3823578         | 3.870                       | Inactive | CHEMBL2234517         | 4.840                       | Inactive | CHEMBL2237994         | 2.716                       | Inactive |

Table S1. (Cont.)

| Molecule<br>ChEMBL ID | logIC <sub>50</sub><br>(nM) | Label    | Molecule<br>ChEMBL ID | logIC <sub>50</sub><br>(nM) | Label    | Molecule<br>ChEMBL ID | logIC <sub>50</sub><br>(nM) | Label    |
|-----------------------|-----------------------------|----------|-----------------------|-----------------------------|----------|-----------------------|-----------------------------|----------|
| CHEMBL3781564         | 2.477                       | Inactive | CHEMBL3786873         | 1.489                       | Active   | CHEMBL4083875         | 3.813                       | Inactive |
| CHEMBL1834060         | 4.199                       | Inactive | CHEMBL3884858         | 1.260                       | Active   | CHEMBL3322157         | 2.017                       | Inactive |
| CHEMBL1834810         | 3.771                       | Inactive | CHEMBL2396910         | 4.776                       | Inactive | CHEMBL3115038         | 3.693                       | Inactive |
| CHEMBL4085450         | 1.900                       | Active   | CHEMBL1254269         | 3.117                       | Inactive | CHEMBL2332550         | 4.200                       | Inactive |
| CHEMBL4128191         | 4.030                       | Inactive | CHEMBL3822559         | 3.580                       | Inactive | CHEMBL3597006         | 3.332                       | Inactive |
| CHEMBL129577          | 2.230                       | Inactive | CHEMBL3823317         | 3.556                       | Inactive | CHEMBL3605423         | 3.827                       | Inactive |
| CHEMBL1172893         | 3.785                       | Inactive | CHEMBL2047375         | 4.100                       | Inactive | CHEMBL3605418         | 3.979                       | Inactive |
| CHEMBL3623565         | 3.723                       | Inactive | CHEMBL1773483         | 1.380                       | Active   | CHEMBL3353039         | 2.283                       | Inactive |
| CHEMBL3318017         | 1.531                       | Active   | CHEMBL3343927         | 1.801                       | Active   | CHEMBL3338993         | 4.116                       | Inactive |
| CHEMBL4081805         | 4.146                       | Inactive | CHEMBL3335052         | 3.964                       | Inactive | CHEMBL3339003         | 4.644                       | Inactive |
| CHEMBL4070380         | 3.898                       | Inactive | CHEMBL3343884         | 2.512                       | Inactive | CHEMBL468000          | 3.204                       | Inactive |
| CHEMBL2380675         | 3.881                       | Inactive | CHEMBL3343882         | 1.992                       | Active   | CHEMBL3770479         | 3.778                       | Inactive |
| CHEMBL2071425         | 3.303                       | Inactive | CHEMBL3753850         | 1.387                       | Active   | CHEMBL3764211         | 1.826                       | Active   |
| CHEMBL3233992         | 4.788                       | Inactive | CHEMBL337675          | 1.415                       | Active   | CHEMBL1079905         | 3.806                       | Inactive |
| CHEMBL2419685         | 3.728                       | Inactive | CHEMBL131210          | 1.892                       | Active   | CHEMBL1424            | 3.954                       | Inactive |
| CHEMBL2419683         | 3.587                       | Inactive | CHEMBL3824239         | 3.188                       | Inactive | CHEMBL3785391         | 0.855                       | Active   |
| CHEMBL1196204         | 1.286                       | Active   | CHEMBL3824362         | 4.087                       | Inactive | CHEMBL3600553         | 0.810                       | Active   |
| CHEMBL3310703         | 3.398                       | Inactive | CHEMBL3965046         | 4.491                       | Inactive | CHEMBL3093175         | 2.085                       | Inactive |
| CHEMBL3632850         | 3.827                       | Inactive | CHEMBL599254          | 3.121                       | Inactive | CHEMBL3093174         | 2.195                       | Inactive |
| CHEMBL3632990         | 2.176                       | Inactive | CHEMBL1766020         | 4.152                       | Inactive | CHEMBL3765293         | 3.310                       | Inactive |
| CHEMBL2413735         | 2.602                       | Inactive | CHEMBL4100298         | 1.591                       | Active   | CHEMBL3335032         | 3.431                       | Inactive |
| CHEMBL3343920         | 2.185                       | Inactive | CHEMBL3735606         | 3.771                       | Inactive | CHEMBL3335064         | 3.613                       | Inactive |
| CHEMBL3343712         | 2.629                       | Inactive | CHEMBL3764433         | 3.850                       | Inactive | CHEMBL2413742         | 3.146                       | Inactive |
| CHEMBL3417000         | 2.507                       | Inactive | CHEMBL4061746         | 3.875                       | Inactive | CHEMBL350032          | 4.180                       | Inactive |
| CHEMBL3417003         | 2.083                       | Inactive | CHEMBL4079345         | 3.875                       | Inactive | CHEMBL2425417         | 4.959                       | Inactive |
| CHEMBL3087679         | 4.444                       | Inactive | CHEMBL4067481         | 3.820                       | Inactive | CHEMBL3416997         | 1.756                       | Active   |
| CHEMBL2332979         | 3.526                       | Inactive | CHEMBL4100046         | 3.869                       | Inactive | CHEMBL3415560         | 2.481                       | Inactive |
| CHEMBL2332533         | 4.391                       | Inactive | CHEMBL4102655         | 3.845                       | Inactive | CHEMBL2237992         | 3.847                       | Inactive |
| CHEMBL2332549         | 4.096                       | Inactive | CHEMBL490338          | 1.851                       | Active   | CHEMBL2237997         | 4.015                       | Inactive |
| CHEMBL3234591         | 2.415                       | Inactive | CHEMBL474837          | 3.196                       | Inactive | CHEMBL4075571         | 2.845                       | Inactive |
| CHEMBL3356538         | 2.814                       | Inactive | CHEMBL4130217         | 3.600                       | Inactive | CHEMBL4097374         | 3.857                       | Inactive |
| CHEMBL3323053         | 3.041                       | Inactive | CHEMBL2380673         | 3.631                       | Inactive | CHEMBL4082785         | 4.301                       | Inactive |
| CHEMBL3087674         | 2.778                       | Inactive | CHEMBL219405          | 2.490                       | Inactive | CHEMBL4072258         | 3.045                       | Inactive |
| CHEMBL1289392         | 4.049                       | Inactive | CHEMBL4164186         | 2.812                       | Inactive | CHEMBL309490          | 1.079                       | Active   |
| CHEMBL3765697         | 3.061                       | Inactive | CHEMBL3822890         | 3.551                       | Inactive | CHEMBL3752356         | 1.800                       | Active   |
| CHEMBL3763778         | 3.097                       | Inactive | CHEMBL3343705         | 2.455                       | Inactive | CHEMBL1773478         | 2.322                       | Inactive |
| CHEMBL1085526         | 1.068                       | Active   | CHEMBL3416995         | 2.761                       | Inactive | CHEMBL1773480         | 2.857                       | Inactive |
| CHEMBL2238005         | 2.708                       | Inactive | CHEMBL1201217         | 2.258                       | Inactive | CHEMBL2297278         | 4.039                       | Inactive |
| CHEMBL2237998         | 4.281                       | Inactive | CHEMBL1801816         | 3.771                       | Inactive | CHEMBL128392          | 2.398                       | Inactive |
| CHEMBL3133440         | 3.476                       | Inactive | CHEMBL3335027         | 3.908                       | Inactive | CHEMBL4069776         | 2.447                       | Inactive |
| CHEMBL2238001         | 4.006                       | Inactive | CHEMBL2064469         | 2.288                       | Inactive | CHEMBL2375482         | 3.250                       | Inactive |
| CHEMBL1773479         | 2.740                       | Inactive | CHEMBL2064468         | 1.610                       | Active   | CHEMBL151763          | 4.547                       | Inactive |
| CHEMBL1773485         | 1.833                       | Active   | CHEMBL2064404         | 1.713                       | Active   | CHEMBL3335072         | 4.328                       | Inactive |
| CHEMBL2147461         | 0.606                       | Active   | CHEMBL887             | 1.279                       | Active   | CHEMBL3335071         | 3.914                       | Inactive |
| CHEMBL243274          | 1.857                       | Active   | CHEMBL164660          | 3.812                       | Inactive | CHEMBL3335069         | 3.919                       | Inactive |
| CHEMBL1459580         | 1.477                       | Active   | CHEMBL3116292         | 3.826                       | Inactive | CHEMBL3335068         | 3.041                       | Inactive |
| CHEMBL3978533         | 3.760                       | Inactive | CHEMBL2047223         | 3.886                       | Inactive | CHEMBL3335053         | 4.137                       | Inactive |
| CHEMBL209863          | 3.506                       | Inactive | CHEMBL4068888         | 1.650                       | Active   | CHEMBL3335030         | 3.863                       | Inactive |
| CHEMBL427232          | 1.322                       | Active   | CHEMBL4129007         | 4.099                       | Inactive | CHEMBL2238007         | 4.364                       | Inactive |
| CHEMBL380050          | 2.454                       | Inactive | CHEMBL128551          | 1.146                       | Active   | CHEMBL2419690         | 3.863                       | Inactive |

Table S1. (Cont.)

| Molecule<br>ChEMBL ID | logIC <sub>50</sub><br>(nM) | Label    | Molecule<br>ChEMBL ID | logIC <sub>50</sub><br>(nM) | Label    | Molecule<br>ChEMBL ID | logIC <sub>50</sub><br>(nM) | Label    |
|-----------------------|-----------------------------|----------|-----------------------|-----------------------------|----------|-----------------------|-----------------------------|----------|
| CHEMBL3586197         | 4.028                       | Inactive | CHEMBL1819177         | 1.083                       | Active   | CHEMBL3289925         | 4.615                       | Inactive |
| CHEMBL259523          | 3.763                       | Inactive | CHEMBL491526          | 3.375                       | Inactive | CHEMBL3338991         | 4.020                       | Inactive |
| CHEMBL4291845         | 3.322                       | Inactive | CHEMBL4128454         | 3.942                       | Inactive | CHEMBL1773491         | 2.041                       | Inactive |
| CHEMBL2419688         | 1.114                       | Active   | CHEMBL4129420         | 3.946                       | Inactive | CHEMBL3334506         | 4.152                       | Inactive |
| CHEMBL490507          | 2.663                       | Inactive | CHEMBL340807          | 4.375                       | Inactive | CHEMBL3335047         | 3.690                       | Inactive |
| CHEMBL4203672         | 2.076                       | Inactive | CHEMBL2237996         | 3.916                       | Inactive | CHEMBL3335029         | 3.114                       | Inactive |
| CHEMBL4202784         | 2.467                       | Inactive | CHEMBL3360757         | 4.546                       | Inactive | CHEMBL3353041         | 1.243                       | Active   |
| CHEMBL1766147         | 4.100                       | Inactive | CHEMBL2391486         | 1.964                       | Active   | CHEMBL4290992         | 4.146                       | Inactive |
| CHEMBL3086278         | 2.013                       | Inactive | CHEMBL2413740         | 3.942                       | Inactive | CHEMBL365904          | 1.602                       | Active   |
| CHEMBL2206899         | 3.603                       | Inactive | CHEMBL3353568         | 4.833                       | Inactive | CHEMBL2147462         | 0.547                       | Active   |
| CHEMBL3133433         | 2.519                       | Inactive | CHEMBL3322162         | 4.196                       | Inactive | CHEMBL204895          | 2.000                       | Inactive |
| CHEMBL2147460         | 0.714                       | Active   | CHEMBL3770866         | 3.898                       | Inactive | CHEMBL3763973         | 3.549                       | Inactive |
| CHEMBL469638          | 4.303                       | Inactive | CHEMBL3763535         | 3.137                       | Inactive | CHEMBL3765093         | 3.143                       | Inactive |
| CHEMBL4174269         | 2.851                       | Inactive | CHEMBL3343922         | 1.963                       | Active   | CHEMBL4125708         | 4.422                       | Inactive |
| CHEMBL3410952         | 2.728                       | Inactive | CHEMBL3356952         | 0.951                       | Active   | CHEMBL4100407         | 2.160                       | Inactive |
| CHEMBL3233991         | 4.732                       | Inactive | CHEMBL3356529         | 3.789                       | Inactive | CHEMBL2297277         | 4.210                       | Inactive |
| CHEMBL1834071         | 4.307                       | Inactive | CHEMBL3343928         | 2.721                       | Inactive | CHEMBL2047226         | 3.996                       | Inactive |
| CHEMBL2238006         | 4.245                       | Inactive | CHEMBL470907          | 2.756                       | Inactive | CHEMBL3343923         | 2.201                       | Inactive |
| CHEMBL2206897         | 3.545                       | Inactive | CHEMBL3343924         | 2.486                       | Inactive | CHEMBL3115027         | 4.035                       | Inactive |
| CHEMBL2206891         | 2.477                       | Inactive | CHEMBL3343926         | 2.272                       | Inactive | CHEMBL3115040         | 3.599                       | Inactive |
| CHEMBL3885186         | 1.111                       | Active   | CHEMBL3770203         | 3.763                       | Inactive | CHEMBL4103604         | 4.519                       | Inactive |
| CHEMBL1912060         | 0.425                       | Active   | CHEMBL3771233         | 3.826                       | Inactive | CHEMBL611732          | 4.490                       | Inactive |
| CHEMBL4064773         | 3.940                       | Inactive | CHEMBL3769537         | 3.771                       | Inactive | CHEMBL2413559         | 3.328                       | Inactive |
| CHEMBL3289927         | 1.623                       | Active   | CHEMBL239618          | 3.799                       | Inactive | CHEMBL3122168         | 2.745                       | Inactive |
| CHEMBL394753          | 3.869                       | Inactive | CHEMBL4242359         | 1.511                       | Active   | CHEMBL2419687         | 1.732                       | Active   |
| CHEMBL3763832         | 3.777                       | Inactive | CHEMBL3632988         | 2.322                       | Inactive | CHEMBL2419682         | 3.643                       | Inactive |
| CHEMBL3765569         | 3.511                       | Inactive | CHEMBL4285714         | 2.869                       | Inactive | CHEMBL3343713         | 2.591                       | Inactive |
| CHEMBL3818992         | 3.243                       | Inactive | CHEMBL4213147         | 2.491                       | Inactive | CHEMBL2425413         | 4.610                       | Inactive |
| CHEMBL4294109         | 3.100                       | Inactive | CHEMBL4217666         | 1.124                       | Active   | CHEMBL2160227         | 2.380                       | Inactive |
| CHEMBL4293015         | 3.152                       | Inactive | CHEMBL4091683         | 2.833                       | Inactive | CHEMBL2160221         | 4.724                       | Inactive |
| CHEMBL4214951         | 3.666                       | Inactive | CHEMBL3901794         | 3.255                       | Inactive | CHEMBL3415558         | 2.305                       | Inactive |
| CHEMBL4203538         | 3.267                       | Inactive | CHEMBL2419684         | 1.491                       | Active   | CHEMBL3415563         | 2.225                       | Inactive |
| CHEMBL4209755         | 2.691                       | Inactive | CHEMBL1783520         | 1.778                       | Active   | CHEMBL3415569         | 3.501                       | Inactive |
| CHEMBL4204913         | 3.904                       | Inactive | CHEMBL3597054         | 3.714                       | Inactive | CHEMBL3415578         | 2.204                       | Inactive |
| CHEMBL4281440         | 1.724                       | Active   | CHEMBL295124          | 2.000                       | Inactive | CHEMBL3415580         | 2.814                       | Inactive |
| CHEMBL4289981         | 3.540                       | Inactive | CHEMBL2413737         | 4.111                       | Inactive | CHEMBL3600554         | 1.004                       | Active   |
| CHEMBL577016          | 3.708                       | Inactive | CHEMBL2011405         | 4.360                       | Inactive | CHEMBL3263728         | 3.398                       | Inactive |
| CHEMBL4102718         | 4.619                       | Inactive | CHEMBL4068340         | 4.161                       | Inactive | CHEMBL4064846         | 4.613                       | Inactive |
| CHEMBL4066908         | 3.653                       | Inactive | CHEMBL3086279         | 2.212                       | Inactive | CHEMBL4078463         | 4.375                       | Inactive |
| CHEMBL4075667         | 3.079                       | Inactive | CHEMBL4072825         | 2.892                       | Inactive | CHEMBL3237520         | 3.563                       | Inactive |
| CHEMBL3586592         | 2.978                       | Inactive | CHEMBL1773490         | 2.908                       | Inactive | CHEMBL1080386         | 0.778                       | Active   |
| CHEMBL2413739         | 3.904                       | Inactive | CHEMBL224553          | 3.498                       | Inactive | CHEMBL3335070         | 4.438                       | Inactive |
| CHEMBL3417004         | 1.380                       | Active   | CHEMBL4070462         | 3.857                       | Inactive | CHEMBL3335059         | 4.467                       | Inactive |
| CHEMBL89354           | 1.164                       | Active   | CHEMBL1773481         | 2.336                       | Inactive | CHEMBL3335058         | 4.301                       | Inactive |
| CHEMBL3137700         | 2.455                       | Inactive | CHEMBL1773489         | 2.322                       | Inactive | CHEMBL3417006         | 3.013                       | Inactive |
| CHEMBL3133436         | 2.944                       | Inactive | CHEMBL3323068         | 4.083                       | Inactive | CHEMBL3335063         | 4.320                       | Inactive |
| CHEMBL3133443         | 3.386                       | Inactive | CHEMBL240047          | 3.851                       | Inactive | CHEMBL3415565         | 2.517                       | Inactive |
| CHEMBL2007996         | -0.131                      | Active   | CHEMBL4129147         | 4.385                       | Inactive | CHEMBL3415573         | 2.412                       | Inactive |
| CHEMBL1916768         | 4.658                       | Inactive | CHEMBL4070182         | 2.903                       | Inactive | CHEMBL4089033         | 3.615                       | Inactive |
| CHEMBL4161860         | 3.501                       | Inactive | CHEMBL4172587         | 3.688                       | Inactive | CHEMBL3884988         | 1.639                       | Active   |

Table S1. (Cont.)

| Molecule<br>ChEMBL ID | logIC <sub>50</sub><br>(nM) | Label    | Molecule<br>ChEMBL ID | logIC <sub>50</sub><br>(nM) | Label    | Molecule<br>ChEMBL ID | logIC <sub>50</sub><br>(nM) | Label    |
|-----------------------|-----------------------------|----------|-----------------------|-----------------------------|----------|-----------------------|-----------------------------|----------|
| CHEMBL4070769         | 3.623                       | Inactive | CHEMBL3819320         | 3.004                       | Inactive | CHEMBL3585776         | -1.571                      | Active   |
| CHEMBL3322156         | 2.600                       | Inactive | CHEMBL3586207         | 2.342                       | Inactive | CHEMBL3754291         | 1.687                       | Active   |
| CHEMBL3322161         | 3.912                       | Inactive | CHEMBL2332545         | 3.830                       | Inactive | CHEMBL3753706         | 2.489                       | Inactive |
| CHEMBL3415579         | 3.303                       | Inactive | CHEMBL4104459         | 3.820                       | Inactive | CHEMBL3752451         | 2.627                       | Inactive |
| CHEMBL3115035         | 3.885                       | Inactive | CHEMBL4071803         | 4.700                       | Inactive | CHEMBL4210729         | 1.622                       | Active   |
| CHEMBL3115032         | 3.791                       | Inactive | CHEMBL3237527         | 3.365                       | Inactive | CHEMBL4213591         | 1.713                       | Active   |
| CHEMBL3116296         | 3.799                       | Inactive | CHEMBL3400187         | 1.334                       | Active   | CHEMBL1344483         | 4.653                       | Inactive |
| CHEMBL3116293         | 3.914                       | Inactive | CHEMBL3338992         | 3.952                       | Inactive | CHEMBL4285481         | 2.491                       | Inactive |
| CHEMBL3930722         | 3.130                       | Inactive | CHEMBL4068410         | 2.881                       | Inactive | CHEMBL3586198         | 3.999                       | Inactive |
| CHEMBL3824057         | 3.895                       | Inactive | CHEMBL3824248         | 2.436                       | Inactive | CHEMBL4165299         | 3.947                       | Inactive |
| CHEMBL3414597         | 2.972                       | Inactive | CHEMBL4074655         | 2.300                       | Inactive | CHEMBL3585374         | 2.279                       | Inactive |
| CHEMBL3356535         | 2.013                       | Inactive | CHEMBL4205954         | -1.878                      | Active   | CHEMBL3586576         | 2.898                       | Inactive |
| CHEMBL3763203         | 3.009                       | Inactive | CHEMBL4214430         | -1.777                      | Active   | CHEMBL3335061         | 4.057                       | Inactive |
| CHEMBL3765162         | 3.686                       | Inactive | CHEMBL1289391         | 3.623                       | Inactive | CHEMBL3335055         | 3.940                       | Inactive |
| CHEMBL3754480         | 2.509                       | Inactive | CHEMBL1289719         | 3.881                       | Inactive | CHEMBL3335050         | 3.000                       | Inactive |
| CHEMBL3752467         | -0.066                      | Active   | CHEMBL3290193         | 4.822                       | Inactive | CHEMBL3335049         | 3.792                       | Inactive |
| CHEMBL3753405         | 0.408                       | Active   | CHEMBL4087978         | 3.193                       | Inactive | CHEMBL3335046         | 3.633                       | Inactive |
| CHEMBL3338996         | 4.366                       | Inactive | CHEMBL3310706         | 4.670                       | Inactive | CHEMBL3335026         | 3.778                       | Inactive |
| CHEMBL3339006         | 4.341                       | Inactive | CHEMBL4216066         | 1.814                       | Active   | CHEMBL2409141         | 4.083                       | Inactive |
| CHEMBL3356533         | 0.732                       | Active   | CHEMBL3415643         | 2.431                       | Inactive | CHEMBL2396912         | 4.772                       | Inactive |
| CHEMBL3585779         | -1.571                      | Active   | CHEMBL4096963         | 3.568                       | Inactive | CHEMBL3586199         | 2.959                       | Inactive |
| CHEMBL3585782         | -1.571                      | Active   | CHEMBL4094981         | 3.262                       | Inactive | CHEMBL3971112         | 4.100                       | Inactive |
| CHEMBL3356539         | 2.542                       | Inactive | CHEMBL4059684         | 3.502                       | Inactive | CHEMBL3237632         | 4.838                       | Inactive |
| CHEMBL3754631         | 4.342                       | Inactive | CHEMBL4072405         | 3.288                       | Inactive | CHEMBL3289924         | 4.094                       | Inactive |
| CHEMBL3393674         | 4.342                       | Inactive | CHEMBL3818689         | 2.415                       | Inactive | CHEMBL3289942         | 4.899                       | Inactive |
| CHEMBL3323035         | 1.530                       | Active   | CHEMBL4098654         | 1.799                       | Active   | CHEMBL1327885         | 3.792                       | Inactive |
| CHEMBL3115039         | 3.942                       | Inactive | CHEMBL4205374         | 2.272                       | Inactive | CHEMBL2332977         | 3.614                       | Inactive |
| CHEMBL4278287         | 1.580                       | Active   | CHEMBL4205426         | 0.725                       | Active   | CHEMBL2047530         | 1.952                       | Active   |
| CHEMBL3950130         | 2.991                       | Inactive | CHEMBL4203988         | 1.025                       | Active   | CHEMBL4204901         | 2.885                       | Inactive |
| CHEMBL3752119         | 1.509                       | Active   | CHEMBL4061837         | 3.881                       | Inactive | CHEMBL4206484         | 2.288                       | Inactive |
| CHEMBL3356531         | 1.730                       | Active   | CHEMBL4077088         | 3.799                       | Inactive | CHEMBL2332980         | 4.298                       | Inactive |
| CHEMBL4167524         | 1.431                       | Active   | CHEMBL1626455         | 3.903                       | Inactive | CHEMBL2332978         | 4.303                       | Inactive |
| CHEMBL4160310         | 2.965                       | Inactive | CHEMBL4160696         | 2.966                       | Inactive | CHEMBL4159705         | 0.431                       | Active   |
| CHEMBL3597008         | 3.697                       | Inactive | CHEMBL3764065         | 3.804                       | Inactive | CHEMBL3818374         | 4.102                       | Inactive |
| CHEMBL4062800         | 2.230                       | Inactive | CHEMBL3763482         | 3.569                       | Inactive | CHEMBL4105158         | 3.134                       | Inactive |
| CHEMBL511921          | 2.310                       | Inactive | CHEMBL3765496         | 3.598                       | Inactive | CHEMBL4095695         | 4.288                       | Inactive |
| CHEMBL3948489         | 2.863                       | Inactive | CHEMBL4167958         | 4.763                       | Inactive | CHEMBL4095445         | 3.881                       | Inactive |
| CHEMBL3115026         | 3.533                       | Inactive | CHEMBL3093791         | 1.180                       | Active   | CHEMBL3338995         | 4.352                       | Inactive |
| CHEMBL3115023         | 4.144                       | Inactive | CHEMBL3087675         | 3.980                       | Inactive | CHEMBL3769555         | 3.792                       | Inactive |
| CHEMBL4080216         | 4.904                       | Inactive | CHEMBL4289086         | 4.114                       | Inactive | CHEMBL4090751         | 2.600                       | Inactive |
| CHEMBL4077169         | 4.090                       | Inactive | CHEMBL3632987         | 2.415                       | Inactive | CHEMBL4129940         | 4.052                       | Inactive |
| CHEMBL4075624         | 4.223                       | Inactive | CHEMBL3632991         | 2.079                       | Inactive | CHEMBL2047231         | 4.013                       | Inactive |
| CHEMBL4080105         | 2.851                       | Inactive | CHEMBL3582203         | 3.613                       | Inactive | CHEMBL2047225         | 3.944                       | Inactive |
| CHEMBL4081013         | 3.919                       | Inactive | CHEMBL2332548         | 4.243                       | Inactive | CHEMBL1834062         | 4.279                       | Inactive |
| CHEMBL4083524         | 3.748                       | Inactive | CHEMBL3116298         | 3.934                       | Inactive | CHEMBL4072457         | 4.845                       | Inactive |
| CHEMBL4105088         | 3.892                       | Inactive | CHEMBL3133430         | 3.121                       | Inactive | CHEMBL23838           | 1.000                       | Active   |
| CHEMBL4094911         | 3.929                       | Inactive | CHEMBL3415575         | 2.581                       | Inactive | CHEMBL4077952         | 1.301                       | Active   |
| CHEMBL4096673         | 4.097                       | Inactive | CHEMBL1834067         | 3.991                       | Inactive | CHEMBL4060687         | 3.934                       | Inactive |
| CHEMBL4099790         | 3.833                       | Inactive | CHEMBL1834073         | 4.164                       | Inactive | CHEMBL4073193         | 3.857                       | Inactive |
| CHEMBL3919086         | 3.669                       | Inactive | CHEMBL3585778         | -1.571                      | Active   | CHEMBL4060016         | 3.869                       | Inactive |

Table S1. (Cont.)

| Molecule<br>ChEMBL ID | logIC <sub>50</sub><br>(nM) | Label    | Molecule<br>ChEMBL ID | logIC <sub>50</sub><br>(nM) | Label    | Molecule<br>ChEMBL ID | logIC <sub>50</sub><br>(nM) | Label    |
|-----------------------|-----------------------------|----------|-----------------------|-----------------------------|----------|-----------------------|-----------------------------|----------|
| CHEMBL4173258         | 2.724                       | Inactive | CHEMBL3115045         | 3.788                       | Inactive | CHEMBL4282154         | 0.322                       | Active   |
| CHEMBL4210949         | 3.491                       | Inactive | CHEMBL2297279         | 1.079                       | Active   | CHEMBL4217660         | 2.255                       | Inactive |
| CHEMBL4218997         | 3.763                       | Inactive | CHEMBL2234843         | 3.260                       | Inactive | CHEMBL4215154         | 1.952                       | Active   |
| CHEMBL4207876         | 3.813                       | Inactive | CHEMBL4240861         | 1.167                       | Active   | CHEMBL4217617         | 3.185                       | Inactive |
| CHEMBL3955393         | 3.286                       | Inactive | CHEMBL3338386         | 2.996                       | Inactive | CHEMBL4212151         | 3.422                       | Inactive |
| CHEMBL4218829         | 1.487                       | Active   | CHEMBL4082959         | 2.420                       | Inactive | CHEMBL4168710         | 3.790                       | Inactive |
| CHEMBL4208866         | -1.547                      | Active   | CHEMBL4165471         | 4.893                       | Inactive | CHEMBL4093408         | 4.365                       | Inactive |
| CHEMBL4128985         | 4.399                       | Inactive | CHEMBL4059887         | 3.778                       | Inactive | CHEMBL4086323         | 3.997                       | Inactive |
| CHEMBL4128061         | 3.767                       | Inactive | CHEMBL4203653         | 3.508                       | Inactive | CHEMBL4085283         | 4.570                       | Inactive |
| CHEMBL4277644         | 3.400                       | Inactive | CHEMBL4094805         | 3.121                       | Inactive | CHEMBL4093019         | 3.793                       | Inactive |
| CHEMBL4089082         | 2.041                       | Inactive | CHEMBL4069184         | 2.708                       | Inactive | CHEMBL4100736         | 3.464                       | Inactive |
| CHEMBL3582215         | 2.204                       | Inactive | CHEMBL4099046         | 3.940                       | Inactive | CHEMBL3338389         | 1.778                       | Active   |
| CHEMBL3585784         | -1.571                      | Active   | CHEMBL4078382         | 3.875                       | Inactive | CHEMBL4209420         | 2.746                       | Inactive |
| CHEMBL2158994         | 3.670                       | Inactive | CHEMBL4177242         | 3.288                       | Inactive | CHEMBL4287826         | 3.534                       | Inactive |
| CHEMBL3338994         | 4.154                       | Inactive | CHEMBL4089264         | 2.771                       | Inactive | CHEMBL4284047         | 0.097                       | Active   |
| CHEMBL3339001         | 3.772                       | Inactive | CHEMBL4172271         | 4.552                       | Inactive | CHEMBL4210274         | 4.871                       | Inactive |
| CHEMBL3600551         | 0.283                       | Active   | CHEMBL3917990         | 3.600                       | Inactive | CHEMBL4217139         | 1.565                       | Active   |
| CHEMBL3416996         | 1.839                       | Active   | CHEMBL4287340         | 3.690                       | Inactive | CHEMBL4100338         | 3.602                       | Inactive |
| CHEMBL4216806         | 3.734                       | Inactive | CHEMBL4291697         | 3.250                       | Inactive | CHEMBL4092602         | 3.591                       | Inactive |
| CHEMBL4063663         | 4.386                       | Inactive | CHEMBL4164981         | 2.385                       | Inactive | CHEMBL4091651         | 3.756                       | Inactive |
| CHEMBL3585783         | -1.571                      | Active   | CHEMBL4293364         | 3.057                       | Inactive | CHEMBL4062146         | 3.820                       | Inactive |
| CHEMBL3115196         | 3.880                       | Inactive | CHEMBL4128040         | 4.292                       | Inactive | CHEMBL4097877         | 4.865                       | Inactive |
| CHEMBL4091851         | 2.778                       | Inactive | CHEMBL4286736         | 3.387                       | Inactive | CHEMBL1917825         | 3.342                       | Inactive |
| CHEMBL2419686         | 2.491                       | Inactive | CHEMBL4217663         | -1.849                      | Active   | CHEMBL4090159         | 3.866                       | Inactive |
| CHEMBL3582208         | 2.850                       | Inactive | CHEMBL4214707         | -1.679                      | Active   | CHEMBL4286806         | 3.735                       | Inactive |
| CHEMBL3582214         | 1.255                       | Active   | CHEMBL4067562         | 4.278                       | Inactive | CHEMBL4282755         | 3.994                       | Inactive |
| CHEMBL3115034         | 3.645                       | Inactive | CHEMBL4209795         | 2.035                       | Inactive | CHEMBL3785861         | 2.930                       | Inactive |
| CHEMBL3115197         | 3.420                       | Inactive | CHEMBL4292766         | 2.875                       | Inactive | CHEMBL4204315         | 0.422                       | Active   |
| CHEMBL4205651         | 2.723                       | Inactive | CHEMBL4284580         | 3.966                       | Inactive | CHEMBL4292349         | 3.539                       | Inactive |
| CHEMBL4287962         | 3.940                       | Inactive | CHEMBL4293626         | 3.507                       | Inactive | CHEMBL4175914         | 3.919                       | Inactive |
| CHEMBL4279297         | 2.322                       | Inactive | CHEMBL3234587         | 2.415                       | Inactive | CHEMBL4280241         | 3.517                       | Inactive |
| CHEMBL4289908         | 3.772                       | Inactive | CHEMBL3234593         | 2.176                       | Inactive | CHEMBL4074258         | 4.046                       | Inactive |
| CHEMBL4069385         | 3.854                       | Inactive | CHEMBL3765098         | 3.795                       | Inactive | CHEMBL4277879         | 3.862                       | Inactive |
| CHEMBL4098132         | 3.615                       | Inactive | CHEMBL3752384         | 2.346                       | Inactive | CHEMBL4285818         | 3.149                       | Inactive |
| CHEMBL3786719         | 1.568                       | Active   | CHEMBL3754672         | 2.301                       | Inactive | CHEMBL4217346         | 1.974                       | Active   |
| CHEMBL4293418         | 0.556                       | Active   | CHEMBL1773484         | 2.029                       | Inactive | CHEMBL4214755         | 3.441                       | Inactive |
| CHEMBL4284475         | 2.991                       | Inactive | CHEMBL4213253         | -1.723                      | Active   | CHEMBL3891025         | 3.920                       | Inactive |
| CHEMBL3582231         | 3.016                       | Inactive | CHEMBL4209803         | -1.869                      | Active   | CHEMBL4281727         | 3.581                       | Inactive |
| CHEMBL4060800         | 3.643                       | Inactive | CHEMBL4205144         | -1.586                      | Active   | CHEMBL4063877         | 1.680                       | Active   |
| CHEMBL2413558         | 4.370                       | Inactive | CHEMBL4099598         | 3.806                       | Inactive | CHEMBL4293155         | 3.387                       | Inactive |
| CHEMBL3945423         | 3.037                       | Inactive | CHEMBL4286556         | 3.567                       | Inactive | CHEMBL4214417         | 3.415                       | Inactive |
| CHEMBL4060832         | 4.614                       | Inactive | CHEMBL4278046         | 3.663                       | Inactive | CHEMBL4213042         | 0.352                       | Active   |
| CHEMBL4098808         | 4.445                       | Inactive | CHEMBL4280753         | 4.940                       | Inactive | CHEMBL4208392         | 3.511                       | Inactive |
| CHEMBL3786448         | 1.199                       | Active   | CHEMBL4284506         | 4.968                       | Inactive | CHEMBL4212229         | 3.861                       | Inactive |
| CHEMBL4076034         | 3.342                       | Inactive | CHEMBL4283463         | 3.931                       | Inactive | CHEMBL239400          | 3.903                       | Inactive |
| CHEMBL4060617         | 2.403                       | Inactive | CHEMBL4294859         | 3.549                       | Inactive | CHEMBL3765476         | 3.528                       | Inactive |
| CHEMBL4241840         | 1.644                       | Active   | CHEMBL4085114         | 3.845                       | Inactive | CHEMBL4125722         | 3.856                       | Inactive |
| CHEMBL4102562         | 4.420                       | Inactive | CHEMBL2413733         | 4.091                       | Inactive | CHEMBL3819548         | 2.653                       | Inactive |
| CHEMBL3115036         | 3.788                       | Inactive | CHEMBL4098421         | 3.863                       | Inactive | CHEMBL4293305         | 2.763                       | Inactive |
| CHEMBL3115031         | 3.715                       | Inactive | CHEMBL456881          | 4.796                       | Inactive | CHEMBL4278260         | 3.444                       | Inactive |

Table S1. (Cont.)

| Molecule<br>ChEMBL ID | logIC <sub>50</sub><br>(nM) | Label    | Molecule<br>ChEMBL ID | logIC <sub>50</sub><br>(nM) | Label    | Molecule<br>ChEMBL ID | logIC <sub>50</sub><br>(nM) | Label    |
|-----------------------|-----------------------------|----------|-----------------------|-----------------------------|----------|-----------------------|-----------------------------|----------|
| CHEMBL4290039         | 1.342                       | Active   | CHEMBL3752232         | 3.708                       | Inactive | CHEMBL4164524         | 2.185                       | Inactive |
| CHEMBL3983017         | 2.919                       | Inactive | CHEMBL4208869         | 1.382                       | Active   | CHEMBL4285759         | 4.006                       | Inactive |
| CHEMBL3972865         | 3.356                       | Inactive | CHEMBL4276675         | 1.519                       | Active   | CHEMBL4172510         | 3.606                       | Inactive |
| CHEMBL3958208         | 3.170                       | Inactive | CHEMBL4171637         | 4.986                       | Inactive | CHEMBL4216666         | 3.362                       | Inactive |
| CHEMBL4127747         | 4.037                       | Inactive | CHEMBL4202749         | 1.225                       | Active   | CHEMBL4064904         | 3.633                       | Inactive |
| CHEMBL4092562         | 3.137                       | Inactive | CHEMBL4285581         | 1.362                       | Active   | CHEMBL4290877         | 3.346                       | Inactive |
| CHEMBL4068935         | 3.097                       | Inactive | CHEMBL3417009         | 1.204                       | Active   | CHEMBL4166300         | 1.146                       | Active   |
| CHEMBL4283814         | 3.708                       | Inactive | CHEMBL4278164         | 2.114                       | Inactive | CHEMBL4164078         | 2.785                       | Inactive |
| CHEMBL4164540         | 2.949                       | Inactive | CHEMBL4208322         | 1.326                       | Active   | CHEMBL4174290         | 4.029                       | Inactive |
| CHEMBL4077157         | 2.360                       | Inactive | CHEMBL4207386         | 1.413                       | Active   | CHEMBL4159640         | 3.064                       | Inactive |
| CHEMBL4174729         | 2.322                       | Inactive | CHEMBL4284619         | 4.255                       | Inactive | CHEMBL4101303         | 3.727                       | Inactive |
| CHEMBL4283189         | 3.648                       | Inactive | CHEMBL4276694         | 4.279                       | Inactive | CHEMBL4159074         | 3.924                       | Inactive |
| CHEMBL4291046         | 2.934                       | Inactive | CHEMBL4217746         | 1.403                       | Active   | CHEMBL4278686         | 0.806                       | Active   |
| CHEMBL4279249         | 3.777                       | Inactive | CHEMBL4283390         | 3.348                       | Inactive | CHEMBL4283651         | 3.550                       | Inactive |
| CHEMBL4287595         | 2.959                       | Inactive | CHEMBL4225157         | 0.000                       | Active   | CHEMBL4279488         | 3.140                       | Inactive |
| CHEMBL4295126         | 3.124                       | Inactive | CHEMBL4205425         | -1.961                      | Active   | CHEMBL4290236         | 3.520                       | Inactive |
| CHEMBL4282414         | 3.786                       | Inactive | CHEMBL4243474         | 1.474                       | Active   | CHEMBL4216601         | 3.978                       | Inactive |
| CHEMBL4214668         | 2.111                       | Inactive | CHEMBL4213792         | -0.292                      | Active   | CHEMBL709             | 1.255                       | Active   |
| CHEMBL3921061         | 2.940                       | Inactive | CHEMBL4210041         | -1.666                      | Active   | CHEMBL4284895         | 3.303                       | Inactive |
| CHEMBL4289362         | 2.771                       | Inactive | CHEMBL3787502         | 1.350                       | Active   | CHEMBL4217126         | 3.350                       | Inactive |
| CHEMBL4277357         | 4.756                       | Inactive | CHEMBL4292192         | 4.807                       | Inactive | CHEMBL4159609         | 2.462                       | Inactive |
| CHEMBL4168299         | 4.452                       | Inactive | CHEMBL3965783         | 2.996                       | Inactive | CHEMBL4291400         | 4.301                       | Inactive |
| CHEMBL4215217         | 1.872                       | Active   | CHEMBL4210517         | 2.076                       | Inactive | CHEMBL4282037         | 3.086                       | Inactive |
| CHEMBL4294640         | -0.022                      | Active   | CHEMBL85251           | 2.605                       | Inactive | CHEMBL4285972         | 4.000                       | Inactive |
| CHEMBL4288282         | 3.326                       | Inactive | CHEMBL4281066         | 3.210                       | Inactive |                       |                             |          |
| CHEMBL4163781         | 4.999                       | Inactive | CHEMBL4244803         | 1.326                       | Active   |                       |                             |          |

Table S2. Molecule ChEMBL ID (<https://www.ebi.ac.uk/chembl/>) and labels of 1549 compounds in BACE1 database

| Molecule<br>ChEMBL ID | logIC <sub>50</sub><br>(nM) | Label    | Molecule<br>ChEMBL ID | logIC <sub>50</sub><br>(nM) | Label    | Molecule<br>ChEMBL ID | logIC <sub>50</sub><br>(nM) | Label    |
|-----------------------|-----------------------------|----------|-----------------------|-----------------------------|----------|-----------------------|-----------------------------|----------|
| CHEMBL2181911         | 0.740                       | Active   | CHEMBL2047892         | 2.114                       | Inactive | CHEMBL3753957         | 2.279                       | Inactive |
| CHEMBL2181890         | 0.982                       | Active   | CHEMBL509486          | 4.566                       | Inactive | CHEMBL208060          | 0.806                       | Active   |
| CHEMBL2177328         | 3.441                       | Inactive | CHEMBL2380459         | 3.505                       | Inactive | CHEMBL1762553         | 3.915                       | Inactive |
| CHEMBL2177330         | 3.193                       | Inactive | CHEMBL2380446         | 2.799                       | Inactive | CHEMBL1957479         | 3.530                       | Inactive |
| CHEMBL2177332         | 2.954                       | Inactive | CHEMBL583888          | 2.322                       | Inactive | CHEMBL1957480         | 1.890                       | Active   |
| CHEMBL2177333         | 2.869                       | Inactive | CHEMBL567653          | 3.914                       | Inactive | CHEMBL454662          | 3.217                       | Inactive |
| CHEMBL1821816         | 2.987                       | Inactive | CHEMBL584521          | 2.000                       | Inactive | CHEMBL1923294         | 2.910                       | Inactive |
| CHEMBL1821817         | 1.204                       | Active   | CHEMBL582044          | 4.580                       | Inactive | CHEMBL3640259         | 1.580                       | Active   |
| CHEMBL1821728         | -0.155                      | Active   | CHEMBL598876          | 2.114                       | Inactive | CHEMBL3640274         | 2.057                       | Inactive |
| CHEMBL1821826         | 1.204                       | Active   | CHEMBL2403772         | 1.491                       | Active   | CHEMBL3261082         | 1.362                       | Active   |
| CHEMBL2177916         | 2.130                       | Inactive | CHEMBL2181914         | 0.991                       | Active   | CHEMBL3645153         | 2.230                       | Inactive |
| CHEMBL2177905         | 2.137                       | Inactive | CHEMBL2181831         | 2.158                       | Inactive | CHEMBL2177479         | 3.342                       | Inactive |
| CHEMBL2177321         | 3.846                       | Inactive | CHEMBL2314791         | 3.690                       | Inactive | CHEMBL28              | 4.585                       | Inactive |
| CHEMBL3261047         | 1.301                       | Active   | CHEMBL378225          | 1.299                       | Active   | CHEMBL1412710         | 4.310                       | Inactive |
| CHEMBL3261048         | 1.919                       | Active   | CHEMBL1934195         | 3.996                       | Inactive | CHEMBL2181979         | 4.933                       | Inactive |
| CHEMBL190644          | 1.987                       | Active   | CHEMBL2380821         | 0.903                       | Active   | CHEMBL2172798         | 4.533                       | Inactive |
| CHEMBL2047888         | 2.544                       | Inactive | CHEMBL332948          | 1.322                       | Active   | CHEMBL2172796         | 4.146                       | Inactive |

Table S2. (Cont.)

| Molecule<br>ChEMBL ID | logIC <sub>50</sub><br>(nM) | Label    | Molecule<br>ChEMBL ID | logIC <sub>50</sub><br>(nM) | Label    | Molecule<br>ChEMBL ID | logIC <sub>50</sub><br>(nM) | Label    |
|-----------------------|-----------------------------|----------|-----------------------|-----------------------------|----------|-----------------------|-----------------------------|----------|
| CHEMBL2169944         | 4.771                       | Inactive | CHEMBL2347187         | 1.279                       | Active   | CHEMBL3747766         | 2.079                       | Inactive |
| CHEMBL2181910         | 0.756                       | Active   | CHEMBL2347207         | 2.890                       | Inactive | CHEMBL217068          | 3.568                       | Inactive |
| CHEMBL2177908         | 2.297                       | Inactive | CHEMBL1957481         | 1.750                       | Active   | CHEMBL585506          | 1.602                       | Active   |
| CHEMBL51386           | 2.477                       | Inactive | CHEMBL1921816         | 2.740                       | Inactive | CHEMBL1099022         | 3.422                       | Inactive |
| CHEMBL1762678         | 4.367                       | Inactive | CHEMBL3086247         | 3.716                       | Inactive | CHEMBL3746131         | 3.498                       | Inactive |
| CHEMBL2177331         | 2.447                       | Inactive | CHEMBL3086244         | 4.173                       | Inactive | CHEMBL597233          | 3.428                       | Inactive |
| CHEMBL2177340         | 2.029                       | Inactive | CHEMBL2403759         | 3.305                       | Inactive | CHEMBL3261044         | 1.505                       | Active   |
| CHEMBL2180031         | 1.415                       | Active   | CHEMBL2403765         | 1.176                       | Active   | CHEMBL3260840         | 1.886                       | Active   |
| CHEMBL2177912         | 1.631                       | Active   | CHEMBL3086243         | 4.155                       | Inactive | CHEMBL2177917         | 1.895                       | Active   |
| CHEMBL2048058         | 0.301                       | Active   | CHEMBL2177325         | 2.114                       | Inactive | CHEMBL1080086         | 3.681                       | Inactive |
| CHEMBL2048059         | 0.301                       | Active   | CHEMBL2403768         | 1.591                       | Active   | CHEMBL3640220         | 2.230                       | Inactive |
| CHEMBL332260          | 1.699                       | Active   | CHEMBL2403767         | 1.505                       | Active   | CHEMBL3640240         | 2.940                       | Inactive |
| CHEMBL2180034         | 3.146                       | Inactive | CHEMBL2380811         | 2.914                       | Inactive | CHEMBL191344          | 1.398                       | Active   |
| CHEMBL2180018         | 3.544                       | Inactive | CHEMBL3414708         | 2.929                       | Inactive | CHEMBL208808          | 1.716                       | Active   |
| CHEMBL66              | 4.477                       | Inactive | CHEMBL2177327         | 3.704                       | Inactive | CHEMBL3597552         | 3.507                       | Inactive |
| CHEMBL370955          | 1.813                       | Active   | CHEMBL2177310         | 3.290                       | Inactive | CHEMBL3359760         | 0.672                       | Active   |
| CHEMBL370185          | 3.692                       | Inactive | CHEMBL2181881         | 1.310                       | Active   | CHEMBL403268          | -0.398                      | Active   |
| CHEMBL205309          | 1.968                       | Active   | CHEMBL3359755         | -0.046                      | Active   | CHEMBL3359761         | 0.663                       | Active   |
| CHEMBL3813928         | 2.839                       | Inactive | CHEMBL3753360         | 2.792                       | Inactive | CHEMBL3359758         | -0.097                      | Active   |
| CHEMBL567430          | 1.477                       | Active   | CHEMBL1760733         | 3.362                       | Inactive | CHEMBL2177312         | 3.873                       | Inactive |
| CHEMBL3765711         | 2.863                       | Inactive | CHEMBL1760859         | 2.477                       | Inactive | CHEMBL3746656         | 2.863                       | Inactive |
| CHEMBL3765050         | 2.591                       | Inactive | CHEMBL1821812         | 1.531                       | Active   | CHEMBL3354693         | 0.602                       | Active   |
| CHEMBL3763815         | 3.358                       | Inactive | CHEMBL1821825         | 1.000                       | Active   | CHEMBL3354696         | 0.845                       | Active   |
| CHEMBL3640279         | 2.246                       | Inactive | CHEMBL3640253         | 2.158                       | Inactive | CHEMBL3354698         | 0.602                       | Active   |
| CHEMBL252962          | 3.900                       | Inactive | CHEMBL3640280         | 1.934                       | Active   | CHEMBL3354702         | 1.362                       | Active   |
| CHEMBL401141          | 2.775                       | Inactive | CHEMBL3645154         | 2.857                       | Inactive | CHEMBL2396989         | 1.301                       | Active   |
| CHEMBL373533          | 0.699                       | Active   | CHEMBL3640231         | 3.394                       | Inactive | CHEMBL3959813         | 2.204                       | Inactive |
| CHEMBL379334          | 3.097                       | Inactive | CHEMBL3640269         | 2.465                       | Inactive | CHEMBL3640243         | 1.000                       | Active   |
| CHEMBL213904          | 1.898                       | Active   | CHEMBL3747191         | 2.643                       | Inactive | CHEMBL3640250         | 3.775                       | Inactive |
| CHEMBL1957468         | 1.950                       | Active   | CHEMBL2181885         | 1.260                       | Active   | CHEMBL3640227         | 3.330                       | Inactive |
| CHEMBL1957478         | 1.570                       | Active   | CHEMBL3354692         | 0.845                       | Active   | CHEMBL3640234         | 1.903                       | Active   |
| CHEMBL1957483         | 1.500                       | Active   | CHEMBL566969          | 2.869                       | Inactive | CHEMBL2347214         | 1.820                       | Active   |
| CHEMBL291784          | 3.537                       | Inactive | CHEMBL566112          | 1.903                       | Active   | CHEMBL3359753         | 0.079                       | Active   |
| CHEMBL566406          | 1.699                       | Active   | CHEMBL1762557         | 3.953                       | Inactive | CHEMBL3752467         | 3.130                       | Inactive |
| CHEMBL567061          | 1.699                       | Active   | CHEMBL450745          | 3.491                       | Inactive | CHEMBL3354688         | 0.342                       | Active   |
| CHEMBL1087609         | 3.841                       | Inactive | CHEMBL3422246         | 0.845                       | Active   | CHEMBL2380440         | 4.505                       | Inactive |
| CHEMBL589614          | 2.322                       | Inactive | CHEMBL3414701         | 1.785                       | Active   | CHEMBL2380457         | 4.301                       | Inactive |
| CHEMBL508791          | 3.344                       | Inactive | CHEMBL3394044         | 1.267                       | Active   | CHEMBL2380447         | 3.505                       | Inactive |
| CHEMBL3086251         | 3.690                       | Inactive | CHEMBL566011          | 1.301                       | Active   | CHEMBL2380442         | 4.000                       | Inactive |
| CHEMBL2177304         | 0.784                       | Active   | CHEMBL1092786         | 1.602                       | Active   | CHEMBL2380451         | 2.505                       | Inactive |
| CHEMBL2177335         | 2.903                       | Inactive | CHEMBL597277          | 1.477                       | Active   | CHEMBL3265337         | 3.886                       | Inactive |
| CHEMBL2177317         | 1.959                       | Active   | CHEMBL605079          | 3.681                       | Inactive | CHEMBL183494          | 0.914                       | Active   |
| CHEMBL2347203         | 1.708                       | Active   | CHEMBL565995          | 2.114                       | Inactive | CHEMBL202602          | 1.991                       | Active   |
| CHEMBL3653370         | 2.230                       | Inactive | CHEMBL567258          | 1.778                       | Active   | CHEMBL565996          | 1.556                       | Active   |
| CHEMBL584926          | 1.000                       | Active   | CHEMBL2347368         | 2.033                       | Inactive | CHEMBL567687          | 1.778                       | Active   |
| CHEMBL2177914         | 1.559                       | Active   | CHEMBL2181829         | 1.358                       | Active   | CHEMBL566404          | 3.134                       | Inactive |
| CHEMBL2181886         | 1.547                       | Active   | CHEMBL592534          | 3.017                       | Inactive | CHEMBL2047908         | 1.447                       | Active   |
| CHEMBL2180035         | 3.477                       | Inactive | CHEMBL566415          | 2.398                       | Inactive | CHEMBL3394046         | 0.114                       | Active   |
| CHEMBL2181907         | 0.462                       | Active   | CHEMBL116438          | 3.724                       | Inactive | CHEMBL2403774         | 1.785                       | Active   |
| CHEMBL2136098         | 4.435                       | Inactive | CHEMBL3747381         | 2.857                       | Inactive | CHEMBL1923160         | 2.511                       | Inactive |

Table S2. (Cont.)

| Molecule<br>ChEMBL ID | logIC <sub>50</sub><br>(nM) | Label    | Molecule<br>ChEMBL ID | logIC <sub>50</sub><br>(nM) | Label    | Molecule<br>ChEMBL ID | logIC <sub>50</sub><br>(nM) | Label    |
|-----------------------|-----------------------------|----------|-----------------------|-----------------------------|----------|-----------------------|-----------------------------|----------|
| CHEMBL2180033         | 2.491                       | Inactive | CHEMBL1270434         | 1.954                       | Active   | CHEMBL126079          | 3.255                       | Inactive |
| CHEMBL209795          | 2.079                       | Inactive | CHEMBL1270527         | 1.301                       | Active   | CHEMBL189901          | 1.079                       | Active   |
| CHEMBL210414          | 1.301                       | Active   | CHEMBL1270729         | 1.699                       | Active   | CHEMBL363783          | 1.602                       | Active   |
| CHEMBL211563          | 0.602                       | Active   | CHEMBL1271142         | 1.602                       | Active   | CHEMBL191129          | 1.000                       | Active   |
| CHEMBL257735          | 3.130                       | Inactive | CHEMBL1271246         | 1.398                       | Active   | CHEMBL384678          | 2.068                       | Inactive |
| CHEMBL208681          | 3.294                       | Inactive | CHEMBL1271452         | 1.301                       | Active   | CHEMBL211194          | 4.079                       | Inactive |
| CHEMBL213595          | 4.307                       | Inactive | CHEMBL1270028         | 2.079                       | Inactive | CHEMBL379781          | 1.114                       | Active   |
| CHEMBL404078          | 0.778                       | Active   | CHEMBL1270240         | 1.301                       | Active   | CHEMBL1270934         | 1.301                       | Active   |
| CHEMBL256676          | 3.301                       | Inactive | CHEMBL1270338         | 1.477                       | Active   | CHEMBL270248          | 2.179                       | Inactive |
| CHEMBL256434          | 1.813                       | Active   | CHEMBL1270334         | 1.114                       | Active   | CHEMBL411917          | 2.763                       | Inactive |
| CHEMBL248228          | 1.079                       | Active   | CHEMBL1270335         | 1.380                       | Active   | CHEMBL1270780         | 3.230                       | Inactive |
| CHEMBL2177486         | 4.997                       | Inactive | CHEMBL1270630         | 1.176                       | Active   | CHEMBL1269608         | 3.447                       | Inactive |
| CHEMBL401587          | 2.041                       | Inactive | CHEMBL1270631         | 1.301                       | Active   | CHEMBL584695          | 2.748                       | Inactive |
| CHEMBL566978          | 1.903                       | Active   | CHEMBL1270835         | 1.146                       | Active   | CHEMBL3604595         | 4.415                       | Inactive |
| CHEMBL584288          | 1.778                       | Active   | CHEMBL190010          | 1.778                       | Active   | CHEMBL3747445         | 2.806                       | Inactive |
| CHEMBL566548          | 2.279                       | Inactive | CHEMBL2403773         | 1.982                       | Active   | CHEMBL1099023         | 3.581                       | Inactive |
| CHEMBL568960          | 2.114                       | Inactive | CHEMBL2440151         | 3.668                       | Inactive | CHEMBL585952          | 3.185                       | Inactive |
| CHEMBL598259          | 1.477                       | Active   | CHEMBL2443380         | 3.630                       | Inactive | CHEMBL584694          | 2.447                       | Inactive |
| CHEMBL597073          | 2.477                       | Inactive | CHEMBL3394211         | -0.523                      | Active   | CHEMBL566200          | 1.602                       | Active   |
| CHEMBL598290          | 1.000                       | Active   | CHEMBL3394215         | 0.079                       | Active   | CHEMBL567688          | 1.301                       | Active   |
| CHEMBL1270336         | 1.903                       | Active   | CHEMBL3394218         | -0.699                      | Active   | CHEMBL1651460         | 1.301                       | Active   |
| CHEMBL585128          | 1.845                       | Active   | CHEMBL2403770         | 1.653                       | Active   | CHEMBL604590          | 1.778                       | Active   |
| CHEMBL1270239         | 1.903                       | Active   | CHEMBL2322830         | 4.801                       | Inactive | CHEMBL599965          | 2.996                       | Inactive |
| CHEMBL584917          | 1.954                       | Active   | CHEMBL191122          | 1.591                       | Active   | CHEMBL399840          | 1.982                       | Active   |
| CHEMBL2048061         | 1.643                       | Active   | CHEMBL3354701         | 0.845                       | Active   | CHEMBL566012          | 1.477                       | Active   |
| CHEMBL260722          | 3.494                       | Inactive | CHEMBL2403761         | 3.009                       | Inactive | CHEMBL571320          | 2.230                       | Inactive |
| CHEMBL577905          | 3.491                       | Inactive | CHEMBL2380819         | 2.881                       | Inactive | CHEMBL324109          | 2.663                       | Inactive |
| CHEMBL1271192         | 3.452                       | Inactive | CHEMBL2058867         | 3.876                       | Inactive | CHEMBL2181901         | 0.785                       | Active   |
| CHEMBL1269610         | 4.255                       | Inactive | CHEMBL2058875         | 3.829                       | Inactive | CHEMBL2181893         | 0.716                       | Active   |
| CHEMBL254626          | 3.613                       | Inactive | CHEMBL255372          | 2.272                       | Inactive | CHEMBL595302          | 3.455                       | Inactive |
| CHEMBL1923296         | 3.850                       | Inactive | CHEMBL1271451         | 3.152                       | Inactive | CHEMBL211499          | 3.954                       | Inactive |
| CHEMBL559870          | 3.728                       | Inactive | CHEMBL1821821         | 1.301                       | Active   | CHEMBL401008          | 1.380                       | Active   |
| CHEMBL288919          | 1.740                       | Active   | CHEMBL214963          | 3.041                       | Inactive | CHEMBL399113          | 1.826                       | Active   |
| CHEMBL3394041         | -0.301                      | Active   | CHEMBL2380438         | 4.398                       | Inactive | CHEMBL578410          | 3.398                       | Inactive |
| CHEMBL3394045         | 0.342                       | Active   | CHEMBL2380456         | 2.699                       | Inactive | CHEMBL210451          | 4.000                       | Inactive |
| CHEMBL3394050         | 0.431                       | Active   | CHEMBL381618          | 3.230                       | Inactive | CHEMBL270359          | 0.699                       | Active   |
| CHEMBL3422237         | 0.477                       | Active   | CHEMBL206665          | 3.279                       | Inactive | CHEMBL404680          | 1.949                       | Active   |
| CHEMBL584284          | 2.431                       | Inactive | CHEMBL2380822         | 2.609                       | Inactive | CHEMBL271710          | 2.057                       | Inactive |
| CHEMBL598257          | 2.000                       | Inactive | CHEMBL1098682         | 4.291                       | Inactive | CHEMBL402330          | 2.778                       | Inactive |
| CHEMBL590730          | 1.477                       | Active   | CHEMBL1099021         | 3.579                       | Inactive | CHEMBL1957474         | 1.370                       | Active   |
| CHEMBL129451          | 3.778                       | Inactive | CHEMBL1821811         | 1.869                       | Active   | CHEMBL1957470         | 1.610                       | Active   |
| CHEMBL1270432         | 1.301                       | Active   | CHEMBL210240          | 2.279                       | Inactive | CHEMBL2443369         | 0.477                       | Active   |
| CHEMBL1270526         | 1.079                       | Active   | CHEMBL1923295         | 3.140                       | Inactive | CHEMBL43962           | 3.146                       | Inactive |
| CHEMBL1760852         | 3.447                       | Inactive | CHEMBL370369          | 2.380                       | Inactive | CHEMBL2048040         | 1.041                       | Active   |
| CHEMBL1760864         | 3.633                       | Inactive | CHEMBL3414710         | 2.447                       | Inactive | CHEMBL2048043         | 1.633                       | Active   |
| CHEMBL1821819         | 1.041                       | Active   | CHEMBL3414704         | 4.944                       | Inactive | CHEMBL2048045         | 0.778                       | Active   |
| CHEMBL1821827         | 1.041                       | Active   | CHEMBL116826          | 4.531                       | Inactive | CHEMBL437961          | 3.717                       | Inactive |
| CHEMBL202015          | 3.740                       | Inactive | CHEMBL2380820         | 2.708                       | Inactive | CHEMBL378897          | 3.114                       | Inactive |
| CHEMBL381617          | 3.740                       | Inactive | CHEMBL295109          | 3.820                       | Inactive | CHEMBL1760853         | 3.792                       | Inactive |
| CHEMBL1270133         | 2.041                       | Inactive | CHEMBL585286          | 2.940                       | Inactive | CHEMBL403819          | 2.380                       | Inactive |



Table S2. (Cont.)

| Molecule<br>ChEMBL ID | logIC <sub>50</sub><br>(nM) | Label    | Molecule<br>ChEMBL ID | logIC <sub>50</sub><br>(nM) | Label    | Molecule<br>ChEMBL ID | logIC <sub>50</sub><br>(nM) | Label    |
|-----------------------|-----------------------------|----------|-----------------------|-----------------------------|----------|-----------------------|-----------------------------|----------|
| CHEMBL254625          | 2.491                       | Inactive | CHEMBL2152903         | 0.387                       | Active   | CHEMBL428074          | 2.643                       | Inactive |
| CHEMBL1762552         | 3.970                       | Inactive | CHEMBL1270027         | 1.954                       | Active   | CHEMBL200510          | 3.380                       | Inactive |
| CHEMBL1762556         | 4.050                       | Inactive | CHEMBL1270433         | 1.477                       | Active   | CHEMBL2059593         | 3.918                       | Inactive |
| CHEMBL1762679         | 4.058                       | Inactive | CHEMBL1270628         | 1.301                       | Active   | CHEMBL2169946         | 4.705                       | Inactive |
| CHEMBL1762685         | 4.379                       | Inactive | CHEMBL1271037         | 1.000                       | Active   | CHEMBL384496          | 1.505                       | Active   |
| CHEMBL181826          | 0.672                       | Active   | CHEMBL379820          | 1.833                       | Active   | CHEMBL583213          | 4.480                       | Inactive |
| CHEMBL2059330         | 3.876                       | Inactive | CHEMBL377581          | 2.041                       | Inactive | CHEMBL565251          | 4.307                       | Inactive |
| CHEMBL453211          | 0.954                       | Active   | CHEMBL1087736         | 4.197                       | Inactive | CHEMBL2407341         | 2.079                       | Inactive |
| CHEMBL504917          | 1.380                       | Active   | CHEMBL1270529         | 1.477                       | Active   | CHEMBL2180025         | 2.431                       | Inactive |
| CHEMBL1821818         | 1.431                       | Active   | CHEMBL1270834         | 1.447                       | Active   | CHEMBL2380814         | 3.037                       | Inactive |
| CHEMBL566977          | 3.724                       | Inactive | CHEMBL1957477         | 1.460                       | Active   | CHEMBL3747247         | 2.857                       | Inactive |
| CHEMBL567654          | 3.415                       | Inactive | CHEMBL1760863         | 4.820                       | Inactive | CHEMBL585215          | 3.093                       | Inactive |
| CHEMBL582045          | 1.531                       | Active   | CHEMBL3359748         | -0.222                      | Active   | CHEMBL378052          | 1.839                       | Active   |
| CHEMBL221454          | 1.176                       | Active   | CHEMBL212578          | 2.179                       | Inactive | CHEMBL3086250         | 3.875                       | Inactive |
| CHEMBL222209          | 1.799                       | Active   | CHEMBL585120          | 4.653                       | Inactive | CHEMBL2177904         | 2.093                       | Inactive |
| CHEMBL3354708         | 0.602                       | Active   | CHEMBL3327246         | 4.305                       | Inactive | CHEMBL2177336         | 2.954                       | Inactive |
| CHEMBL3354714         | 1.851                       | Active   | CHEMBL253165          | 2.685                       | Inactive | CHEMBL1270884         | 2.079                       | Inactive |
| CHEMBL3354690         | 0.491                       | Active   | CHEMBL257087          | 2.799                       | Inactive | CHEMBL1270082         | 4.699                       | Inactive |
| CHEMBL3354705         | 0.778                       | Active   | CHEMBL42453           | 1.699                       | Active   | CHEMBL2407342         | 1.000                       | Active   |
| CHEMBL211432          | 4.228                       | Inactive | CHEMBL605133          | 1.000                       | Active   | CHEMBL566632          | 3.143                       | Inactive |
| CHEMBL3414707         | 2.845                       | Inactive | CHEMBL605518          | 2.580                       | Inactive | CHEMBL1099361         | 3.364                       | Inactive |
| CHEMBL212203          | 2.143                       | Inactive | CHEMBL1269919         | 2.954                       | Inactive | CHEMBL201802          | 3.771                       | Inactive |
| CHEMBL209372          | 0.845                       | Active   | CHEMBL1270238         | 1.699                       | Active   | CHEMBL202057          | 2.653                       | Inactive |
| CHEMBL3394226         | -0.699                      | Active   | CHEMBL1270833         | 2.415                       | Inactive | CHEMBL3354710         | -0.301                      | Active   |
| CHEMBL324122          | 4.623                       | Inactive | CHEMBL1270935         | 1.602                       | Active   | CHEMBL456228          | 3.934                       | Inactive |
| CHEMBL364664          | 3.980                       | Inactive | CHEMBL1270436         | 1.477                       | Active   | CHEMBL1821829         | 2.591                       | Inactive |
| CHEMBL248056          | 1.591                       | Active   | CHEMBL1088138         | 3.907                       | Inactive | CHEMBL381826          | 0.681                       | Active   |
| CHEMBL1083394         | 4.067                       | Inactive | CHEMBL261655          | 4.153                       | Inactive | CHEMBL272320          | 2.886                       | Inactive |
| CHEMBL211097          | 3.580                       | Inactive | CHEMBL590829          | 2.000                       | Inactive | CHEMBL3422238         | 0.602                       | Active   |
| CHEMBL419949          | 3.748                       | Inactive | CHEMBL589891          | 2.591                       | Inactive | CHEMBL3414705         | 4.236                       | Inactive |
| CHEMBL183059          | 1.924                       | Active   | CHEMBL455667          | 4.593                       | Inactive | CHEMBL1270936         | 1.613                       | Active   |
| CHEMBL2047890         | 2.146                       | Inactive | CHEMBL455679          | 3.415                       | Inactive | CHEMBL3394056         | 0.380                       | Active   |
| CHEMBL2047898         | 1.740                       | Active   | CHEMBL260634          | 3.759                       | Inactive | CHEMBL3604698         | 4.857                       | Inactive |
| CHEMBL2047912         | 1.690                       | Active   | CHEMBL380257          | 2.799                       | Inactive | CHEMBL607527          | 2.978                       | Inactive |
| CHEMBL2048041         | 1.398                       | Active   | CHEMBL338988          | 3.204                       | Inactive | CHEMBL3236216         | 3.848                       | Inactive |
| CHEMBL257278          | 0.903                       | Active   | CHEMBL1760866         | 3.146                       | Inactive | CHEMBL1270883         | 3.248                       | Inactive |
| CHEMBL257907          | 2.519                       | Inactive | CHEMBL200617          | 2.415                       | Inactive | CHEMBL1269866         | 4.699                       | Inactive |
| CHEMBL114147          | 3.954                       | Inactive | CHEMBL2059601         | 3.693                       | Inactive | CHEMBL253800          | 2.049                       | Inactive |
| CHEMBL2048054         | 0.602                       | Active   | CHEMBL2058871         | 4.196                       | Inactive | CHEMBL410865          | 3.747                       | Inactive |
| CHEMBL1927636         | 2.216                       | Inactive | CHEMBL2048046         | 1.875                       | Active   | CHEMBL2346798         | 3.433                       | Inactive |
| CHEMBL1927635         | 1.658                       | Active   | CHEMBL2048049         | 1.633                       | Active   | CHEMBL3394213         | -0.398                      | Active   |
| CHEMBL260834          | 2.633                       | Inactive | CHEMBL206442          | 2.881                       | Inactive | CHEMBL3394214         | -0.097                      | Active   |
| CHEMBL2314782         | 4.544                       | Inactive | CHEMBL1271345         | 2.519                       | Inactive | CHEMBL3394216         | -0.523                      | Active   |
| CHEMBL211214          | 2.799                       | Inactive | CHEMBL248223          | 2.770                       | Inactive | CHEMBL205333          | 0.820                       | Active   |
| CHEMBL399979          | 0.845                       | Active   | CHEMBL2425604         | 2.326                       | Inactive | CHEMBL2177303         | 0.413                       | Active   |
| CHEMBL2407492         | 0.431                       | Active   | CHEMBL2425600         | 1.000                       | Active   | CHEMBL2177313         | 4.057                       | Inactive |
| CHEMBL255838          | 0.748                       | Active   | CHEMBL259547          | 4.091                       | Inactive | CHEMBL585289          | 1.602                       | Active   |
| CHEMBL1092476         | 1.699                       | Active   | CHEMBL253237          | 2.204                       | Inactive | CHEMBL164             | 3.447                       | Inactive |
| CHEMBL603664          | 2.176                       | Inactive | CHEMBL2181913         | 1.204                       | Active   | CHEMBL1090026         | 1.845                       | Active   |
| CHEMBL592533          | 3.033                       | Inactive | CHEMBL263260          | 2.602                       | Inactive | CHEMBL1080295         | 3.380                       | Inactive |

Table S2. (Cont.)

| Molecule<br>ChEMBL ID | logIC <sub>50</sub><br>(nM) | Label    | Molecule<br>ChEMBL ID | logIC <sub>50</sub><br>(nM) | Label    | Molecule<br>ChEMBL ID | logIC <sub>50</sub><br>(nM) | Label    |
|-----------------------|-----------------------------|----------|-----------------------|-----------------------------|----------|-----------------------|-----------------------------|----------|
| CHEMBL576258          | 1.301                       | Active   | CHEMBL566414          | 2.079                       | Inactive | CHEMBL566212          | 2.954                       | Inactive |
| CHEMBL3354718         | -0.523                      | Active   | CHEMBL206097          | 3.415                       | Inactive | CHEMBL1092787         | 1.301                       | Active   |
| CHEMBL2177315         | 3.455                       | Inactive | CHEMBL205637          | 3.053                       | Inactive | CHEMBL212102          | 3.049                       | Inactive |
| CHEMBL2177342         | 1.204                       | Active   | CHEMBL398925          | 3.565                       | Inactive | CHEMBL377548          | 2.708                       | Inactive |
| CHEMBL3640252         | 2.336                       | Inactive | CHEMBL206854          | 3.380                       | Inactive | CHEMBL255194          | 1.146                       | Active   |
| CHEMBL3640224         | 2.000                       | Inactive | CHEMBL256372          | 1.415                       | Active   | CHEMBL1821823         | 1.491                       | Active   |
| CHEMBL3640246         | 2.301                       | Inactive | CHEMBL258083          | 1.845                       | Active   | CHEMBL2172800         | 4.041                       | Inactive |
| CHEMBL3645150         | 2.000                       | Inactive | CHEMBL81671           | 1.914                       | Active   | CHEMBL2169942         | 4.149                       | Inactive |
| CHEMBL3645156         | 2.204                       | Inactive | CHEMBL3765195         | 3.000                       | Inactive | CHEMBL2181897         | 1.176                       | Active   |
| CHEMBL1092124         | 1.477                       | Active   | CHEMBL3765319         | 3.781                       | Inactive | CHEMBL2172799         | 4.365                       | Inactive |
| CHEMBL3414700         | 2.826                       | Inactive | CHEMBL3763728         | 1.602                       | Active   | CHEMBL2047887         | 1.740                       | Active   |
| CHEMBL78946           | 0.845                       | Active   | CHEMBL209052          | 3.000                       | Inactive | CHEMBL2047891         | 3.137                       | Inactive |
| CHEMBL3764532         | 2.602                       | Inactive | CHEMBL211256          | 1.954                       | Active   | CHEMBL2059613         | 3.823                       | Inactive |
| CHEMBL3764465         | 3.017                       | Inactive | CHEMBL426717          | 3.146                       | Inactive | CHEMBL2059624         | 3.982                       | Inactive |
| CHEMBL4073296         | 4.611                       | Inactive | CHEMBL1821828         | 1.987                       | Active   | CHEMBL2059626         | 4.029                       | Inactive |
| CHEMBL1270026         | 1.954                       | Active   | CHEMBL403727          | 0.477                       | Active   | CHEMBL2059100         | 4.004                       | Inactive |
| CHEMBL1271245         | 1.301                       | Active   | CHEMBL2347209         | 2.137                       | Inactive | CHEMBL2346804         | 2.771                       | Inactive |
| CHEMBL1270339         | 1.845                       | Active   | CHEMBL309438          | 2.813                       | Inactive | CHEMBL2346802         | 2.672                       | Inactive |
| CHEMBL2180037         | 1.898                       | Active   | CHEMBL2047914         | 2.826                       | Inactive | CHEMBL2322541         | 4.770                       | Inactive |
| CHEMBL2180029         | 3.176                       | Inactive | CHEMBL2048050         | 0.477                       | Active   | CHEMBL2322535         | 4.887                       | Inactive |
| CHEMBL3640242         | 1.000                       | Active   | CHEMBL2048051         | 0.301                       | Active   | CHEMBL2172804         | 4.314                       | Inactive |
| CHEMBL3640221         | 1.903                       | Active   | CHEMBL2048052         | 1.505                       | Active   | CHEMBL2172802         | 3.959                       | Inactive |
| CHEMBL3640276         | 1.342                       | Active   | CHEMBL2048053         | 0.301                       | Active   | CHEMBL2172794         | 4.155                       | Inactive |
| CHEMBL3400755         | 3.417                       | Inactive | CHEMBL2058869         | 3.902                       | Inactive | CHEMBL2169937         | 4.408                       | Inactive |
| CHEMBL3645147         | 1.903                       | Active   | CHEMBL1271091         | 2.839                       | Inactive | CHEMBL2181985         | 4.405                       | Inactive |
| CHEMBL3640228         | 2.041                       | Inactive | CHEMBL1270985         | 3.477                       | Inactive | CHEMBL1957471         | 1.310                       | Active   |
| CHEMBL3236224         | 3.791                       | Inactive | CHEMBL1269613         | 4.167                       | Inactive | CHEMBL1957475         | 1.140                       | Active   |
| CHEMBL602233          | 4.210                       | Inactive | CHEMBL566223          | 1.699                       | Active   | CHEMBL2181898         | 1.462                       | Active   |
| CHEMBL2425602         | 1.114                       | Active   | CHEMBL3236215         | 3.267                       | Inactive | CHEMBL2177490         | 4.049                       | Inactive |
| CHEMBL2425609         | 1.944                       | Active   | CHEMBL1762558         | 4.013                       | Inactive | CHEMBL2380444         | 3.799                       | Inactive |
| CHEMBL126142          | 3.653                       | Inactive | CHEMBL1762687         | 4.301                       | Inactive | CHEMBL213301          | 4.301                       | Inactive |
| CHEMBL3642610         | 3.748                       | Inactive | CHEMBL567633          | 2.898                       | Inactive | CHEMBL4085945         | 3.845                       | Inactive |
| CHEMBL3642607         | 2.173                       | Inactive | CHEMBL28626           | 4.336                       | Inactive | CHEMBL1762689         | 4.053                       | Inactive |
| CHEMBL200195          | 2.455                       | Inactive | CHEMBL2181884         | 1.521                       | Active   | CHEMBL1762686         | 4.084                       | Inactive |
| CHEMBL183546          | 0.591                       | Active   | CHEMBL2169924         | 4.777                       | Inactive | CHEMBL1762683         | 4.203                       | Inactive |
| CHEMBL3659646         | 4.079                       | Inactive | CHEMBL2169922         | 4.389                       | Inactive | CHEMBL1821824         | 1.699                       | Active   |
| CHEMBL3394223         | -0.155                      | Active   | CHEMBL2169939         | 4.233                       | Inactive | CHEMBL3659642         | 4.230                       | Inactive |
| CHEMBL1821815         | 0.398                       | Active   | CHEMBL2177483         | 3.041                       | Inactive | CHEMBL4078371         | 2.060                       | Inactive |
| CHEMBL1821822         | 1.944                       | Active   | CHEMBL2177481         | 3.806                       | Inactive | CHEMBL3653377         | 1.748                       | Active   |
| CHEMBL1762681         | 4.127                       | Inactive | CHEMBL2177473         | 3.380                       | Inactive | CHEMBL4129775         | 1.447                       | Active   |
| CHEMBL1099025         | 3.627                       | Inactive | CHEMBL507541          | 1.000                       | Active   | CHEMBL4177357         | 2.778                       | Inactive |
| CHEMBL32823           | 3.875                       | Inactive | CHEMBL3642605         | 3.708                       | Inactive | CHEMBL393501          | 4.462                       | Inactive |
| CHEMBL3645173         | 2.638                       | Inactive | CHEMBL1269920         | 1.301                       | Active   | CHEMBL235754          | 3.771                       | Inactive |
| CHEMBL1092475         | 1.602                       | Active   | CHEMBL3642623         | 2.146                       | Inactive | CHEMBL567485          | 2.431                       | Inactive |
| CHEMBL3645148         | 2.230                       | Inactive | CHEMBL2347188         | 1.114                       | Active   | CHEMBL453805          | 4.484                       | Inactive |
| CHEMBL3640281         | 1.954                       | Active   | CHEMBL566403          | 1.954                       | Active   | CHEMBL3640225         | 2.255                       | Inactive |
| CHEMBL3642634         | 3.929                       | Inactive | CHEMBL373255          | 3.987                       | Inactive | CHEMBL3640248         | 3.686                       | Inactive |
| CHEMBL367139          | 1.204                       | Active   | CHEMBL26125           | 2.176                       | Inactive | CHEMBL3640232         | 3.831                       | Inactive |
| CHEMBL3261066         | 2.547                       | Inactive | CHEMBL272700          | 2.173                       | Inactive | CHEMBL4127486         | 4.130                       | Inactive |
| CHEMBL4126351         | 1.204                       | Active   | CHEMBL2407494         | 1.881                       | Active   | CHEMBL3653399         | 1.301                       | Active   |

Table S2. (Cont.)

| Molecule<br>ChEMBL ID | logIC <sub>50</sub><br>(nM) | Label    | Molecule<br>ChEMBL ID | logIC <sub>50</sub><br>(nM) | Label    | Molecule<br>ChEMBL ID | logIC <sub>50</sub><br>(nM) | Label    |
|-----------------------|-----------------------------|----------|-----------------------|-----------------------------|----------|-----------------------|-----------------------------|----------|
| CHEMBL3086248         | 3.964                       | Inactive | CHEMBL201940          | 3.666                       | Inactive | CHEMBL2347195         | 1.431                       | Active   |
| CHEMBL4127807         | 1.580                       | Active   | CHEMBL3394055         | 0.398                       | Active   | CHEMBL2347191         | 1.623                       | Active   |
| CHEMBL205217          | 0.806                       | Active   | CHEMBL383772          | 2.255                       | Inactive | CHEMBL257645          | 0.602                       | Active   |
| CHEMBL439521          | 0.079                       | Active   | CHEMBL201961          | 2.991                       | Inactive | CHEMBL256904          | 2.281                       | Inactive |
| CHEMBL380521          | 3.716                       | Inactive | CHEMBL248245          | 2.604                       | Inactive | CHEMBL270153          | 2.114                       | Inactive |
| CHEMBL4169090         | 3.342                       | Inactive | CHEMBL252547          | 3.616                       | Inactive | CHEMBL3265331         | 2.176                       | Inactive |
| CHEMBL2347199         | 2.649                       | Inactive | CHEMBL1269921         | 1.000                       | Active   | CHEMBL3265334         | 1.778                       | Active   |
| CHEMBL3394210         | -0.155                      | Active   | CHEMBL377624          | 4.236                       | Inactive | CHEMBL3265336         | 4.204                       | Inactive |
| CHEMBL3394228         | -0.523                      | Active   | CHEMBL211899          | 1.114                       | Active   | CHEMBL201155          | 2.623                       | Inactive |
| CHEMBL2181980         | 4.086                       | Inactive | CHEMBL379513          | 0.903                       | Active   | CHEMBL192836          | 2.267                       | Inactive |
| CHEMBL3236228         | 4.062                       | Inactive | CHEMBL3597550         | 3.915                       | Inactive | CHEMBL190058          | 3.260                       | Inactive |
| CHEMBL211384          | 2.000                       | Inactive | CHEMBL401527          | 2.079                       | Inactive | CHEMBL2380808         | 3.978                       | Inactive |
| CHEMBL2048057         | 1.833                       | Active   | CHEMBL252961          | 3.037                       | Inactive | CHEMBL3763264         | 3.033                       | Inactive |
| CHEMBL2048063         | 0.845                       | Active   | CHEMBL201730          | 1.544                       | Active   | CHEMBL2181018         | 1.892                       | Active   |
| CHEMBL2059101         | 2.851                       | Inactive | CHEMBL566407          | 1.699                       | Active   | CHEMBL221597          | 1.301                       | Active   |
| CHEMBL3640235         | 1.778                       | Active   | CHEMBL439671          | 3.537                       | Inactive | CHEMBL3354694         | 1.230                       | Active   |
| CHEMBL3640239         | 1.301                       | Active   | CHEMBL187765          | 2.857                       | Inactive | CHEMBL3354700         | 0.954                       | Active   |
| CHEMBL3640241         | 2.708                       | Inactive | CHEMBL568114          | 2.176                       | Inactive | CHEMBL598258          | 1.903                       | Active   |
| CHEMBL3640261         | 2.328                       | Inactive | CHEMBL565378          | 2.799                       | Inactive | CHEMBL402276          | 1.079                       | Active   |
| CHEMBL2314779         | 3.613                       | Inactive | CHEMBL297453          | 2.879                       | Inactive | CHEMBL584109          | 2.447                       | Inactive |
| CHEMBL2314793         | 3.415                       | Inactive | CHEMBL1271453         | 1.000                       | Active   | CHEMBL2380817         | 2.756                       | Inactive |
| CHEMBL1269609         | 4.236                       | Inactive | CHEMBL1271346         | 1.301                       | Active   | CHEMBL566633          | 2.505                       | Inactive |
| CHEMBL1762555         | 4.207                       | Inactive | CHEMBL1270029         | 1.000                       | Active   | CHEMBL3260839         | -0.699                      | Active   |
| CHEMBL2177913         | 1.545                       | Active   | CHEMBL1270431         | 1.903                       | Active   | CHEMBL3261049         | 1.716                       | Active   |
| CHEMBL2177907         | 2.403                       | Inactive | CHEMBL1090027         | 1.477                       | Active   | CHEMBL3261078         | 0.000                       | Active   |
| CHEMBL1091463         | 1.778                       | Active   | CHEMBL1923158         | 2.650                       | Inactive | CHEMBL3261051         | 1.431                       | Active   |
| CHEMBL3642619         | 2.857                       | Inactive | CHEMBL583608          | 2.204                       | Inactive | CHEMBL6246            | 3.591                       | Inactive |
| CHEMBL3645159         | 2.279                       | Inactive | CHEMBL583887          | 3.155                       | Inactive | CHEMBL506814          | 2.613                       | Inactive |
| CHEMBL3640283         | 2.371                       | Inactive | CHEMBL565250          | 4.340                       | Inactive | CHEMBL1760732         | 2.881                       | Inactive |
| CHEMBL3640229         | 2.079                       | Inactive | CHEMBL582828          | 2.000                       | Inactive | CHEMBL1760734         | 3.041                       | Inactive |
| CHEMBL50              | 3.748                       | Inactive | CHEMBL565914          | 1.903                       | Active   | CHEMBL435747          | 5.491                       | Inactive |
| CHEMBL3422235         | 1.431                       | Active   | CHEMBL590492          | 1.845                       | Active   | CHEMBL2177307         | 2.699                       | Inactive |
| CHEMBL2380458         | 3.898                       | Inactive | CHEMBL2181882         | 1.461                       | Active   | CHEMBL2180030         | 1.079                       | Active   |
| CHEMBL2380454         | 3.898                       | Inactive | CHEMBL2181880         | 1.225                       | Active   | CHEMBL2180027         | 1.987                       | Active   |
| CHEMBL2380448         | 3.301                       | Inactive | CHEMBL208809          | 1.380                       | Active   | CHEMBL2322538         | 4.430                       | Inactive |
| CHEMBL2380809         | 2.851                       | Inactive | CHEMBL211937          | 3.771                       | Inactive | CHEMBL217374          | 1.954                       | Active   |
| CHEMBL2380806         | 3.462                       | Inactive | CHEMBL129482          | 4.447                       | Inactive | CHEMBL566198          | 2.519                       | Inactive |
| CHEMBL566638          | 1.845                       | Active   | CHEMBL429477          | 1.820                       | Active   | CHEMBL2407489         | 0.771                       | Active   |
| CHEMBL248922          | 2.064                       | Inactive | CHEMBL207083          | 3.000                       | Inactive | CHEMBL206651          | 3.230                       | Inactive |
| CHEMBL401338          | 3.700                       | Inactive | CHEMBL114169          | 3.114                       | Inactive | CHEMBL2314780         | 3.623                       | Inactive |
| CHEMBL252960          | 3.578                       | Inactive | CHEMBL271709          | 2.083                       | Inactive | CHEMBL2407490         | 0.398                       | Active   |
| CHEMBL594896          | 3.134                       | Inactive | CHEMBL407904          | 2.124                       | Inactive | CHEMBL2407339         | 0.672                       | Active   |
| CHEMBL584509          | 2.568                       | Inactive | CHEMBL443239          | 2.699                       | Inactive | CHEMBL202549          | 3.146                       | Inactive |
| CHEMBL239046          | 1.996                       | Active   | CHEMBL252756          | 3.810                       | Inactive | CHEMBL2407488         | 0.398                       | Active   |
| CHEMBL473159          | 4.562                       | Inactive | CHEMBL252755          | 3.749                       | Inactive | CHEMBL2407340         | 1.908                       | Active   |
| CHEMBL1957469         | 1.350                       | Active   | CHEMBL3422236         | 0.602                       | Active   | CHEMBL3597555         | 3.775                       | Inactive |
| CHEMBL589163          | 3.033                       | Inactive | CHEMBL364446          | 2.279                       | Inactive | CHEMBL2347210         | 1.415                       | Active   |
| CHEMBL471187          | 4.086                       | Inactive | CHEMBL2407345         | 1.556                       | Active   | CHEMBL3937141         | 4.914                       | Inactive |
| CHEMBL1952317         | 3.584                       | Inactive | CHEMBL2347190         | 1.690                       | Active   | CHEMBL2058872         | 3.868                       | Inactive |
| CHEMBL1952316         | 3.449                       | Inactive | CHEMBL2347196         | 1.398                       | Active   | CHEMBL565790          | 2.079                       | Inactive |

Table S2. (Cont.)

| Molecule<br>ChEMBL ID | logIC <sub>50</sub><br>(nM) | Label    | Molecule<br>ChEMBL ID | logIC <sub>50</sub><br>(nM) | Label    | Molecule<br>ChEMBL ID | logIC <sub>50</sub><br>(nM) | Label    |
|-----------------------|-----------------------------|----------|-----------------------|-----------------------------|----------|-----------------------|-----------------------------|----------|
| CHEMBL566968          | 2.279                       | Inactive | CHEMBL3394051         | -0.301                      | Active   | CHEMBL434943          | 1.204                       | Active   |
| CHEMBL1821810         | 3.716                       | Inactive | CHEMBL1760861         | 3.505                       | Inactive | CHEMBL568115          | 1.301                       | Active   |
| CHEMBL1821820         | -0.187                      | Active   | CHEMBL1760865         | 1.740                       | Active   | CHEMBL1271244         | 1.000                       | Active   |
| CHEMBL597062          | 2.146                       | Inactive | CHEMBL3354713         | 0.000                       | Active   | CHEMBL1269918         | 3.093                       | Inactive |
| CHEMBL1615184         | 2.176                       | Inactive | CHEMBL370043          | 1.762                       | Active   | CHEMBL130415          | 3.380                       | Inactive |
| CHEMBL405889          | 3.111                       | Inactive | CHEMBL3236220         | 3.856                       | Inactive | CHEMBL3354697         | 0.845                       | Active   |
| CHEMBL265953          | 3.998                       | Inactive | CHEMBL2177485         | 4.320                       | Inactive | CHEMBL3354706         | 0.477                       | Active   |
| CHEMBL405204          | 4.562                       | Inactive | CHEMBL2181915         | 0.799                       | Active   | CHEMBL3354711         | 0.845                       | Active   |
| CHEMBL212627          | 1.898                       | Active   | CHEMBL2181905         | 0.568                       | Active   | CHEMBL3260842         | 1.301                       | Active   |
| CHEMBL594656          | 3.895                       | Inactive | CHEMBL567259          | 2.716                       | Inactive | CHEMBL1086716         | 3.669                       | Inactive |
| CHEMBL2181982         | 3.797                       | Inactive | CHEMBL2181978         | 4.923                       | Inactive | CHEMBL2346801         | 2.748                       | Inactive |
| CHEMBL2177472         | 3.230                       | Inactive | CHEMBL2177470         | 2.000                       | Inactive | CHEMBL2177322         | 3.223                       | Inactive |
| CHEMBL2177320         | 3.072                       | Inactive | CHEMBL2425599         | 1.000                       | Active   | CHEMBL3645161         | 1.903                       | Active   |
| CHEMBL2177329         | 3.068                       | Inactive | CHEMBL1957472         | 2.030                       | Inactive | CHEMBL3640219         | 1.903                       | Active   |
| CHEMBL2177339         | 2.613                       | Inactive | CHEMBL1957482         | 1.770                       | Active   | CHEMBL2151151         | 0.778                       | Active   |
| CHEMBL2177343         | 0.903                       | Active   | CHEMBL3673194         | 1.886                       | Active   | CHEMBL2177915         | 0.812                       | Active   |
| CHEMBL2177305         | 0.396                       | Active   | CHEMBL4085715         | 4.314                       | Inactive | CHEMBL2180036         | 2.903                       | Inactive |
| CHEMBL1271140         | 1.778                       | Active   | CHEMBL4066885         | 3.770                       | Inactive | CHEMBL2180026         | 2.519                       | Inactive |
| CHEMBL1270134         | 1.778                       | Active   | CHEMBL4091480         | 4.866                       | Inactive | CHEMBL3645167         | 2.346                       | Inactive |
| CHEMBL1270337         | 1.602                       | Active   | CHEMBL253865          | 2.556                       | Inactive | CHEMBL3645174         | 1.732                       | Active   |
| CHEMBL1270832         | 1.602                       | Active   | CHEMBL566007          | 3.352                       | Inactive | CHEMBL3640260         | 1.322                       | Active   |
| CHEMBL1271036         | 1.477                       | Active   | CHEMBL4086961         | 0.021                       | Active   | CHEMBL3640285         | 1.602                       | Active   |
| CHEMBL2177341         | 4.017                       | Inactive | CHEMBL453642          | 3.924                       | Inactive | CHEMBL125743          | 3.398                       | Inactive |
| CHEMBL2177301         | 1.111                       | Active   | CHEMBL3414711         | 2.176                       | Inactive | CHEMBL3640247         | 2.204                       | Inactive |
| CHEMBL2177314         | 3.914                       | Inactive | CHEMBL3414703         | 4.322                       | Inactive | CHEMBL1821814         | 0.568                       | Active   |
| CHEMBL2425618         | 1.255                       | Active   | CHEMBL3086238         | 4.107                       | Inactive | CHEMBL386666          | 3.462                       | Inactive |
| CHEMBL2181998         | 5.057                       | Inactive | CHEMBL1762684         | 3.959                       | Inactive | CHEMBL191100          | 3.525                       | Inactive |
| CHEMBL2177482         | 3.785                       | Inactive | CHEMBL2177323         | 3.250                       | Inactive | CHEMBL295996          | 3.447                       | Inactive |
| CHEMBL2407495         | 2.041                       | Inactive | CHEMBL3287407         | 4.794                       | Inactive | CHEMBL2048062         | 1.556                       | Active   |
| CHEMBL3604596         | 4.748                       | Inactive | CHEMBL3287409         | 3.627                       | Inactive | CHEMBL3642632         | 2.960                       | Inactive |
| CHEMBL2347208         | 1.079                       | Active   | CHEMBL567053          | 3.903                       | Inactive | CHEMBL2314781         | 4.633                       | Inactive |
| CHEMBL2181908         | 0.568                       | Active   | CHEMBL56002           | 4.301                       | Inactive | CHEMBL3693258         | 1.908                       | Active   |
| CHEMBL2181906         | 0.279                       | Active   | CHEMBL593979          | 3.143                       | Inactive | CHEMBL1760730         | 4.740                       | Inactive |
| CHEMBL3642601         | 3.462                       | Inactive | CHEMBL2177920         | 1.190                       | Active   | CHEMBL2380439         | 5.000                       | Inactive |
| CHEMBL2346797         | 3.528                       | Inactive | CHEMBL2177919         | 1.784                       | Active   | CHEMBL2380445         | 3.000                       | Inactive |
| CHEMBL3642633         | 3.176                       | Inactive | CHEMBL2177910         | 3.140                       | Inactive | CHEMBL2380455         | 2.898                       | Inactive |
| CHEMBL3951035         | 3.170                       | Inactive | CHEMBL2177909         | 2.097                       | Inactive | CHEMBL2346789         | 3.733                       | Inactive |
| CHEMBL3645165         | 2.386                       | Inactive | CHEMBL568506          | 3.851                       | Inactive | CHEMBL2425611         | 0.903                       | Active   |
| CHEMBL2425608         | 0.301                       | Active   | CHEMBL584267          | 1.845                       | Active   | CHEMBL3640258         | 1.785                       | Active   |
| CHEMBL3640251         | 2.509                       | Inactive | CHEMBL567477          | 1.000                       | Active   | CHEMBL3640257         | 0.875                       | Active   |
| CHEMBL3640256         | 1.820                       | Active   | CHEMBL243148          | 3.716                       | Inactive | CHEMBL3640277         | 1.491                       | Active   |
| CHEMBL3640282         | 1.799                       | Active   | CHEMBL492828          | 4.442                       | Inactive | CHEMBL3659644         | 1.799                       | Active   |
| CHEMBL3640263         | 1.204                       | Active   | CHEMBL243796          | 3.519                       | Inactive | CHEMBL4173236         | 2.111                       | Inactive |
| CHEMBL3645158         | 2.255                       | Inactive | CHEMBL377149          | 2.193                       | Inactive | CHEMBL260621          | 2.176                       | Inactive |
| CHEMBL3640226         | 2.204                       | Inactive | CHEMBL1601822         | 2.422                       | Inactive | CHEMBL4203860         | 2.431                       | Inactive |
| CHEMBL4090604         | 3.176                       | Inactive | CHEMBL1312649         | 3.110                       | Inactive | CHEMBL4215837         | 0.968                       | Active   |
| CHEMBL3265332         | 2.556                       | Inactive | CHEMBL3642635         | 3.661                       | Inactive | CHEMBL2180014         | 1.785                       | Active   |
| CHEMBL211995          | 2.477                       | Inactive | CHEMBL3645170         | 2.204                       | Inactive | CHEMBL2180024         | 2.690                       | Inactive |
| CHEMBL3639440         | 2.176                       | Inactive | CHEMBL3645149         | 2.204                       | Inactive | CHEMBL3236217         | 3.342                       | Inactive |
| CHEMBL3394048         | -0.155                      | Active   | CHEMBL1821830         | 1.176                       | Active   | CHEMBL3604697         | 3.973                       | Inactive |

Table S2. (Cont.)

| Molecule<br>ChEMBL ID | logIC <sub>50</sub><br>(nM) | Label    | Molecule<br>ChEMBL ID | logIC <sub>50</sub><br>(nM) | Label    | Molecule<br>ChEMBL ID | logIC <sub>50</sub><br>(nM) | Label    |
|-----------------------|-----------------------------|----------|-----------------------|-----------------------------|----------|-----------------------|-----------------------------|----------|
| CHEMBL3659643         | 3.505                       | Inactive | CHEMBL2346799         | 3.859                       | Inactive | CHEMBL4206426         | 4.501                       | Inactive |
| CHEMBL1760855         | 2.996                       | Inactive | CHEMBL2425607         | 2.354                       | Inactive | CHEMBL1762560         | 3.814                       | Inactive |
| CHEMBL1589705         | 2.217                       | Inactive | CHEMBL2425610         | 1.519                       | Active   | CHEMBL1762554         | 4.099                       | Inactive |
| CHEMBL3645162         | 4.000                       | Inactive | CHEMBL445281          | 1.176                       | Active   | CHEMBL3086245         | 4.258                       | Inactive |
| CHEMBL3645169         | 2.703                       | Inactive | CHEMBL1760867         | 3.623                       | Inactive | CHEMBL4208507         | 3.591                       | Inactive |
| CHEMBL3645175         | 2.921                       | Inactive | CHEMBL2047900         | 2.301                       | Inactive | CHEMBL4206849         | 3.477                       | Inactive |
| CHEMBL2181909         | 1.041                       | Active   | CHEMBL2048060         | 0.778                       | Active   | CHEMBL4289749         | 1.491                       | Active   |
| CHEMBL2181904         | 1.041                       | Active   | CHEMBL501242          | 1.114                       | Active   | CHEMBL385374          | 0.602                       | Active   |
| CHEMBL2181903         | 0.978                       | Active   | CHEMBL2172795         | 4.009                       | Inactive | CHEMBL2047901         | 2.146                       | Inactive |
| CHEMBL2181902         | 0.279                       | Active   | CHEMBL1934197         | 4.045                       | Inactive | CHEMBL2047904         | 2.940                       | Inactive |
| CHEMBL2181899         | 1.672                       | Active   | CHEMBL2314788         | 4.037                       | Inactive | CHEMBL2048044         | 0.778                       | Active   |
| CHEMBL2181889         | 0.968                       | Active   | CHEMBL2403775         | 2.079                       | Inactive | CHEMBL3359756         | 0.519                       | Active   |
| CHEMBL2177334         | 3.507                       | Inactive | CHEMBL2403766         | 1.079                       | Active   | CHEMBL3359749         | -0.398                      | Active   |
| CHEMBL2322537         | 4.525                       | Inactive | CHEMBL3746566         | 2.322                       | Inactive | CHEMBL1270779         | 4.301                       | Inactive |
| CHEMBL2425601         | 1.079                       | Active   | CHEMBL3746637         | 1.699                       | Active   | CHEMBL1271399         | 4.301                       | Inactive |
| CHEMBL2425614         | 2.724                       | Inactive | CHEMBL939             | 4.301                       | Inactive | CHEMBL1271141         | 1.000                       | Active   |
| CHEMBL2380816         | 2.785                       | Inactive | CHEMBL2181022         | 1.734                       | Active   | CHEMBL1270241         | 2.301                       | Inactive |
| CHEMBL2380450         | 2.799                       | Inactive | CHEMBL3400758         | 3.649                       | Inactive | CHEMBL3394039         | -0.155                      | Active   |
| CHEMBL2177474         | 3.230                       | Inactive | CHEMBL3359747         | -0.155                      | Active   | CHEMBL3394047         | 0.602                       | Active   |
| CHEMBL2177471         | 4.041                       | Inactive | CHEMBL2331708         | 1.431                       | Active   | CHEMBL3354715         | -0.398                      | Active   |
| CHEMBL2180020         | 4.255                       | Inactive | CHEMBL2177319         | 3.723                       | Inactive | CHEMBL2177911         | 2.603                       | Inactive |
| CHEMBL2181916         | 0.964                       | Active   | CHEMBL3763944         | 2.987                       | Inactive | CHEMBL2177113         | 1.937                       | Active   |
| CHEMBL231160          | 2.033                       | Inactive | CHEMBL2047915         | 1.653                       | Active   | CHEMBL2177326         | 3.305                       | Inactive |
| CHEMBL261063          | 3.643                       | Inactive | CHEMBL2048037         | 1.556                       | Active   | CHEMBL2177316         | 3.083                       | Inactive |
| CHEMBL2407491         | 0.987                       | Active   | CHEMBL2048039         | 1.380                       | Active   | CHEMBL2181896         | 0.531                       | Active   |
| CHEMBL3640266         | 0.978                       | Active   | CHEMBL2047897         | 3.439                       | Inactive | CHEMBL2181891         | 1.806                       | Active   |
| CHEMBL2403769         | 1.342                       | Active   | CHEMBL2059104         | 3.945                       | Inactive | CHEMBL3936271         | 1.785                       | Active   |
| CHEMBL2347198         | 0.778                       | Active   | CHEMBL1760731         | 3.041                       | Inactive | CHEMBL2177489         | 4.364                       | Inactive |
| CHEMBL2347212         | 1.146                       | Active   | CHEMBL1760857         | 2.279                       | Inactive | CHEMBL2177488         | 3.114                       | Inactive |
| CHEMBL3640286         | 2.350                       | Inactive | CHEMBL1760858         | 2.568                       | Inactive | CHEMBL2177487         | 3.978                       | Inactive |
| CHEMBL3645152         | 2.176                       | Inactive | CHEMBL3394049         | -0.222                      | Active   | CHEMBL2180032         | 3.415                       | Inactive |
| CHEMBL4128807         | 4.281                       | Inactive | CHEMBL2347202         | 1.279                       | Active   | CHEMBL2180023         | 2.230                       | Inactive |
| CHEMBL2347215         | 1.362                       | Active   | CHEMBL2347194         | 1.826                       | Active   | CHEMBL2177311         | 3.314                       | Inactive |
| CHEMBL3659647         | 3.699                       | Inactive | CHEMBL2181828         | 1.685                       | Active   | CHEMBL2177318         | 2.981                       | Inactive |
| CHEMBL2380818         | 3.386                       | Inactive | CHEMBL2181892         | 0.613                       | Active   | CHEMBL1760856         | 2.176                       | Inactive |
| CHEMBL576628          | 3.540                       | Inactive | CHEMBL2177484         | 2.431                       | Inactive | CHEMBL3634342         | 0.857                       | Active   |
| CHEMBL3634122         | 1.643                       | Active   | CHEMBL2177478         | 3.176                       | Inactive | CHEMBL4174699         | 1.480                       | Active   |
| CHEMBL3765061         | 3.430                       | Inactive | CHEMBL2177475         | 3.362                       | Inactive | CHEMBL3586207         | 3.839                       | Inactive |
| CHEMBL3359757         | -0.046                      | Active   | CHEMBL2181887         | 0.903                       | Active   | CHEMBL2347193         | 1.415                       | Active   |
| CHEMBL3236218         | 3.207                       | Inactive | CHEMBL2180021         | 3.322                       | Inactive | CHEMBL2347366         | 1.756                       | Active   |
| CHEMBL3414706         | 3.708                       | Inactive | CHEMBL2403760         | 3.953                       | Inactive | CHEMBL2347192         | 1.230                       | Active   |
| CHEMBL2048038         | 1.748                       | Active   | CHEMBL2403764         | 3.602                       | Inactive | CHEMBL4288556         | 2.505                       | Inactive |
| CHEMBL2048042         | 2.079                       | Inactive | CHEMBL2403778         | 1.663                       | Active   | CHEMBL2347213         | 2.468                       | Inactive |
| CHEMBL2048047         | 0.301                       | Active   | CHEMBL2403777         | 1.362                       | Active   | CHEMBL2403771         | 2.881                       | Inactive |
| CHEMBL2048048         | 2.000                       | Inactive | CHEMBL2403776         | 1.146                       | Active   | CHEMBL2333941         | 2.378                       | Inactive |
| CHEMBL2047889         | 1.740                       | Active   | CHEMBL3265333         | 2.477                       | Inactive | CHEMBL3919597         | 1.519                       | Active   |
| CHEMBL2047899         | 2.079                       | Inactive | CHEMBL3265338         | 4.230                       | Inactive | CHEMBL2059605         | 4.134                       | Inactive |
| CHEMBL2047905         | 0.903                       | Active   | CHEMBL2180015         | 2.114                       | Inactive | CHEMBL3414702         | 4.556                       | Inactive |
| CHEMBL2180028         | 1.505                       | Active   | CHEMBL2180022         | 3.114                       | Inactive | CHEMBL2407344         | 1.230                       | Active   |
| CHEMBL2180019         | 4.114                       | Inactive | CHEMBL4211913         | 1.338                       | Active   | CHEMBL2425606         | 1.279                       | Active   |

Table S2. (Cont.)

| Molecule<br>ChEMBL ID | logIC <sub>50</sub><br>(nM) | Label    | Molecule<br>ChEMBL ID | logIC <sub>50</sub><br>(nM) | Label    | Molecule<br>ChEMBL ID | logIC <sub>50</sub><br>(nM) | Label    |
|-----------------------|-----------------------------|----------|-----------------------|-----------------------------|----------|-----------------------|-----------------------------|----------|
| CHEMBL2425613         | 0.845                       | Active   | CHEMBL2177477         | 3.491                       | Inactive | CHEMBL4204042         | 3.580                       | Inactive |
| CHEMBL3642641         | 3.358                       | Inactive | CHEMBL396338          | 1.869                       | Active   | CHEMBL2380810         | 3.267                       | Inactive |
| CHEMBL3640249         | 1.845                       | Active   | CHEMBL2047893         | 2.114                       | Inactive | CHEMBL3261072         | 1.310                       | Active   |
| CHEMBL3640291         | 1.623                       | Active   | CHEMBL2403763         | 4.033                       | Inactive | CHEMBL4127426         | 1.079                       | Active   |
| CHEMBL3640292         | 2.037                       | Inactive | CHEMBL2403779         | 2.568                       | Inactive | CHEMBL3642636         | 3.561                       | Inactive |
| CHEMBL3265335         | 3.000                       | Inactive | CHEMBL2172801         | 4.173                       | Inactive | CHEMBL3400753         | 2.940                       | Inactive |
| CHEMBL2347206         | 1.732                       | Active   | CHEMBL2172793         | 4.100                       | Inactive | CHEMBL3354707         | 0.602                       | Active   |
| CHEMBL2347364         | 1.505                       | Active   | CHEMBL2047907         | 1.973                       | Active   | CHEMBL4126751         | 4.417                       | Inactive |
| CHEMBL413999          | 3.294                       | Inactive | CHEMBL2047909         | 1.898                       | Active   | CHEMBL2059453         | 4.330                       | Inactive |
| CHEMBL2059592         | 4.041                       | Inactive | CHEMBL3414709         | 2.672                       | Inactive | CHEMBL3394042         | 0.851                       | Active   |
| CHEMBL2059597         | 4.558                       | Inactive | CHEMBL510508          | 3.328                       | Inactive | CHEMBL3394222         | 0.000                       | Active   |
| CHEMBL2058868         | 3.732                       | Inactive | CHEMBL3359754         | 0.748                       | Active   | CHEMBL3394225         | -0.523                      | Active   |
| CHEMBL3597548         | 4.127                       | Inactive | CHEMBL3359750         | 2.394                       | Inactive | CHEMBL2380813         | 2.653                       | Inactive |
| CHEMBL448015          | 1.342                       | Active   | CHEMBL3394040         | -0.046                      | Active   | CHEMBL3752684         | 4.255                       | Inactive |
| CHEMBL1955882         | 2.420                       | Inactive | CHEMBL3752926         | 2.633                       | Inactive | CHEMBL2181900         | 1.851                       | Active   |
| CHEMBL1957476         | 1.480                       | Active   | CHEMBL567341          | 4.800                       | Inactive | CHEMBL2181888         | 1.519                       | Active   |
| CHEMBL1760854         | 3.079                       | Inactive | CHEMBL1271343         | 2.230                       | Inactive | CHEMBL2177338         | 3.591                       | Inactive |
| CHEMBL2172797         | 4.732                       | Inactive | CHEMBL1271450         | 1.477                       | Active   | CHEMBL3642614         | 2.653                       | Inactive |
| CHEMBL2177302         | 0.917                       | Active   | CHEMBL1270528         | 2.732                       | Inactive | CHEMBL3359762         | 0.079                       | Active   |
| CHEMBL2425603         | 1.903                       | Active   | CHEMBL1270629         | 1.301                       | Active   | CHEMBL3359751         | 0.255                       | Active   |
| CHEMBL2425612         | 0.602                       | Active   | CHEMBL1270135         | 2.000                       | Inactive | CHEMBL2177469         | 3.079                       | Inactive |
| CHEMBL2425605         | 1.322                       | Active   | CHEMBL1270136         | 2.301                       | Inactive | CHEMBL2177480         | 3.230                       | Inactive |
| CHEMBL1614769         | 2.978                       | Inactive | CHEMBL1270435         | 1.000                       | Active   | CHEMBL2172803         | 4.386                       | Inactive |
| CHEMBL2177324         | 3.688                       | Inactive | CHEMBL1270530         | 1.845                       | Active   | CHEMBL2169947         | 4.727                       | Inactive |
| CHEMBL3394054         | 0.398                       | Active   | CHEMBL1760729         | 3.255                       | Inactive | CHEMBL4205912         | 1.623                       | Active   |
| CHEMBL2347189         | 1.602                       | Active   | CHEMBL1762688         | 4.047                       | Inactive | CHEMBL3586198         | 2.991                       | Inactive |
| CHEMBL2347186         | 1.886                       | Active   | CHEMBL3747444         | 2.826                       | Inactive | CHEMBL3086249         | 3.806                       | Inactive |
| CHEMBL2347200         | 2.179                       | Inactive | CHEMBL583899          | 2.672                       | Inactive | CHEMBL1952315         | 3.356                       | Inactive |
| CHEMBL2346796         | 2.875                       | Inactive | CHEMBL2365642         | 4.615                       | Inactive | CHEMBL2347363         | 1.940                       | Active   |
| CHEMBL2177308         | 2.127                       | Inactive | CHEMBL3394058         | 0.415                       | Active   | CHEMBL2181917         | 0.505                       | Active   |
| CHEMBL4128947         | 4.573                       | Inactive | CHEMBL2019055         | 1.519                       | Active   | CHEMBL4169060         | 1.455                       | Active   |
| CHEMBL2177107         | 0.699                       | Active   | CHEMBL3394212         | -0.398                      | Active   | CHEMBL496451          | 3.826                       | Inactive |
| CHEMBL2181894         | 0.839                       | Active   | CHEMBL3394227         | -0.699                      | Active   | CHEMBL590830          | 1.602                       | Active   |
| CHEMBL2177337         | 3.324                       | Inactive | CHEMBL3653409         | 1.964                       | Active   | CHEMBL4161795         | 1.029                       | Active   |
| CHEMBL2030997         | 0.699                       | Active   | CHEMBL4129637         | 2.316                       | Inactive | CHEMBL2058874         | 3.634                       | Inactive |
| CHEMBL2407487         | 0.785                       | Active   | CHEMBL4127062         | 3.663                       | Inactive | CHEMBL259083          | 4.324                       | Inactive |
| CHEMBL3326709         | 4.354                       | Inactive | CHEMBL3354689         | 0.301                       | Active   | CHEMBL260635          | 4.066                       | Inactive |
| CHEMBL2380449         | 3.301                       | Inactive | CHEMBL3354695         | 1.041                       | Active   | CHEMBL591070          | 2.934                       | Inactive |
| CHEMBL2181895         | 0.756                       | Active   | CHEMBL3354699         | 0.903                       | Active   | CHEMBL3640222         | 2.114                       | Inactive |
| CHEMBL2177468         | 3.204                       | Inactive | CHEMBL3354709         | -0.097                      | Active   | CHEMBL3640237         | 2.041                       | Inactive |
| CHEMBL2177476         | 3.602                       | Inactive | CHEMBL1222240         | 3.845                       | Inactive | CHEMBL412768          | 2.301                       | Inactive |
| CHEMBL2181827         | 1.417                       | Active   | CHEMBL2169923         | 4.845                       | Inactive | CHEMBL3747556         | 2.591                       | Inactive |
| CHEMBL2181883         | 1.884                       | Active   | CHEMBL2169943         | 4.667                       | Inactive | CHEMBL1957473         | 2.000                       | Inactive |
| CHEMBL208903          | 1.663                       | Active   | CHEMBL2181981         | 4.470                       | Inactive | CHEMBL4084653         | 3.621                       | Inactive |
| CHEMBL379067          | 2.000                       | Inactive | CHEMBL2181912         | 0.857                       | Active   | CHEMBL4061944         | 4.143                       | Inactive |
| CHEMBL378032          | 3.000                       | Inactive | CHEMBL2181830         | 0.732                       | Active   | CHEMBL4100140         | 4.707                       | Inactive |
| CHEMBL2322536         | 4.933                       | Inactive | CHEMBL3586196         | 3.029                       | Inactive | CHEMBL3326698         | 4.603                       | Inactive |
| CHEMBL2059606         | 4.405                       | Inactive | CHEMBL2059611         | 4.013                       | Inactive | CHEMBL399839          | 2.146                       | Inactive |
| CHEMBL2407338         | 1.964                       | Active   | CHEMBL3359752         | 0.176                       | Active   | CHEMBL400043          | 1.699                       | Active   |
| CHEMBL2047894         | 3.210                       | Inactive | CHEMBL3897492         | 2.934                       | Inactive | CHEMBL3586197         | 2.362                       | Inactive |

Table S2. (Cont.)

| Molecule<br>ChEMBL ID | logIC <sub>50</sub><br>(nM) | Label    | Molecule<br>ChEMBL ID | logIC <sub>50</sub><br>(nM) | Label    | Molecule<br>ChEMBL ID | logIC <sub>50</sub><br>(nM) | Label    |
|-----------------------|-----------------------------|----------|-----------------------|-----------------------------|----------|-----------------------|-----------------------------|----------|
| CHEMBL2177906         | 2.382                       | Inactive | CHEMBL2181015         | 1.903                       | Active   | CHEMBL3359759         | 0.362                       | Active   |
| CHEMBL2047910         | 2.176                       | Inactive | CHEMBL2443370         | 3.831                       | Inactive | CHEMBL3883958         | 4.223                       | Inactive |
| CHEMBL2047913         | 1.892                       | Active   | CHEMBL2443373         | 3.624                       | Inactive | CHEMBL3400767         | 2.681                       | Inactive |
| CHEMBL1271344         | 1.477                       | Active   | CHEMBL2322539         | 4.806                       | Inactive | CHEMBL3640245         | 1.602                       | Active   |
| CHEMBL1270727         | 1.477                       | Active   | CHEMBL3645157         | 2.041                       | Inactive | CHEMBL4212046         | 2.041                       | Inactive |
| CHEMBL1270730         | 1.699                       | Active   | CHEMBL2380812         | 3.100                       | Inactive | CHEMBL4217023         | 2.996                       | Inactive |
| CHEMBL3394057         | -0.046                      | Active   | CHEMBL2380807         | 2.491                       | Inactive | CHEMBL4204215         | 3.283                       | Inactive |
| CHEMBL3394221         | -0.523                      | Active   | CHEMBL131770          | 3.405                       | Inactive | CHEMBL4096411         | 4.481                       | Inactive |
| CHEMBL3394052         | 0.146                       | Active   | CHEMBL3747119         | 2.778                       | Inactive | CHEMBL4175845         | 1.265                       | Active   |
| CHEMBL252189          | 2.778                       | Inactive | CHEMBL2407343         | 2.079                       | Inactive | CHEMBL3394224         | -0.523                      | Active   |
| CHEMBL2347197         | 1.114                       | Active   | CHEMBL498456          | 3.679                       | Inactive | CHEMBL3394053         | 0.580                       | Active   |
| CHEMBL2346800         | 2.230                       | Inactive | CHEMBL3354703         | 2.509                       | Inactive | CHEMBL4098403         | 1.839                       | Active   |
| CHEMBL3086246         | 3.672                       | Inactive | CHEMBL3354704         | 0.602                       | Active   | CHEMBL4086633         | 3.117                       | Inactive |
| CHEMBL3086242         | 4.170                       | Inactive | CHEMBL129795          | 4.712                       | Inactive | CHEMBL4159379         | 3.230                       | Inactive |
| CHEMBL3301601         | 0.342                       | Active   | CHEMBL3640238         | 2.230                       | Inactive | CHEMBL4204163         | 1.860                       | Active   |
| CHEMBL3645155         | 1.954                       | Active   | CHEMBL3640244         | 1.699                       | Active   | CHEMBL3604598         | 4.531                       | Inactive |
| CHEMBL3642613         | 2.912                       | Inactive | CHEMBL3400765         | 3.004                       | Inactive | CHEMBL4207711         | 3.124                       | Inactive |
| CHEMBL3659639         | 2.954                       | Inactive | CHEMBL3642617         | 3.447                       | Inactive | CHEMBL4212215         | 3.813                       | Inactive |
| CHEMBL2314792         | 3.380                       | Inactive | CHEMBL3642611         | 2.193                       | Inactive | CHEMBL3909581         | 1.519                       | Active   |
| CHEMBL2314789         | 4.097                       | Inactive | CHEMBL3640264         | 1.505                       | Active   | CHEMBL2403762         | 2.740                       | Inactive |
| CHEMBL1760860         | 1.778                       | Active   | CHEMBL3640275         | 1.968                       | Active   | CHEMBL2380443         | 4.000                       | Inactive |
| CHEMBL2047906         | 1.716                       | Active   | CHEMBL3642630         | 3.296                       | Inactive | CHEMBL3422242         | 0.778                       | Active   |
| CHEMBL2047895         | 3.161                       | Inactive | CHEMBL3645163         | 2.217                       | Inactive | CHEMBL3640271         | 2.543                       | Inactive |
| CHEMBL2047903         | 1.785                       | Active   | CHEMBL1526260         | 3.176                       | Inactive | CHEMBL1914472         | 0.301                       | Active   |
| CHEMBL2047911         | 2.114                       | Inactive | CHEMBL3640223         | 2.079                       | Inactive | CHEMBL4208381         | 3.279                       | Inactive |
| CHEMBL3642642         | 2.114                       | Inactive | CHEMBL2380461         | 4.204                       | Inactive | CHEMBL2047896         | 2.342                       | Inactive |
| CHEMBL3659640         | 4.041                       | Inactive | CHEMBL3422243         | 0.477                       | Active   | CHEMBL2047902         | 2.748                       | Inactive |
| CHEMBL3640287         | 1.826                       | Active   | CHEMBL3422244         | 1.000                       | Active   | CHEMBL3642616         | 3.903                       | Inactive |
| CHEMBL4127289         | 4.386                       | Inactive | CHEMBL3642604         | 2.444                       | Inactive | CHEMBL3642615         | 3.653                       | Inactive |
| CHEMBL412768          | 2.301                       | Inactive | CHEMBL3642609         | 3.898                       | Inactive | CHEMBL3950821         | 3.771                       | Inactive |
| CHEMBL3890737         | 2.708                       | Inactive | CHEMBL3642612         | 3.826                       | Inactive | CHEMBL3907072         | 3.398                       | Inactive |
| CHEMBL257091          | 2.785                       | Inactive | CHEMBL4064412         | 4.083                       | Inactive | CHEMBL3642600         | 1.595                       | Active   |
| CHEMBL4129873         | 4.176                       | Inactive | CHEMBL3634123         | 1.643                       | Active   | CHEMBL3745864         | 2.756                       | Inactive |
| CHEMBL4128586         | 3.886                       | Inactive | CHEMBL2380441         | 4.505                       | Inactive | CHEMBL4128406         | 1.398                       | Active   |
| CHEMBL222274          | 3.748                       | Inactive | CHEMBL3746636         | 2.556                       | Inactive | CHEMBL4126197         | 1.724                       | Active   |
| CHEMBL3326704         | 4.236                       | Inactive | CHEMBL3747274         | 3.130                       | Inactive | CHEMBL2169938         | 4.595                       | Inactive |
| CHEMBL4294221         | -0.208                      | Active   | CHEMBL1483796         | 3.820                       | Inactive | CHEMBL3980733         | 1.568                       | Active   |
| CHEMBL3394219         | -0.398                      | Active   | CHEMBL3746896         | 2.681                       | Inactive | CHEMBL3236225         | 3.276                       | Inactive |
| CHEMBL3327247         | 4.631                       | Inactive | CHEMBL4208775         | 3.462                       | Inactive | CHEMBL2346803         | 4.867                       | Inactive |
| CHEMBL2380815         | 2.799                       | Inactive | CHEMBL4203347         | 3.713                       | Inactive | CHEMBL2177918         | 1.620                       | Active   |
| CHEMBL2347367         | 2.265                       | Inactive | CHEMBL1610040         | 2.968                       | Inactive | CHEMBL2177309         | 2.199                       | Inactive |
| CHEMBL4066788         | 3.835                       | Inactive | CHEMBL3642631         | 3.510                       | Inactive | CHEMBL2059596         | 3.729                       | Inactive |
| CHEMBL4127412         | 4.127                       | Inactive | CHEMBL3642640         | 2.342                       | Inactive | CHEMBL3354691         | 0.301                       | Active   |
| CHEMBL4127986         | 4.587                       | Inactive | CHEMBL3645168         | 1.568                       | Active   | CHEMBL3354712         | 0.602                       | Active   |
| CHEMBL201049          | 3.114                       | Inactive | CHEMBL3645176         | 3.361                       | Inactive | CHEMBL3642602         | 3.845                       | Inactive |
| CHEMBL382233          | 3.176                       | Inactive | CHEMBL3645177         | 2.241                       | Inactive | CHEMBL3642622         | 3.602                       | Inactive |
| CHEMBL3394043         | 1.053                       | Active   | CHEMBL4088234         | 1.892                       | Active   | CHEMBL3642599         | 3.886                       | Inactive |
| CHEMBL370801          | 2.863                       | Inactive | CHEMBL4080380         | 2.886                       | Inactive | CHEMBL2346790         | 3.453                       | Inactive |
| CHEMBL3394217         | -0.398                      | Active   | CHEMBL4104527         | 4.305                       | Inactive | CHEMBL2347204         | 1.447                       | Active   |
| CHEMBL3394220         | -0.523                      | Active   | CHEMBL4092406         | 3.914                       | Inactive | CHEMBL2347205         | 2.638                       | Inactive |

Table S2. (Cont.)

| Molecule<br>ChEMBL ID | logIC <sub>50</sub><br>(nM) | Label    | Molecule<br>ChEMBL ID | logIC <sub>50</sub><br>(nM) | Label    | Molecule<br>ChEMBL ID | logIC <sub>50</sub><br>(nM) | Label    |
|-----------------------|-----------------------------|----------|-----------------------|-----------------------------|----------|-----------------------|-----------------------------|----------|
| CHEMBL2347201         | 1.556                       | Active   | CHEMBL3653445         | 1.146                       | Active   | CHEMBL4165225         | 1.346                       | Active   |
| CHEMBL2347365         | 1.708                       | Active   | CHEMBL3653413         | 3.049                       | Inactive | CHEMBL3672916         | -0.046                      | Active   |
| CHEMBL3659645         | 3.519                       | Inactive | CHEMBL3586204         | 2.491                       | Inactive | CHEMBL4211220         | 3.398                       | Inactive |
| CHEMBL3640273         | 1.789                       | Active   | CHEMBL3763318         | 2.146                       | Inactive | CHEMBL4204582         | 3.431                       | Inactive |
| CHEMBL3640278         | 1.415                       | Active   | CHEMBL3640289         | 1.322                       | Active   | CHEMBL4211801         | 3.230                       | Inactive |
| CHEMBL3640265         | 2.068                       | Inactive | CHEMBL3640268         | 1.255                       | Active   | CHEMBL4202435         | 3.556                       | Inactive |
| CHEMBL3640262         | 1.217                       | Active   | CHEMBL3645160         | 1.954                       | Active   | CHEMBL3818084         | 2.522                       | Inactive |
| CHEMBL4127550         | 4.471                       | Inactive | CHEMBL3645171         | 1.431                       | Active   | CHEMBL4206331         | 3.580                       | Inactive |
| CHEMBL4130015         | 4.441                       | Inactive | CHEMBL3645172         | 1.505                       | Active   | CHEMBL4204309         | 3.447                       | Inactive |
| CHEMBL4209354         | 3.782                       | Inactive | CHEMBL3265330         | 2.041                       | Inactive | CHEMBL1492021         | 3.477                       | Inactive |
| CHEMBL2059329         | 4.021                       | Inactive | CHEMBL2396987         | 4.342                       | Inactive | CHEMBL3884069         | 4.317                       | Inactive |
| CHEMBL4287410         | 0.875                       | Active   | CHEMBL3261046         | 1.301                       | Active   | CHEMBL4083698         | 4.190                       | Inactive |
| CHEMBL2059594         | 4.182                       | Inactive | CHEMBL3261050         | 2.711                       | Inactive | CHEMBL3653410         | 1.580                       | Active   |
| CHEMBL3910646         | 2.204                       | Inactive | CHEMBL4277255         | 1.857                       | Active   | CHEMBL4218591         | 3.613                       | Inactive |
| CHEMBL2407496         | 1.653                       | Active   | CHEMBL4279064         | 0.556                       | Active   | CHEMBL4218068         | 3.431                       | Inactive |
| CHEMBL4279496         | 0.740                       | Active   | CHEMBL3261067         | 0.699                       | Active   | CHEMBL4207174         | 3.415                       | Inactive |
| CHEMBL3422245         | 1.176                       | Active   | CHEMBL3422241         | 0.778                       | Active   | CHEMBL168938          | 2.843                       | Inactive |
| CHEMBL3642620         | 3.756                       | Inactive | CHEMBL3261079         | 0.924                       | Active   | CHEMBL3640230         | 3.966                       | Inactive |
| CHEMBL3642618         | 3.409                       | Inactive | CHEMBL2347211         | 0.826                       | Active   | CHEMBL4217620         | -0.222                      | Active   |
| CHEMBL3645151         | 2.146                       | Inactive | CHEMBL3917530         | 1.780                       | Active   | CHEMBL4128770         | 1.301                       | Active   |
| CHEMBL4159574         | 1.610                       | Active   | CHEMBL4061602         | 3.294                       | Inactive | CHEMBL4202984         | 3.380                       | Inactive |
| CHEMBL3640284         | 1.491                       | Active   | CHEMBL4102593         | 3.322                       | Inactive | CHEMBL3604597         | 4.806                       | Inactive |
| CHEMBL4094377         | 2.690                       | Inactive | CHEMBL4217236         | 3.505                       | Inactive | CHEMBL4175758         | 3.370                       | Inactive |
| CHEMBL4126598         | 4.243                       | Inactive | CHEMBL3653341         | 1.845                       | Active   | CHEMBL4291981         | 1.322                       | Active   |
| CHEMBL3640233         | 3.832                       | Inactive | CHEMBL4284110         | -0.509                      | Active   | CHEMBL4170106         | 2.180                       | Active   |
| CHEMBL3640236         | 1.000                       | Active   | CHEMBL4282964         | 0.255                       | Active   | CHEMBL4162197         | 1.057                       | Active   |
| CHEMBL4174503         | 3.756                       | Inactive | CHEMBL3659641         | 4.431                       | Inactive | CHEMBL4167487         | 1.389                       | Active   |
| CHEMBL3891534         | 1.301                       | Active   | CHEMBL3967984         | 1.464                       | Active   | CHEMBL4171250         | 3.480                       | Inactive |
| CHEMBL3986498         | 2.362                       | Inactive | CHEMBL4062641         | 3.255                       | Inactive | CHEMBL4160644         | 2.660                       | Inactive |
| CHEMBL3928503         | 3.301                       | Inactive | CHEMBL3640255         | 1.544                       | Active   | CHEMBL4167898         | 3.270                       | Inactive |
| CHEMBL3645164         | 2.212                       | Inactive | CHEMBL3640254         | 2.822                       | Inactive | CHEMBL4211219         | 3.521                       | Inactive |
| CHEMBL3645166         | 1.690                       | Active   | CHEMBL3941301         | 2.729                       | Inactive | CHEMBL4216181         | 3.767                       | Inactive |
| CHEMBL3972449         | 1.358                       | Active   | CHEMBL3952064         | 1.567                       | Active   | CHEMBL4204085         | 3.851                       | Inactive |
| CHEMBL3640290         | 1.146                       | Active   | CHEMBL4276834         | -0.337                      | Active   | CHEMBL4280656         | 1.114                       | Active   |
| CHEMBL3640267         | 1.699                       | Active   | CHEMBL3693257         | 2.568                       | Inactive | CHEMBL4285211         | -0.036                      | Active   |
| CHEMBL3634125         | 1.079                       | Active   | CHEMBL4205504         | 3.204                       | Inactive | CHEMBL4290822         | -0.237                      | Active   |
| CHEMBL4165629         | 1.470                       | Active   | CHEMBL3658614         | 2.380                       | Inactive | CHEMBL4286331         | -0.244                      | Active   |
| CHEMBL3642603         | 3.699                       | Inactive | CHEMBL4176954         | 3.330                       | Inactive | CHEMBL4128727         | 4.176                       | Inactive |
| CHEMBL3642621         | 3.908                       | Inactive | CHEMBL3947194         | 2.029                       | Inactive | CHEMBL3653512         | 1.431                       | Active   |
| CHEMBL3900541         | 2.778                       | Inactive | CHEMBL4128145         | 3.032                       | Inactive | CHEMBL3745974         | 2.653                       | Inactive |
| CHEMBL3597554         | 3.396                       | Inactive | CHEMBL3597549         | 4.067                       | Inactive | CHEMBL4126839         | 1.940                       | Active   |
| CHEMBL4130130         | 2.846                       | Inactive | CHEMBL4127572         | 1.380                       | Active   | CHEMBL3983988         | 2.250                       | Inactive |
| CHEMBL4128824         | 1.881                       | Active   | CHEMBL502             | 2.228                       | Inactive | CHEMBL3979124         | 2.360                       | Inactive |
| CHEMBL3746261         | 1.845                       | Active   | CHEMBL4214603         | 3.962                       | Inactive | CHEMBL3922902         | 2.415                       | Inactive |
| CHEMBL3745922         | 2.820                       | Inactive | CHEMBL3642638         | 2.360                       | Inactive | CHEMBL4214785         | 4.378                       | Inactive |
| CHEMBL3746752         | 2.279                       | Inactive | CHEMBL4094980         | 3.415                       | Inactive | CHEMBL4062728         | 2.525                       | Inactive |
| CHEMBL3754357         | 3.808                       | Inactive | CHEMBL3642639         | 2.243                       | Inactive | CHEMBL4064148         | 4.188                       | Inactive |
| CHEMBL4204985         | 3.756                       | Inactive | CHEMBL4127672         | 3.623                       | Inactive | CHEMBL4084170         | 4.738                       | Inactive |
| CHEMBL4077211         | 2.979                       | Inactive | CHEMBL4128447         | 3.505                       | Inactive |                       |                             |          |
| CHEMBL4064708         | 4.545                       | Inactive | CHEMBL4287483         | -0.367                      | Active   |                       |                             |          |



**Table S3.** Molecular descriptors of CART and CHAID models for predicting AChE inhibitory activity

| Model             | Code          | Description                                                                           | Block                       |
|-------------------|---------------|---------------------------------------------------------------------------------------|-----------------------------|
| <b>AChE-CART</b>  | L_Dz(p)       | Balaban-like index from Barysz matrix weighted by polarizability                      | 2D matrix-based descriptors |
|                   | AVS_B(m)      | average vertex sum from Burden matrix weighted by mass                                | 2D matrix-based descriptors |
|                   | ATSC2e        | Centred Broto-Moreau autocorrelation of lag 2 weighted by Sanderson electronegativity | 2D autocorrelations         |
|                   | C-011         | CR3X                                                                                  | Atom-centred fragments      |
|                   | H-051         | H attached to alpha C                                                                 | Atom-centred fragments      |
| <b>AChE-CHAID</b> | nHM           | Number of heavy atoms                                                                 | Constitutional indices      |
|                   | N%            | Percentage of N atoms                                                                 | Constitutional indices      |
|                   | NNRS          | Normalized number of ring systems                                                     | Ring descriptors            |
|                   | Yindex        | Balaban Y index                                                                       | Information indices         |
|                   | Eta_betaP_A   | Eta pi and lone pair average VEM count                                                | ETA indices                 |
|                   | SpMaxA_EA(ed) | Normalized leading eigenvalue from edge adjacency mat. weighted by edge degree        | Edge adjacency indices      |
|                   | SM15_EA(dm)   | Spectral moment of order 15 from edge adjacency mat. weighted by dipole moment        | Edge adjacency indices      |
|                   | Eig02_AEA(ed) | Eigenvalue n. 2 from augmented edge adjacency mat. weighted by edge degree            | Edge adjacency indices      |
|                   | C-006         | CH2RX                                                                                 | Atom-centred fragments      |
|                   | H-051         | H attached to alpha C                                                                 | Atom-centred fragments      |
|                   | O-058         | Phenol / enol / carboxyl OH                                                           | Atom-centred fragments      |
|                   | T(N..N)       | Sum of topological distances between N...N                                            | 2D Atom Pairs               |
|                   | F04[O-O]      | Frequency of O - O at topological distance 4                                          | 2D Atom Pairs               |
|                   | F09[C-N]      | Frequency of C - N at topological distance 9                                          | 2D Atom Pairs               |

**Table S4.** Molecular descriptors of CART and CHAID models for predicting BACE1 inhibitory activity

| Model              | Code         | Description                                                                        | Block                   |
|--------------------|--------------|------------------------------------------------------------------------------------|-------------------------|
| <b>BACE1-CART</b>  | GGI7         | Topological charge index of order 7                                                | 2D autocorrelations     |
|                    | GGI9         | Topological charge index of order 9                                                | 2D autocorrelations     |
|                    | P_VSA_e_3    | P_VSA-like on Sanderson electronegativity, bin 3                                   | P_VSA-like descriptors  |
|                    | SM06_EA(ri)  | Spectral moment of order 6 from edge adjacency mat. weighted by resonance integral | Edge adjacency indices  |
|                    | C-029        | R--CX--X                                                                           | Atom-centred fragments  |
|                    | F07[O-F]     | Frequency of O - F at topological distance 7                                       | 2D autocorrelations     |
| <b>BACE1-CHAID</b> | nCIC         | number of rings (cyclomatic number)                                                | Ring descriptors        |
|                    | nR10         | number of 10-membered rings                                                        | Ring descriptors        |
|                    | IC1          | Information Content index (neighborhood symmetry of 1-order)                       | Information indices     |
|                    | SM06_EA(ri)  | spectral moment of order 6 from edge adjacency mat. weighted by resonance integral | Edge adjacency indices  |
|                    | Eig04_EA(dm) | eigenvalue n. 4 from edge adjacency mat. weighted by dipole moment                 | Edge adjacency indices  |
|                    | nHDon        | number of donor atoms for H-bonds (N and O)                                        | Functional group counts |
|                    | C-029        | R--CX--X                                                                           | Atom-centred fragments  |

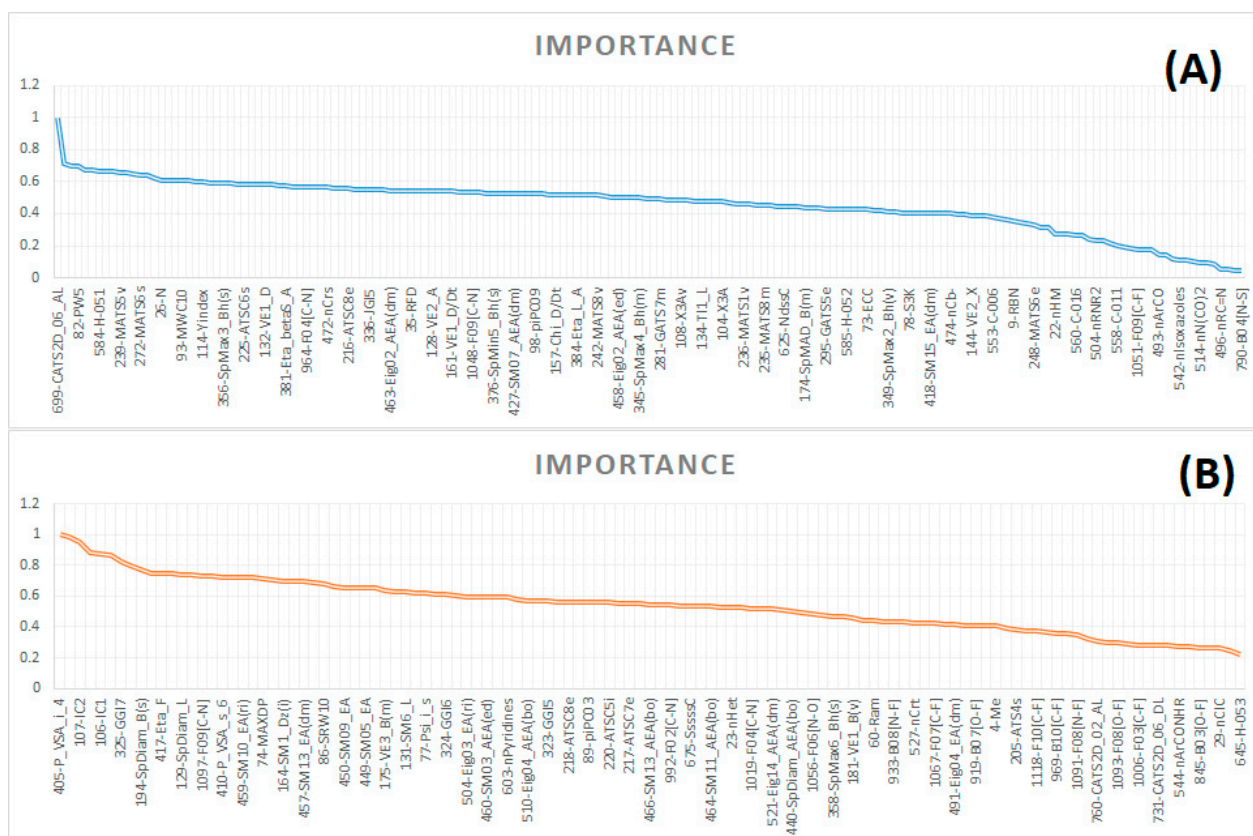

**Figure S1.** Variable importance according to RF models for predicting (A) AChE and (B) BACE1 inhibitory activity

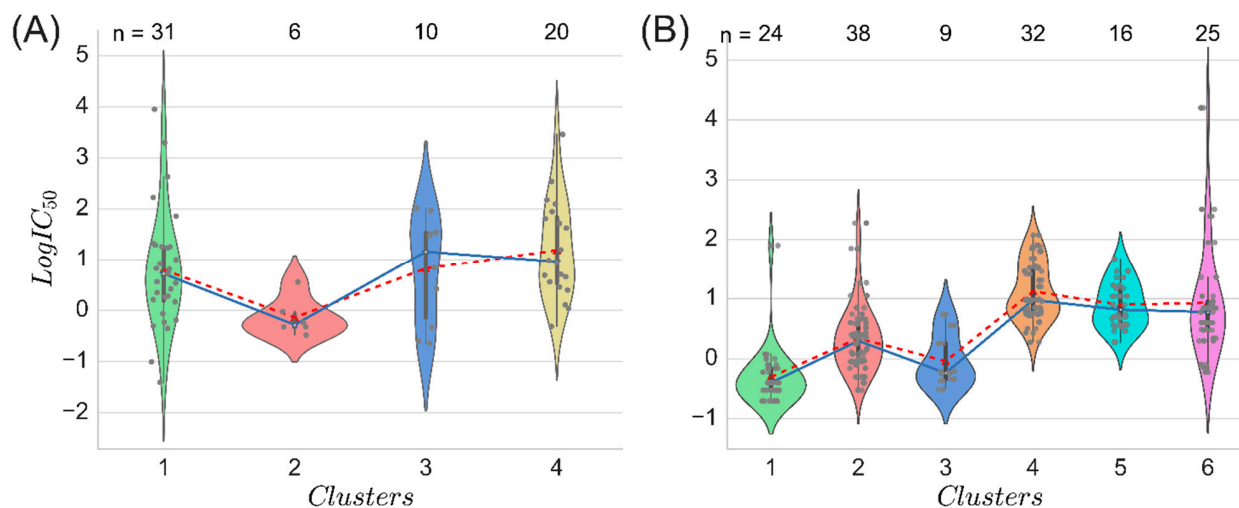

**Figure S2.** Distribution of experimental  $IC_{50}$  values of (A) 67 AChE inhibitors, (B) 144 BACE1 inhibitors among clusters.

**Table S5.** Structures and bioactivities of 67 AChE inhibitors

| Molecule<br>ChEMBL ID | SMILES                                                                                        | IC <sub>50</sub><br>(nM) |
|-----------------------|-----------------------------------------------------------------------------------------------|--------------------------|
| CHEMBL372202          | <chem>COc1ccc2[nH]cc(CCN(C=O)CCCCCNc3c4c(nc5cc(Cl)cc(Cl)c35)CCCC4)c2c1</chem>                 | 0.04                     |
| CHEMBL194823          | <chem>O=C(CCCCC1CCSS1)NCCCNc1c2c(nc3cc(Cl)ccc13)CCCC2</chem>                                  | 0.253                    |
| CHEMBL219264          | <chem>COc1cc(CCC(=O)NCCCCC(=O)NNc2c3c(nc4cccc24)CCCC3)cc(OC)c1OC</chem>                       | 8.39                     |
| CHEMBL202661          | <chem>O=C(CCCCCNc1c2c(nc3cccc(Cl)c13)CCCC2)NCCc1c[nH]c2cccc12</chem>                          | 0.87                     |
| CHEMBL3322142         | <chem>CCN(CCC(=O)NCCCCNc1c2c(nc3cccc13)CCCC2)C1CCCCC1</chem>                                  | 94.2                     |
| CHEMBL3355580         | <chem>COc1cc(CCC(=O)/C=C/c2ccc(CNc3c4c(nc5cc(Cl)ccc35)CC3CC(C)=CC4C3)cc2)ccc1O</chem>         | 18.3                     |
| CHEMBL206093          | <chem>Cc1cccc1NC(=O)Oc1ccc2c(c1)[C@@]1(C)CCO[C@H]1O2</chem>                                   | 36                       |
| CHEMBL3355579         | <chem>COc1cc(CCC(=O)/C=C/CCCNc2c3c(nc4cc(Cl)ccc24)CC2CC(C)=CC3C2)ccc1O</chem>                 | 6.7                      |
| CHEMBL1651136         | <chem>COc1cccc1CN1CCC(CCC(=O)c2cc3c4c(ccn4C(=O)CC3)c2)CC1</chem>                              | 64.57                    |
| CHEMBL1083661         | <chem>O=C(CCC1CCN(Cc2cccc2)CC1)c1ccc2c(c1)CCCN2</chem>                                        | 64.57                    |
| CHEMBL95020           | <chem>O=C1Cc2c(ccc3c(CCC4CCN(Cc5cccc5)CC4)noc23)N1</chem>                                     | 3.6                      |
| CHEMBL1912059         | <chem>O=C(CCCC[C@H]1CCSS1)NCCCNc1c2c(nc3cc(Cl)ccc13)CCCC2</chem>                              | 0.23                     |
| CHEMBL3600552         | <chem>CC1=CC2Cc3nc4cc(Cl)ccc4c(NCCCCCCCCCCCCCNc4c5c(nc6cc(Cl)ccc46)CCCC5)c3C(C1)C2</chem>     | 3.46                     |
| CHEMBL3600556         | <chem>CC1=CC2Cc3nc4cccc4c(NCCCCCCCCCCCCCNc4c5c(nc6cc(Cl)ccc46)CCCC5)c3C(C1)C2</chem>          | 3.66                     |
| CHEMBL219569          | <chem>COc1cc(C(=O)NCCCCC(=O)NNc2c3c(nc4cccc24)CCCC3)cc(OC)c1OC</chem>                         | 5.65                     |
| CHEMBL382260          | <chem>COc1ccc2[nH]cc(CCN(C=O)CCCCCNc3c4c(nc5cccc35)CCCC4)c2c1</chem>                          | 0.65                     |
| CHEMBL381499          | <chem>O=C(CCCCCCNc1c2c(nc3cc(Cl)ccc13)CCCC2)NCCc1c[nH]c2cccc12</chem>                         | 0.1                      |
| CHEMBL1651140         | <chem>O=C(CCC1CCN(Cc2cccc(O)c2)CC1)c1cc2c3c(ccn3C(=O)CC2)c1</chem>                            | 8.71                     |
| CHEMBL359570          | <chem>O=C1Cc2cc3c(CCC4CCN(Cc5cccc5)CC4)noc3cc2N1</chem>                                       | 0.331                    |
| CHEMBL32823           | <chem>c1ccc2c(NCCCCCCCNc3c4c(nc5cccc35)CCCC4)c3c(nc2c1)CCCC3</chem>                           | 0.59                     |
| CHEMBL1651132         | <chem>O=C(CCC1CCN(Cc2cccc(F)c2)CC1)c1cc2c3c(ccn3C(=O)CC2)c1</chem>                            | 1.288                    |
| CHEMBL434378          | <chem>COc1cc(C(=O)NCCCCC(=O)NNc2c3c(nc4cccc24)CCCC3)cc(OC)c1OC</chem>                         | 18.2                     |
| CHEMBL426441          | <chem>CN1C(=O)Cc2cc3onc(CCC4CCN(Cc5cccc5)CC4)c3cc21</chem>                                    | 0.48                     |
| CHEMBL329231          | <chem>O=C1CCc2cc3c(CCC4CCN(Cc5cccc5)CC4)noc3cc2N1</chem>                                      | 0.575                    |
| CHEMBL340625          | <chem>CNC(=O)Oc1cccc(CN(C)CCCOc2ccc3ccc(=O)oc3c2)c1</chem>                                    | 5.7                      |
| CHEMBL370807          | <chem>O=C(CCCCCNc1c2c(nc3cccc13)CCCC2)NCCc1c[nH]c2ccc(O)cc12</chem>                           | 0.45                     |
| CHEMBL1651244         | <chem>O=C(CCC1CCN(Cc2cccc2)CC1)c1cc2c3c(c1)CCC(=O)N3CCC2</chem>                               | 15.85                    |
| CHEMBL216159          | <chem>COc1cc(C(=O)NCCCCC(=O)NNc2c3c(nc4cccc24)CCCC3)cc(OC)c1OC</chem>                         | 5.24                     |
| CHEMBL1651129         | <chem>O=C(CCC1CCN(Cc2cccc2)CC1)c1cc2c3c(c1)CC(=O)N3CCC2</chem>                                | 3.631                    |
| CHEMBL1651250         | <chem>O=C(CCC1CCN(Cc2ccc([N+](=O)[O-])cc2)CC1)c1cc2c3c(ccn3C(=O)CC2)c1</chem>                 | 42.66                    |
| CHEMBL1651127         | <chem>O=C(CCC1CCN(Cc2cccc2)CC1)c1ccc2c(c1)CCNCC2</chem>                                       | 25.12                    |
| CHEMBL1651131         | <chem>O=C(CCC1CCN(Cc2cccc2F)CC1)c1cc2c3c(ccn3C(=O)CC2)c1</chem>                               | 2.512                    |
| CHEMBL278963          | <chem>O=C(CCCCC1CCSS1)NCCCCCNc1c2c(nc3cccc13)CCCC2</chem>                                     | 30.1                     |
| CHEMBL238230          | <chem>O=C(CCCNc1c2c(nc3cccc13)CCCC2)CCCNc1c2c(nc3cccc13)CCCC2</chem>                          | 1.83                     |
| CHEMBL195067          | <chem>O=C(CCCCC1CCSS1)NCCCCCCCNc1c2c(nc3cccc13)CCCC2</chem>                                   | 32.7                     |
| CHEMBL235014          | <chem>c1ccc2c(NCCOCCOCCNc3c4c(nc5cccc35)CCCC4)c3c(nc2c1)CCCC3</chem>                          | 19.7                     |
| CHEMBL1651248         | <chem>O=C(CCC1CCN(Cc2ccc(F)cc2)CC1)c1cc2c3c(ccn3C(=O)CC2)c1</chem>                            | 4.571                    |
| CHEMBL328468          | <chem>O=C1Cc2cc3onc(CCC4CCN(Cc5cccc5)CC4)c3cc2N1</chem>                                       | 0.955                    |
| CHEMBL1912058         | <chem>O=C(CCCC[C@H]1CCSS1)NCCCNc1c2c(nc3cc(Cl)ccc13)CCCC2</chem>                              | 0.471                    |
| CHEMBL3355581         | <chem>COc1cc(CCC(=O)/C=C/c2ccc(CNc3c4c(nc5cc(Cl)ccc35)CC3CC(C)=CC4C3)cc2)cc(CN(C)C)c1O</chem> | 21.1                     |
| CHEMBL195179          | <chem>O=C(CCCCC1CCSS1)NCCCNc1c2c(nc3cccc13)CCCC2</chem>                                       | 6.96                     |
| CHEMBL1651130         | <chem>O=C(CCC1CCN(Cc2cccc2)CC1)c1cc2c3c(c1)CCN3C(=O)CC2</chem>                                | 9.772                    |
| CHEMBL340391          | <chem>CCc1cccc1NC(=O)Oc1ccc2c(c1)[C@]1(C)CCN(C)[C@@H]1N2C</chem>                              | 10                       |

Table S5. (Cont.)

| Molecule<br>ChEMBL ID | SMILES                                                                                                            | IC <sub>50</sub> (nM) |
|-----------------------|-------------------------------------------------------------------------------------------------------------------|-----------------------|
| CHEMBL92463           | <chem>Oc1ccc2c(CCC3CCN(Cc4ccccc4)CC3)noc2c1</chem>                                                                | 25.7                  |
| CHEMBL384886          | <chem>COc1cc(CCC(=O)NCCCC(=O)NNc2c3c(nc4ccccc24)CCCC3)cc(OC)c1OC</chem>                                           | 72.1                  |
| CHEMBL199670          | <chem>O=C(CCCCCCNc1c2c(nc3ccccc13)CCCC2)NCCc1c[nH]c2ccccc12</chem>                                                | 0.5                   |
| CHEMBL1651133         | <chem>O=C(CCC1CCN(Cc2ccccc2Cl)CC1)c1cc2c3c(ccn3C(=O)CC2)c1</chem>                                                 | 5.129                 |
| CHEMBL1651243         | <chem>O=C(CCC1CCN(Cc2cccc([N+](=O)[O-])c2)CC1)c1cc2c3c(ccn3C(=O)CC2)c1</chem>                                     | 2.884                 |
| CHEMBL1651245         | <chem>O=C(CCC1CCN(Cc2cccc2)CC1)c1cc2c3c(c1)CCN3C(=O)CCC2</chem>                                                   | 52.48                 |
| CHEMBL424833          | <chem>O=C(CCCCC1CCSS1)NCCCCNc1c2c(nc3ccccc13)CCCC2</chem>                                                         | 35.2                  |
| CHEMBL3353040         | <chem>CC1=CC2Cc(n3)c(C(C2)Cl)c(NCCCCCCCCNc(c4c(CC5C=C(CC4C5)C)n6)c7c6cc(Cl)cc7)c8c3cc(Cl)cc8</chem>               | 72.5                  |
| CHEMBL1651139         | <chem>O=C(CCC1CCN(Cc2ccccc2O)CC1)c1cc2c3c(ccn3C(=O)CC2)c1</chem>                                                  | 1.096                 |
| CHEMBL1651141         | <chem>O=C(CCC1CCN(Cc2cccc2[N+](=O)[O-])CC1)c1cc2c3c(ccn3C(=O)CC2)c1</chem>                                        | 89.13                 |
| CHEMBL1179697         | <chem>CN1C(=O)Cc2cc3c(CCC4CCN(Cc5ccccc5)CC4)noc3cc21</chem>                                                       | 0.479                 |
| CHEMBL1651134         | <chem>O=C(CCC1CCN(Cc2cccc(Cl)c2)CC1)c1cc2c3c(ccn3C(=O)CC2)c1</chem>                                               | 4.898                 |
| CHEMBL4208641         | <chem>c1ccc2c(NCCCCSSCCCCNc3c4c(nc5ccccc35)CCCC4)c3c(nc2c1)CCCC3</chem>                                           | 1.62                  |
| CHEMBL3600555         | <chem>CC1=CC2Cc3nc4ccccc4c(NCCCCCCCCCCNc4c5c(nc6cc(Cl)ccc46)CCCC5)c3C(C1)C2</chem>                                | 1.48                  |
| CHEMBL1651249         | <chem>O=C(CCC1CCN(Cc2ccc(O)cc2)CC1)c1cc2c3c(ccn3C(=O)CC2)c1</chem>                                                | 0.489                 |
| CHEMBL128390          | <chem>CCCCCCCNC(=O)Oc1cccc(CN(C)CCCOc2ccc3c(=O)c4ccnc4oc3c2)c1</chem>                                             | 42.0                  |
| CHEMBL128551          | <chem>CCCCNC(=O)Oc1cccc(CN(C)CCCOc2ccc3ccc(=O)oc3c2)c1</chem>                                                     | 14.0                  |
| CHEMBL3600553         | <chem>CC1=CC2Cc3nc4ccccc4c(NCCCCCCCCCCNc4c5c(nc6ccccc46)CCCC5)c3C(C1)C2</chem>                                    | 6.46                  |
| CHEMBL1912060         | <chem>O=C(CCCCCc1cccs1)NCCCNc1c2c(nc3cc(Cl)ccc13)CCCC2</chem>                                                     | 2.66                  |
| CHEMBL3353041         | <chem>CC1=C[C@H]2Cc3nc4cc(Cl)ccc4c(NCCCCCCCCCCNc4c5c(nc6cc(Cl)ccc46)C[C@@H]4C=C(C)C[C@H]5C4)c3[C@@H](C1)C2</chem> | 17.5                  |
| CHEMBL3600554         | <chem>CC1=CC2Cc3nc4ccccc4c(NCCCCCCCCCCCCNc4c5c(nc6ccccc46)CCCC5)c3C(C1)C2</chem>                                  | 10.1                  |
| CHEMBL3600551         | <chem>CC1=CC2Cc3nc4cc(Cl)ccc4c(NCCCCCCCCCCCCNc4c5c(nc6ccccc46)CCCC5)c3C(C1)C2</chem>                              | 1.92                  |
| CHEMBL4204315         | <chem>c1ccc2c(NCCCC[Se][Se]CCCCNc3c4c(nc5ccccc35)CCCC4)c3c(nc2c1)CCCC3</chem>                                     | 2.64                  |
| CHEMBL4213042         | <chem>c1ccc2c(NCCCC[Se]CCCCNc3c4c(nc5ccccc35)CCCC4)c3c(nc2c1)CCCC3</chem>                                         | 2.25                  |

**Table S6.** Structures and bioactivities of 144 BACE1 inhibitors

| Molecule<br>ChEMBL ID | SMILES                                                                                                    | IC <sub>50</sub><br>(nM) |
|-----------------------|-----------------------------------------------------------------------------------------------------------|--------------------------|
| CHEMBL2181911         | <chem>CO[C@H](C)C(=O)N[C@@H](Cc1cccc(-c2nccs2)c1)[C@H](O)CN[C@H]1CC2(CCC2)Oc2ncc(CC(C)(C)C)cc21</chem>    | 5.5                      |
| CHEMBL2181890         | <chem>COCC(=O)N[C@@H](Cc1cccc(-c2ncco2)c1)[C@H](O)CN[C@H]1CC2(CCC2)Oc2ncc(CC(C)(C)C)cc21</chem>           | 9.6                      |
| CHEMBL2181914         | <chem>COC(OC)C(=O)N[C@@H](Cc1cccc(-c2nccs2)c1)[C@H](O)CN[C@H]1CC2(CCC2)Oc2ncc(CC(C)(C)C)cc21</chem>       | 9.8                      |
| CHEMBL2181910         | <chem>CCOCC(=O)N[C@@H](Cc1cccc(-c2nccs2)c1)[C@H](O)CN[C@H]1CC2(CCC2)Oc2ncc(CC(C)(C)C)cc21</chem>          | 5.7                      |
| CHEMBL2181886         | <chem>CC(=O)N[C@@H](Cc1ccc(OC(F)F)c(OC(F)F)c1)[C@H](O)CN[C@H]1CC2(CCC2)Oc2ncc(CC(C)(C)C)cc21</chem>       | 35.2                     |
| CHEMBL2181907         | <chem>C#Cc1ccc(F)c(C[C@H](NC(=O)COC)[C@H](O)CN[C@H]2CC3(CCC3)Oc3ncc(CC(C)(C)C)cc32)c1</chem>              | 2.9                      |
| CHEMBL2181881         | <chem>CC(C)(C)Cc1cnc2c(c1)[C@@H](NC[C@@H](O)[C@H](Cc1ccc3c(c1)OCO3)NC(=O)[C@@H]1CCCCO1)CC1(CCC1)O2</chem> | 20.4                     |
| CHEMBL3359755         | <chem>CC1(C)C=C(c2cnc3c(c2)[C@]2(COC(N)=N2)c2cc(-c4ccnc4F)ccc2O3)CCO1</chem>                              | 0.9                      |
| CHEMBL3354692         | <chem>COC(C)(C)C#Cc1ccc2c(c1)[C@]1(COC(N)=N1)c1cc(-c3cncnc3)ccc1O2</chem>                                 | 7.0                      |
| CHEMBL3394044         | <chem>NC1=N[C@@]2(CO1)c1cc(-c3ccnc3F)ccc1Oc1cnc([C@@H]3CCCCO3)cc12</chem>                                 | 18.5                     |
| CHEMBL2181829         | <chem>CC(=O)N[C@@H](Cc1ccc2c(c1)OCCO2)[C@H](O)CN[C@H]1CC2(CCC2)Oc2ncc(CC(C)(C)C)cc21</chem>               | 22.8                     |
| CHEMBL3359760         | <chem>CC(C)(C)C#Cc1cnc2c(c1)[C@]1(COC(N)=N1)c1cc(-c3ccnc3F)ccc1O2</chem>                                  | 4.7                      |
| CHEMBL3359761         | <chem>COC(C)(C)C#Cc1cnc2c(c1)[C@]1(COC(N)=N1)c1cc(-c3ccnc3F)ccc1O2</chem>                                 | 4.6                      |
| CHEMBL3359758         | <chem>N#Cc1ccc(-c2cnc3c(c2)[C@]2(COC(N)=N2)c2cc(-c4ccnc4F)ccc2O3)cc1</chem>                               | 0.8                      |
| CHEMBL3354693         | <chem>NC1=N[C@]2(CO1)c1cc(C3=CCOCC3)ccc1Oc1ccc(-c3cncnc3)cc12</chem>                                      | 4.0                      |
| CHEMBL3354702         | <chem>CC(C)(C)COc1ccc2c(c1)[C@]1(COC(N)=N1)c1cc(-c3ccnc3)ccc1O2</chem>                                    | 23                       |
| CHEMBL3359753         | <chem>NC1=N[C@@]2(CO1)c1cc(-c3ccnc3F)ccc1Oc1cnc(C3=CCCO3)cc12</chem>                                      | 1.2                      |
| CHEMBL3354688         | <chem>CC(C)(C)COc1ccc2c(c1)[C@]1(COC(N)=N1)c1cc(-c3cncnc3)ccc1O2</chem>                                   | 2.2                      |
| CHEMBL3394046         | <chem>NC1=N[C@@]2(CO1)c1cc(-c3ccnc3F)ccc1Oc1cnc(N3CCOCC3)cc12</chem>                                      | 1.3                      |
| CHEMBL584917          | <chem>CN1C(=O)C(c2cccc(-c3ccnc3)c2)(c2ccc3c(c2)OCCO3)N=C1N</chem>                                         | 89.95                    |
| CHEMBL3394041         | <chem>NC1=N[C@@]2(CO1)c1cc(-c3ccnc3F)ccc1Oc1cnc(C3=CCCO3)cc12</chem>                                      | 0.5                      |
| CHEMBL3394045         | <chem>NC1=N[C@@]2(CO1)c1cc(-c3ccnc3F)ccc1Oc1cnc([C@H]3CCCCO3)cc12</chem>                                  | 2.2                      |
| CHEMBL3394050         | <chem>NC1=N[C@@]2(CO1)c1cc(-c3ccnc3F)ccc1Oc1cnc(N3CC[C@H](F)C3)cc12</chem>                                | 2.7                      |
| CHEMBL3394211         | <chem>NC1=N[C@@]2(CO1)c1cc(-c3ccnc3F)ccc1Oc1c2cc(-c2ccnc2)nc1F</chem>                                     | 0.3                      |
| CHEMBL3394215         | <chem>NC1=N[C@@]2(CO1)c1cc(-c3ccnc3F)ccc1Oc1c2cc(-c2ccnc2F)nc1F</chem>                                    | 1.2                      |
| CHEMBL3394218         | <chem>NC1=N[C@@]2(CO1)c1cc(-c3ccnc3F)ccc1Oc1c2cc(C2=COCCC2)nc1F</chem>                                    | 0.2                      |
| CHEMBL3354701         | <chem>CC1(COc2ccc3c(c2)[C@]2(COC(N)=N2)c2cc(-c4cncnc4)ccc2O3)COC1</chem>                                  | 7.0                      |
| CHEMBL2181901         | <chem>COCC(=O)N[C@@H](Cc1ccc(F)c(-c2nccs2)c1)[C@H](O)CN[C@H]1CC2(CCC2)Oc2ncc(CC(C)(C)C)cc21</chem>        | 6.1                      |
| CHEMBL2181893         | <chem>COCC(=O)N[C@@H](Cc1cccc(-c2cncs2)c1)[C@H](O)CN[C@H]1CC2(CCC2)Oc2ncc(CC(C)(C)C)cc21</chem>           | 5.2                      |
| CHEMBL3354708         | <chem>COc1cncnc(-c2ccc3c(c2)[C@@]2(COC(N)=N2)c2cc(OCC(C)(C)C)ccc2O3)c1</chem>                             | 4.0                      |
| CHEMBL3354714         | <chem>CC1(COc2ccc3c(c2)[C@]2(COC(N)=N2)c2cc(-c4ccnc4)cc(F)c2O3)COC1</chem>                                | 71                       |
| CHEMBL3354690         | <chem>CC(C)(C)CCc1ccc2c(c1)[C@]1(COC(N)=N1)c1cc(-c3cncnc3)ccc1O2</chem>                                   | 3.1                      |
| CHEMBL3354705         | <chem>CC(C)(C)COc1ccc2c(c1)[C@]1(COC(N)=N1)c1cc(-c3ccc(F)nc3)ccc1O2</chem>                                | 6.0                      |
| CHEMBL3394226         | <chem>NC1=N[C@@]2(CO1)c1cc(-c3ccnc3F)ccc1Oc1c2cc(N2CCC(F)(F)C2)nc1F</chem>                                | 0.2                      |

Table S6. (Cont.)

| Molecule<br>ChEMBL ID | SMILES                                                                                                      | IC <sub>50</sub><br>(nM) |
|-----------------------|-------------------------------------------------------------------------------------------------------------|--------------------------|
| CHEMBL2407492         | <chem>CC(C)(C)Cc1cnc2c(c1)[C@@H](NC[C@@H](O)[C@@H]1Cc3cccc(c3)CCc3cc(ccc3=O)C(=O)N1)CC1(CCC1)O2</chem>      | 2.7                      |
| CHEMBL3359748         | <chem>CC(C)(C)COc1cnc2c(c1)[C@]1(COC(N)=N1)c1cc(-c3ccnc3)ccc1O2</chem>                                      | 0.6                      |
| CHEMBL2181913         | <chem>CCO[C@H](C)C(=O)N[C@@H](Cc1cccc(-c2nccs2)c1)[C@H](O)CN[C@H]1CC2(CCC2)Oc2ncc(CC(C)(C)C)cc21</chem>     | 16                       |
| CHEMBL384496          | <chem>CC[C@H](NCC1Cc2cccc(c2)OCCNC(=O)c2cc(cc(N(C)S(C)(=O)=O)c2)C(=O)N1)C(=O)NCC(C)C</chem>                 | 32                       |
| CHEMBL3354710         | <chem>CC(C)(C)COc1ccc2c(c1)[C@]1(COC(N)=N1)c1cc(-c3c(F)ccnc3F)ccc1O2</chem>                                 | 0.5                      |
| CHEMBL3394056         | <chem>Cc1cc(-c2cc3c(cn2)Oc2ccc(-c4ccnc4F)cc2[C@@]32COC(N)=N2)ccn1</chem>                                    | 2.4                      |
| CHEMBL3394213         | <chem>Cc1ccc(-c2cc3c(c(F)n2)Oc2ccc(-c4ccnc4F)cc2[C@@]32COC(N)=N2)cn1</chem>                                 | 0.4                      |
| CHEMBL3394214         | <chem>Cc1cc(-c2cc3c(c(F)n2)Oc2ccc(-c4ccnc4F)cc2[C@@]32COC(N)=N2)ccn1</chem>                                 | 0.8                      |
| CHEMBL3354718         | <chem>NC1=N[C@@]2(CO1)c1cc(-c3ccnc3F)ccc1Oc1c(F)cc(C3=CCOCC3)cc12</chem>                                    | 0.3                      |
| CHEMBL3394223         | <chem>NC1=N[C@@]2(CO1)c1cc(-c3ccnc3F)ccc1Oc1c2cc(C2CCOCC2)nc1F</chem>                                       | 0.7                      |
| CHEMBL2181884         | <chem>CC(C)(C)Cc1cnc2c(c1)[C@@H](NC[C@@H](O)[C@H](Cc1ccc3c(c1)OCO3)NC(=O)c1ccnc1F)CC1(CCC1)O2</chem>        | 33.2                     |
| CHEMBL2181897         | <chem>CC#Cc1cccc(C[C@H](NC(=O)COC)[C@H](O)CN[C@H]2CC3(CCC3)Oc3ncc(CC(C)(C)C)cc32)c1</chem>                  | 15                       |
| CHEMBL2181898         | <chem>COCC(=O)N[C@@H](Cc1ccc(-c2nccs2)cc1)[C@H](O)CN[C@H]1CC2(CCC2)Oc2ncc(CC(C)(C)C)cc21</chem>             | 29                       |
| CHEMBL3394210         | <chem>NC1=N[C@@]2(CO1)c1cc(-c3ccnc3F)ccc1Oc1c2cc(-c2ccccc2)nc1F</chem>                                      | 0.7                      |
| CHEMBL3394228         | <chem>Cc1cc(-c2cc3c(c(F)n2)Oc2ccc(-c4ccnc4F)cc2[C@@]32COC(N)=N2)on1</chem>                                  | 0.3                      |
| CHEMBL3394055         | <chem>NC1=N[C@@]2(CO1)c1cc(-c3ccnc3F)ccc1Oc1cnc(-c3ccnc3)cc12</chem>                                        | 2.5                      |
| CHEMBL565914          | <chem>NC1=NC(c2ccc(OC(F)(F)F)cc2)(c2cccc(-c3ccnc3F)c2)C2=NCCCCN12</chem>                                    | 80                       |
| CHEMBL2181882         | <chem>C[C@@H](F)C(=O)N[C@@H](Cc1ccc2c(c1)OCO2)[C@H](O)CN[C@H]1CC2(CCC2)Oc2ncc(CC(C)(C)C)cc21</chem>         | 28.9                     |
| CHEMBL2181880         | <chem>CO[C@H](C)C(=O)N[C@@H](Cc1ccc2c(c1)OCO2)[C@H](O)CN[C@H]1CC2(CCC2)Oc2ncc(CC(C)(C)C)cc21</chem>         | 16.8                     |
| CHEMBL3265334         | <chem>NC1=N[C@@]2(CO1)c1cc(-c3cc(F)cc(Cl)c3)ccc1O[C@@H]1COCC[C@H]12</chem>                                  | 60                       |
| CHEMBL3354700         | <chem>CC(C)(C#N)COc1ccc2c(c1)[C@]1(COC(N)=N1)c1cc(-c3cnnc3)ccc1O2</chem>                                    | 9                        |
| CHEMBL3260839         | <chem>CN1C(=O)C2(N=C1N)c1cc(-c3ccnc3F)ccc1Oc1c(F)cc(-c3ccnc(F)c3)cc12</chem>                                | 0.2                      |
| CHEMBL2407489         | <chem>CCc1ccc2c(c1)[C@@H](NC[C@@H](O)[C@@H]1Cc3cccc(c3)CCCCn3cc(cc(-c4cccn4)c3=O)C(=O)N1)CC1(CCC1)O2</chem> | 5.9                      |
| CHEMBL2407339         | <chem>C=CCCCC(=O)N[C@@H](Cc1cccc(CC=C)c1)[C@H](O)CN[C@H]1CC2(CCC2)Oc2ncc(CC(C)(C)C)cc21</chem>              | 4.7                      |
| CHEMBL2407340         | <chem>C=CCc1cccc(C[C@H](NC(=O)c2cc(Br)c(=O)n(CC=C)c2)[C@H](O)CN[C@H]2CC3(CCC3)Oc3ccc(CC)cc32)c1</chem>      | 81                       |
| CHEMBL1821820         | <chem>Cc1cccc1-c1ccc2nc(N)c(C[C@@H](C)C(=O)NCCC(C)(C)C)cc2c1</chem>                                         | 0.65                     |
| CHEMBL2181908         | <chem>CC(=O)N[C@@H](Cc1cccc(-c2nccs2)c1)[C@H](O)CN[C@H]1CC2(CCC2)Oc2ncc(CC(C)(C)C)cc21</chem>               | 3.7                      |
| CHEMBL2181906         | <chem>C#Cc1cc(F)cc(C[C@H](NC(=O)COC)[C@H](O)CN[C@H]2CC3(CCC3)Oc3ncc(CC(C)(C)C)cc32)c1</chem>                | 1.9                      |
| CHEMBL3394048         | <chem>NC1=N[C@@]2(CO1)c1cc(-c3ccnc3F)ccc1Oc1cnc(N3CCC(F)(F)CC3)cc12</chem>                                  | 0.7                      |
| CHEMBL3394051         | <chem>NC1=N[C@@]2(CO1)c1cc(-c3ccnc3F)ccc1Oc1cnc(N3CC[C@H](F)C3)cc12</chem>                                  | 0.5                      |
| CHEMBL3354713         | <chem>CC1(COc2cc(F)c3c(c2)[C@]2(COC(N)=N2)c2cc(-c4ccnc4)ccc2O3)COC1</chem>                                  | 1.0                      |
| CHEMBL2181915         | <chem>CC(C)(C)Cc1cnc2c(c1)[C@@H](NC[C@@H](O)[C@H](Cc1cccc(-c3nccs3)c1)NC(=O)[C@H]1CCCC1)CC1(CCC1)O2</chem>  | 6.3                      |
| CHEMBL2181905         | <chem>C#Cc1cc(C[C@H](NC(=O)COC)[C@H](O)CN[C@H]2CC3(CCC3)Oc3ncc(CC(C)(C)C)cc32)ccc1F</chem>                  | 3.7                      |

Table S6. (Cont.)

| Molecule<br>ChEMBL ID | SMILES                                                                                                      | IC <sub>50</sub><br>(nM) |
|-----------------------|-------------------------------------------------------------------------------------------------------------|--------------------------|
| CHEMBL3354697         | <chem>CC(C)(O)COc1ccc2c(c1)[C@]1(COC(N)=N1)c1cc(-c3cnnc3)ccc1O2</chem>                                      | 7.0                      |
| CHEMBL3354706         | <chem>CC(C)(C)COc1ccc2c(c1)[C@]1(COC(N)=N1)c1cc(-c3cnnc(C#N)c3)ccc1O2</chem>                                | 3.0                      |
| CHEMBL3354711         | <chem>CC1(COc2ccc3c(c2)[C@]2(COC(N)=N2)c2cc(-c4ccnc4)ccc2O3)COC1</chem>                                     | 7.0                      |
| CHEMBL2181909         | <chem>CCC(=O)N[C@@H](Cc1cccc(-c2nccs2)c1)[C@H](O)CN[C@H]1CC2(CCC2)Oc2ncc(CC(C)(C)C)cc21</chem>              | 11                       |
| CHEMBL2181904         | <chem>C#Cc1cccc(C[C@H](NC(=O)COC)[C@H](O)CN[C@H]2CC3(CCC3)Oc3ncc(CC(C)(C)C)cc32)c1F</chem>                  | 11                       |
| CHEMBL2181903         | <chem>COCC(=O)N[C@@H](Cc1cc(-c2nccs2)ccc1F)[C@H](O)CN[C@H]1CC2(CCC2)Oc2ncc(CC(C)(C)C)cc21</chem>            | 9.5                      |
| CHEMBL2181902         | <chem>COCC(=O)N[C@@H](Cc1cc(F)cc(-c2nccs2)c1)[C@H](O)CN[C@H]1CC2(CCC2)Oc2ncc(CC(C)(C)C)cc21</chem>          | 1.9                      |
| CHEMBL2181899         | <chem>C#Cc1ccc(C[C@H](NC(=O)COC)[C@H](O)CN[C@H]2CC3(CCC3)Oc3ncc(CC(C)(C)C)cc32)cc1</chem>                   | 47                       |
| CHEMBL2181889         | <chem>COCC(=O)N[C@@H](Cc1cccc(-c2cccn2)c1)[C@H](O)CN[C@H]1CC2(CCC2)Oc2ncc(CC(C)(C)C)cc21</chem>             | 9.3                      |
| CHEMBL2181916         | <chem>CC(C)(C)Cc1cnc2c(c1)[C@@H](NC[C@@H](O)[C@H](Cc1cccc(-c3nccs3)c1)NC(=O)[C@@H]1CCCO1)CC1(CCC1)O2</chem> | 9.2                      |
| CHEMBL2407491         | <chem>CC(C)(C)Cc1cnc2c(c1)[C@@H](NC[C@@H](O)[C@H]1Cc3cccc(c3)CCCCn3cc(ccc3=O)C(=O)N1)CC1(CCC1)O2</chem>     | 9.7                      |
| CHEMBL3359757         | <chem>Cc1ccc(-c2cnc3c(c2)[C@]2(COC(N)=N2)c2cc(-c4ccnc4F)ccc2O3)cc1</chem>                                   | 0.9                      |
| CHEMBL3359747         | <chem>CC(C)(C)COc1cnc2c(c1)[C@]1(COC(N)=N1)c1cc(-c3cnnc3)ccc1O2</chem>                                      | 0.7                      |
| CHEMBL3394049         | <chem>NC1=N[C@@]2(CO1)c1cc(-c3ccnc3F)ccc1Oc1cnc(N3CCC(F)(F)C3)cc12</chem>                                   | 0.6                      |
| CHEMBL2181828         | <chem>CC(C)(C)Cc1cnc2c(c1)[C@@H](NC[C@@H](O)[C@H](Cc1ccc3c(c1)OCO3)NC(=O)c1ccc(F)nc1)CC1(CCC1)O2</chem>     | 48.4                     |
| CHEMBL2181892         | <chem>COCC(=O)N[C@@H](Cc1cccc(-c2nccs2)c1)[C@H](O)CN[C@H]1CC2(CCC2)Oc2ncc(CC(C)(C)C)cc21</chem>             | 4.1                      |
| CHEMBL2181887         | <chem>CC(=O)N[C@@H](Cc1ccc2c(c1)OCO2)[C@H](O)CN[C@H]1CC2(CCC2)Oc2ncc(CC(C)(C)C)cc21</chem>                  | 8.0                      |
| CHEMBL3359756         | <chem>NC1=N[C@@]2(CO1)c1cc(-c3ccnc3F)ccc1Oc1ncc(N3CCOCC3)cc12</chem>                                        | 3.3                      |
| CHEMBL3359749         | <chem>CC(C)(C)COc1cnc2c(c1)[C@]1(COC(N)=N1)c1cc(-c3ccnc3F)ccc1O2</chem>                                     | 0.4                      |
| CHEMBL3394039         | <chem>NC1=N[C@@]2(CO1)c1cc(-c3ccnc3F)ccc1Oc1cnc(C3=CCOCC3)cc12</chem>                                       | 0.7                      |
| CHEMBL3394047         | <chem>CC1(C)CN(c2cc3c(cn2)Oc2ccc(-c4ccnc4F)cc2[C@@]32COC(N)=N2)CCO1</chem>                                  | 4.0                      |
| CHEMBL3354715         | <chem>CC1(COc2cc(F)c3c(c2)[C@]2(COC(N)=N2)c2cc(-c4ccnc4F)ccc2O3)COC1</chem>                                 | 0.4                      |
| CHEMBL2181896         | <chem>C#Cc1cccc(C[C@H](NC(=O)COC)[C@H](O)CN[C@H]2CC3(CCC3)Oc3ncc(CC(C)(C)C)cc32)c1</chem>                   | 3.4                      |
| CHEMBL2181891         | <chem>COCC(=O)N[C@@H](Cc1cccc(-c2ncn2C)c1)[C@H](O)CN[C@H]1CC2(CCC2)Oc2ncc(CC(C)(C)C)cc21</chem>             | 64                       |
| CHEMBL3394054         | <chem>NC1=N[C@@]2(CO1)c1cc(-c3ccnc3F)ccc1Oc1cnc(-c3ccnc3)cc12</chem>                                        | 2.5                      |
| CHEMBL2181894         | <chem>COCC(=O)N[C@@H](Cc1cccc(-c2cscn2)c1)[C@H](O)CN[C@H]1CC2(CCC2)Oc2ncc(CC(C)(C)C)cc21</chem>             | 6.9                      |
| CHEMBL2030997         | <chem>CC(=O)N[C@@H](Cc1ccc(F)cc1)[C@H](O)CN[C@H]1CC2(CCC2)Oc2ncc(CC(C)(C)C)cc21</chem>                      | 5.0                      |
| CHEMBL2181895         | <chem>COCC(=O)N[C@@H](Cc1cccc(-c2nc(C)cs2)c1)[C@H](O)CN[C@H]1CC2(CCC2)Oc2ncc(CC(C)(C)C)cc21</chem>          | 5.7                      |
| CHEMBL2181827         | <chem>CC(C)(C)Cc1cnc2c(c1)[C@@H](NC[C@@H](O)[C@H](Cc1ccc3c(c1)OCO3)NC(=O)c1ccnc1)CC1(CCC1)O2</chem>         | 26.1                     |
| CHEMBL2181883         | <chem>CC(C)(C)Cc1cnc2c(c1)[C@@H](NC[C@@H](O)[C@H](Cc1ccc3c(c1)OCO3)NC(=O)c1cccc1F)CC1(CCC1)O2</chem>        | 76.6                     |

**Table S6.** Structures and bioactivities of 144 BACE1 inhibitors

| Molecule<br>ChEMBL ID | SMILES                                                                                                  | IC <sub>50</sub><br>(nM) |
|-----------------------|---------------------------------------------------------------------------------------------------------|--------------------------|
| CHEMBL3359754         | <chem>NC1=N[C@@]2(CO1)c1cc(-c3ccnc3F)ccc1Oc1ncc(C3CCOCC3)cc12</chem>                                    | 5.6                      |
| CHEMBL3394040         | <chem>CC1(C)C=C(c2cc3c(cn2)Oc2ccc(-c4ccnc4F)cc2[C@@]32COC(N)=N2)CCO1</chem>                             | 0.9                      |
| CHEMBL1271450         | <chem>CN1C(=O)[C@@](c2ccc(OCCF)cc2)(c2ccc(-c3ccnc3F)c2)N=C1N</chem>                                     | 30                       |
| CHEMBL3394058         | <chem>NC1=N[C@]2(CO1)c1cc(C3=CCOCC3)ccc1Oc1ccc(-c3ccnc3F)cc12</chem>                                    | 2.6                      |
| CHEMBL3394212         | <chem>NC1=N[C@@]2(CO1)c1cc(-c3ccnc3F)ccc1Oc1c2cc(-c2ccnc2)nc1F</chem>                                   | 0.4                      |
| CHEMBL3394227         | <chem>NC1=N[C@@]2(CO1)c1cc(-c3ccnc3F)ccc1Oc1c2cc(N2CC[C@@H](F)C2)nc1F</chem>                            | 0.2                      |
| CHEMBL3354689         | <chem>CC(C)(C)C#Cc1ccc2c(c1)[C@]1(COC(N)=N1)c1cc(-c3cnnc3)ccc1O2</chem>                                 | 2                        |
| CHEMBL3354695         | <chem>CC1(C)CN(c2ccc3c(c2)[C@]2(COC(N)=N2)c2cc(-c4cnnc4)ccc2O3)CCO1</chem>                              | 11                       |
| CHEMBL3354699         | <chem>CC(C)(F)COc1ccc2c(c1)[C@]1(COC(N)=N1)c1cc(-c3cnnc3)ccc1O2</chem>                                  | 8                        |
| CHEMBL3354709         | <chem>CC(C)(C)COc1ccc2c(c1)[C@]1(COC(N)=N1)c1cc(-c3ccnc3F)ccc1O2</chem>                                 | 0.8                      |
| CHEMBL2181912         | <chem>CO[C@@H](C)C(=O)N[C@@H](Cc1cccc(-c2nccs2)c1)[C@H](O)CN[C@H]1CC2(CCC2)Oc2ncc(CC(C)(C)C)cc21</chem> | 7.2                      |
| CHEMBL2181830         | <chem>COCC(=O)N[C@@H](Cc1ccc2c(c1)OCO2)[C@H](O)CN[C@H]1CC2(CCC2)Oc2ncc(CC(C)(C)C)cc21</chem>            | 5.4                      |
| CHEMBL3359752         | <chem>NC1=N[C@@]2(CO1)c1cc(-c3ccnc3F)ccc1Oc1ncc(C3=CCOCC3)cc12</chem>                                   | 1.5                      |
| CHEMBL3354707         | <chem>CC(C)(C)COc1ccc2c(c1)[C@]1(COC(N)=N1)c1cc(-c3cncc(F)c3)ccc1O2</chem>                              | 4.0                      |
| CHEMBL3394042         | <chem>NC1=N[C@@]2(CO1)c1cc(-c3ccnc3F)ccc1Oc1ncc(C3CCOCC3)cc12</chem>                                    | 7.1                      |
| CHEMBL3394222         | <chem>NC1=N[C@@]2(CO1)c1cc(-c3ccnc3F)ccc1Oc1c2cc(C2CCCOC2)nc1F</chem>                                   | 1                        |
| CHEMBL3394225         | <chem>NC1=N[C@@]2(CO1)c1cc(-c3ccnc3F)ccc1Oc1c2cc(N2CCC(F)(F)CC2)nc1F</chem>                             | 0.3                      |
| CHEMBL2181900         | <chem>COCC(=O)N[C@@H](Cc1cccc(-c2nccs2)c1F)[C@H](O)CN[C@H]1CC2(CCC2)Oc2ncc(CC(C)(C)C)cc21</chem>        | 71                       |
| CHEMBL2181888         | <chem>COCC(=O)N[C@@H](Cc1cccc(-c2ccnc2)c1)[C@H](O)CN[C@H]1CC2(CCC2)Oc2ncc(CC(C)(C)C)cc21</chem>         | 33                       |
| CHEMBL3359762         | <chem>CC(C)(O)C#Cc1cnc2c(c1)[C@]1(COC(N)=N1)c1cc(-c3ccnc3F)ccc1O2</chem>                                | 1.2                      |
| CHEMBL3359751         | <chem>COC(C)(C)COc1cnc2c(c1)[C@]1(COC(N)=N1)c1cc(-c3ccnc3F)ccc1O2</chem>                                | 1.8                      |
| CHEMBL2181917         | <chem>C[C@@H](O)C(=O)N[C@@H](Cc1cccc(-c2nccs2)c1)[C@H](O)CN[C@H]1CC2(CCC2)Oc2ncc(CC(C)(C)C)cc21</chem>  | 3.2                      |
| CHEMBL3394057         | <chem>NC1=N[C@@]2(CO1)c1cc(-c3ccnc3F)ccc1Oc1ncc(-c3ccnc(F)c3)cc12</chem>                                | 0.9                      |
| CHEMBL3394221         | <chem>NC1=N[C@@]2(CO1)c1cc(-c3ccnc3F)ccc1Oc1c2cc(C2=CCOCC2)nc1F</chem>                                  | 0.3                      |
| CHEMBL3394052         | <chem>NC1=N[C@@]2(CO1)c1cc(-c3ccnc3F)ccc1Oc1ncc(-c3cccc3)cc12</chem>                                    | 1.4                      |
| CHEMBL4294221         | <chem>NC1=N[C@@]2(CO1)c1cc(NC(=O)c3ccc(Cl)cn3)ccc1Oc1ncc(C3=CCCOC3)cc12</chem>                          | 0.62                     |
| CHEMBL3394219         | <chem>NC1=N[C@@]2(CO1)c1cc(-c3ccnc3F)ccc1Oc1c2cc(C2=CCCCO2)nc1F</chem>                                  | 0.4                      |
| CHEMBL3394043         | <chem>NC1=N[C@@]2(CO1)c1cc(-c3ccnc3F)ccc1Oc1ncc(C3CCCOC3)cc12</chem>                                    | 11.3                     |
| CHEMBL3394217         | <chem>NC1=N[C@@]2(CO1)c1cc(-c3ccnc3F)ccc1Oc1c2cc(-c2ccnc(F)c2)nc1F</chem>                               | 0.4                      |
| CHEMBL3394220         | <chem>NC1=N[C@@]2(CO1)c1cc(-c3ncccc3F)ccc1Oc1c2cc(C2=CCCOC2)nc1F</chem>                                 | 0.3                      |
| CHEMBL3354704         | <chem>CC(C)(C)COc1ccc2c(c1)[C@]1(COC(N)=N1)c1cc(-c3ccnc3)ccc1O2</chem>                                  | 4.0                      |
| CHEMBL3640264         | <chem>COc1nc(N2C[C@H]3C(=O)N(C)C(N)=N[C@@]3(c3cccc3F)C2)nc(C)c1Cl</chem>                                | 32                       |
| CHEMBL3359759         | <chem>NC1=N[C@@]2(CO1)c1cc(-c3ccnc3F)ccc1Oc1ncc(-c3ccnc(F)c3)cc12</chem>                                | 2.3                      |
| CHEMBL3394224         | <chem>NC1=N[C@@]2(CO1)c1cc(-c3ccnc3F)ccc1Oc1c2cc(N2CCOCC2)nc1F</chem>                                   | 0.3                      |
| CHEMBL3394053         | <chem>NC1=N[C@@]2(CO1)c1cc(-c3ccnc3F)ccc1Oc1ncc(-c3cccc3)cc12</chem>                                    | 3.8                      |
| CHEMBL3354691         | <chem>CC(C)(O)C#Cc1ccc2c(c1)[C@]1(COC(N)=N1)c1cc(-c3cnnc3)ccc1O2</chem>                                 | 2.0                      |
| CHEMBL3354712         | <chem>CC1(COc2cc3c(cc2F)Oc2ccc(-c4ccnc4)cc2[C@@]32COC(N)=N2)COC1</chem>                                 | 4.0                      |
| CHEMBL4279496         | <chem>CC1(C#Cc2ncc(-c3ccc4c(c3)[C@@]3(COC(N)=N3)c3cc(C5=CCOCC5)ncc3O4)c2)COC1</chem>                    | 5.5                      |
| CHEMBL4279064         | <chem>NC1=N[C@@]2(CO1)c1cc(NC(=O)c3ccc(Cl)cn3)ccc1Oc1ncc(C3CC3)cc12</chem>                              | 3.6                      |



Table S6. (Cont.)

| Molecule<br>ChEMBL ID | SMILES                                                                           | IC <sub>50</sub> (nM) |
|-----------------------|----------------------------------------------------------------------------------|-----------------------|
| CHEMBL4284110         | <chem>CC#Cc1cncc(-c2ccc3c(c2)[C@@]2(COC(N)=N2)c2cc(C4=CCOCC4)ncc2O3)c1</chem>    | 0.31                  |
| CHEMBL4282964         | <chem>NC1=N[C@@]2(CO1)c1cc(-c3cncc(C#CC4CC4)c3)ccc1Oc1cnc(C3=CCOCC3)cc12</chem>  | 1.8                   |
| CHEMBL4276834         | <chem>CC#Cc1cncc(-c2ccc3c(c2)[C@@]2(COC(N)=N2)c2cc(C4=CCOCC4)ncc2O3)c1</chem>    | 0.46                  |
| CHEMBL4287483         | <chem>CC#Cc1cncc(-c2ccc3c(c2)[C@@]2(COC(N)=N2)c2cc(-c4ccnc(F)c4)ncc2O3)c1</chem> | 0.43                  |
| CHEMBL4285211         | <chem>NC1=N[C@@]2(CO1)c1cc(-c3cccc(F)n3)ccc1Oc1cnc(-c3ccnc(F)c3)cc12</chem>      | 0.92                  |
| CHEMBL4290822         | <chem>NC1=N[C@@]2(CO1)c1cc(-c3cncc(C#CCO)c3)ccc1Oc1cnc(C3=CCOCC3)cc12</chem>     | 0.58                  |
| CHEMBL4286331         | <chem>NC1=N[C@@]2(CO1)c1cc(NC(=O)c3ccc(Cl)cn3)ccc1Oc1cnc(C3CCOCC3)cc12</chem>    | 0.57                  |

Table S7. Comparison of this study with previous published works on AChE

| Year | Methods                                      | Molecular descriptors                                                                                            | Database                                                                           | QSAR Model performance                                                                                                                                                            | References                   |
|------|----------------------------------------------|------------------------------------------------------------------------------------------------------------------|------------------------------------------------------------------------------------|-----------------------------------------------------------------------------------------------------------------------------------------------------------------------------------|------------------------------|
| 2007 | PLS Regression using 3D-QSAR (COMFA)         | The steric and electrostatic fields; sp <sup>3</sup> carbon atom with a charge of +1; Lennard-Jones potential... | 38 phenyl pentenones                                                               | R <sup>2</sup> <sub>cv</sub> =0.629, non-cross-validated R <sup>2</sup> =0.972, SE=0.331, and F=72.41                                                                             | Liu <i>et al.</i> [1]        |
| 2008 | PLS Regression using 3D-QSAR (COMFA, COMSIA) | The steric and electrostatic fields; sp <sup>3</sup> carbon atom with a charge of +1; Lennard-Jones potential... | 78 chemically diverse molecules (aminoindanes, tetralenes and phenethyl amines)    | CoMFA q <sup>2</sup> = 0.733, r <sup>2</sup> = 0.967, predictive r <sup>2</sup> = 0.732, CoMSIA q <sup>2</sup> = 0.641, r <sup>2</sup> = 0.936, predictive r <sup>2</sup> = 0.812 | Roy <i>et al.</i> [2]        |
| 2009 | PLS Regression using 3D-QSAR (COMFA, COMSIA) | The steric and electrostatic fields; sp <sup>3</sup> carbon atom with a charge of +1; Lennard-Jones potential... | 52 carbamates                                                                      | COMFA: Q <sup>2</sup> <sub>LOO</sub> = 0.573 and R <sup>2</sup> = 0.972<br>COMSIA: Q <sup>2</sup> <sub>LOO</sub> = 0.723 and R <sup>2</sup> = 0.950                               | Chaudhaery <i>et al.</i> [3] |
| 2012 | Classification (SVM)                         | 211 ADRIANA.Code and 334 MOE descriptors                                                                         | 714 hAChE inhibitors                                                               | Matthews Correlation Coefficient (MCC) of 0.99 and a prediction accuracy (Q) of 99.66%<br>Model 1A: R <sup>2</sup> = 0.9; Q <sup>2</sup> = 0.9                                    | Wang <i>et al.</i> [4]       |
| 2012 | Support Vector Machine (SVM)                 | 1024 radial distribution functions (RDF) descriptors were calculated using ADRIANA.Code 2.2.2                    | 404 AChE inhibitors                                                                | Model 1B: R <sup>2</sup> = 0.9; Q <sup>2</sup> = 0.9<br>Model 2A: R <sup>2</sup> = 0.9; Q <sup>2</sup> = 0.91<br>Model 2B: R <sup>2</sup> = 0.9; Q <sup>2</sup> = 0.91            | Yan and Wang [5]             |
| 2012 | Stepwise multiple linear regression          | 24 docking descriptors (Glide score, Gold score, Chem score, ASP score, PMF score, and DOCK score)               | 91 molecules belonging to 9 different structural classes of heterocyclic compounds | The best model: R <sup>2</sup> = 0.938, Q <sup>2</sup> = 0.925, R <sup>2</sup> pred = 0.919, R <sup>2</sup> m(overall) = 0.936                                                    | Deb <i>et al.</i> [6]        |
| 2012 | PLS Regression using 3D-QSAR                 | Steric (Lennard-Jones 6–12 potential) field and electrostatic                                                    | 72 Tacrine-like inhibitors                                                         | CoMFA model: Q <sup>2</sup> = 0.686, R <sup>2</sup> = 0.948;<br>CoMSIA model:                                                                                                     | Chen <i>et al.</i> [7]       |

|      |                                                                                                                |                                                                                                                               |                                                                                 |                                                                                                                                                                                                       |                              |
|------|----------------------------------------------------------------------------------------------------------------|-------------------------------------------------------------------------------------------------------------------------------|---------------------------------------------------------------------------------|-------------------------------------------------------------------------------------------------------------------------------------------------------------------------------------------------------|------------------------------|
|      | (COMFA, COMSIA)                                                                                                | (Coulombic potential) field energies, sp <sup>3</sup> -carbon atom having a charge of +1 and a van der Waals radius of 1.52 Å |                                                                                 | Q <sup>2</sup> = 0.756, R <sup>2</sup> = 0.907                                                                                                                                                        |                              |
| 2013 | Least squares support vector regression (LS-SVR)                                                               | Energy and interaction descriptors by AutoDock 4.2 and BINDing ANALyzer (BINANA)                                              | 68 4-[(diethylamino)methyl]-phenol and 2,4-disubstituted pyrimidine derivatives | The best model: Q <sup>2</sup> = 0.790, R <sup>2</sup> = 0.860                                                                                                                                        | Gharaghani <i>et al.</i> [8] |
| 2013 | PLS Regression using 3D-QSAR (COMFA)                                                                           | The steric and electrostatic fields; sp <sup>3</sup> carbon atom with a charge of +1; Lennard-Jones potential...              | 41 oxoaporphine and oxoisoaporphine derivatives                                 | CoMFA model (Q <sup>2</sup> = 0.856 and R <sup>2</sup> = 0.986) test-set validation (Q <sup>2</sup> = 0.873, Q <sup>2</sup> = 0.937, and slope k = 0.902)                                             | Li <i>et al.</i> [9]         |
| 2014 | Stepwise multiple linear regression                                                                            | Dragon 2D-descriptors                                                                                                         | 10 datasets (92 Tacrine-like inhibitors)                                        | 10 QSAR models R <sup>2</sup> = 0.90-0.99; R <sup>2</sup> LOO = 0.84-7                                                                                                                                | Wong <i>et al.</i> [10]      |
| 2014 | Partial Least Square, G-QSAR model                                                                             | 2-D descriptors                                                                                                               | 27 flavonoid derivatives                                                        | Training set (R <sup>2</sup> = 0.8070, Q <sup>2</sup> = 0.7088); test set (pred_R <sup>2</sup> = 0.8131)                                                                                              | Vats <i>et al.</i> [11]      |
| 2015 | 3D-QSAR                                                                                                        | 3D-fingerprints                                                                                                               | 89 reversible and irreversible AChEIs                                           | Correlation value (R <sup>2</sup> = 0.93); cross-validated correlation coefficient (Q <sup>2</sup> = 0.89), and external validation results (n = 26, R <sup>2</sup> = 0.89, and MAE = 0.38 log units) | Lee and Barron [12]          |
| 2015 | PLS Regression using 3D-QSAR (COMFA, COMSIA)                                                                   | Steric and H-bond fields, and electrostatic fields                                                                            | 60 molecules                                                                    | CoMFA model: Q <sup>2</sup> = 0.552; R <sup>2</sup> = 0.983<br>CoMSIA model: Q <sup>2</sup> = 0.581 and R <sup>2</sup> = 0.989                                                                        | Zhou <i>et al.</i> [13]      |
| 2017 | Multiple Linear Regression (MLR), Genetic Function Approximation (GFA) and Multilayer Perceptron Network (MLP) | 2489 descriptors from the online program E-Dragon 1.0 and Molecular Operating Environment (MOE) software                      | 99 N-benzylpiperidine derivatives                                               | MLR: Q <sup>2</sup> = 0.831, R <sup>2</sup> = 0.843<br>MLP: Q <sup>2</sup> = 0.737, R <sup>2</sup> = 0.869<br>GFA: Q <sup>2</sup> = 0.842, R <sup>2</sup> = 0.875                                     | Bitam <i>et al.</i> [14]     |
| 2018 | Multiple linear regression (MLR)                                                                               | 10 descriptors by Hyperchem (version 8.0.8, Hypercube, Inc.), Gaussian 09 software                                            | 36 4-[(diethylamino)methyl]-phenol derivatives                                  | The best model: R <sup>2</sup> adj = 0.660 Q <sup>2</sup> = 0.70                                                                                                                                      | Daoud <i>et al.</i> [15]     |
| 2021 | Random forest (RF) classifier                                                                                  | 1665 Descriptors from DRAGON v5.4 software and 128 descriptors from Volsurf + v.1.04 software                                 | 6227 compounds in ChEMBL, 314 compounds in NPASS                                | True positive (TP) and true negative (TN) more than 0.8, AUC > 0.9                                                                                                                                    | López <i>et al.</i> [16]     |

|      |                                                                                |                                                                                                                                    |                                                                              |                                                                                                                                                                                                                                                            |                                         |
|------|--------------------------------------------------------------------------------|------------------------------------------------------------------------------------------------------------------------------------|------------------------------------------------------------------------------|------------------------------------------------------------------------------------------------------------------------------------------------------------------------------------------------------------------------------------------------------------|-----------------------------------------|
| 2022 | Support vector machine (SVM), k-nearest neighbor (k-NN) and random forest (RF) | 1444 descriptors (1D and 2D descriptors) of PaDEL software 245-bit fingerprints (166-bit MACCS key and 79-bit estate fingerprints) | 5692 molecules from ChEMBL                                                   | RF model: Accuracy = 0.84, MCC = 0.67<br>k-NN: Accuracy = 0.816, MCC = 0.62<br>SVM: Accuracy = 0.84, MCC = 0.67                                                                                                                                            | Sandhu <i>et al.</i> [17]               |
| 2022 | QSAR-SVM classification                                                        | 0-3D molecular descriptors of the DRAGON software                                                                                  | 1975 compounds                                                               | Accuracy of 88.63% for training set, 81.13% for cross-validation experiment and 81.15% for prediction set.<br>AChE models:<br>- 4 Rules with accuracy of 0.77-0.89<br>- 3 models: R <sup>2</sup> (training) = 0.85-0.87; Q <sup>2</sup> (test) = 0.83-0.86 | Cañizares-Carmenatea <i>et al.</i> [18] |
| 2023 | -Rule-of-Thumb<br>-Classification algorithms: CART, CHAID, and RF              | 1100 and 1151 0-2D descriptors calculated using Dragon 6.0                                                                         | ChEMBL data-bases including 1975 AChE in-hibitors and 1549 BACE1 in-hibitors |                                                                                                                                                                                                                                                            | Current study                           |

**Table S8.** Comparison of this study with previous published works on BACE1

| Year | Methods                                                                               | Molecular descriptors                                                                                            | Database                                              | QSAR Model performance                                                                                                                                                                       | References                     |
|------|---------------------------------------------------------------------------------------|------------------------------------------------------------------------------------------------------------------|-------------------------------------------------------|----------------------------------------------------------------------------------------------------------------------------------------------------------------------------------------------|--------------------------------|
| 2013 | CoMFA, CoMSIA, Partial least square (PLS)                                             | The steric and electrostatic fields; sp <sup>3</sup> carbon atom with a charge of +1; Lennard-Jones potential... | 106 compounds                                         | R <sup>2</sup> = 0.94 – 1.00, Q <sup>2</sup> = 0.73 – 0.79, R <sup>2</sup> <sub>pred</sub> = 0.71 – 0.80                                                                                     | Hossain <i>et al.</i> [19]     |
| 2014 | Multiple linear regression (MLR)                                                      | 2D descriptors and docking-based descriptors                                                                     | 50 structurally diverse BACE-1 inhibitors             | R <sup>2</sup> = 0.96, R <sup>2</sup> <sub>pred</sub> = 0.91                                                                                                                                 | Chakraborty <i>et al.</i> [20] |
| 2014 | Multiple linear regression (MLR)                                                      | 2D descriptors by DRAGON software 539 descriptors: constitutional, topological, geometrical,                     | 21 gallic acid derivatives                            | R <sup>2</sup> = 0.893, R <sup>2</sup> <sub>adj</sub> = 0.866, R <sup>2</sup> <sub>cv</sub> = 0.826                                                                                          | Gupta K. [21]                  |
| 2015 | Multi-parameter regression                                                            | electrostatics, quantum chemical, and thermodynamic descriptors calculated by CODESSA                            | 31 natural compounds                                  | R <sup>2</sup> <sub>cv</sub> = 0.85, R <sup>2</sup> = 0.89                                                                                                                                   | Das <i>et al.</i> [22]         |
| 2016 | Genetic algorithm (GA), multiple linear regression (MLR), partial least squares (PLS) | 644 2D descriptors employing Cerius 2 version 4.10, PaDEL Descriptor version 2.11, and Dragon 6 software         | 91 cyclic sulfone (or sulfoxide) hydroxyethylamines   | R <sup>2</sup> <sub>training</sub> = 0.8318, R <sup>2</sup> <sub>adj</sub> = 0.8135, Q <sup>2</sup> = 0.764, R <sup>2</sup> <sub>test</sub> = 0.8133, R <sup>2</sup> <sub>pred</sub> = 0.801 | Ambure and Roy [23]            |
| 2018 | CoMFA, CoMSIA, Partial least square (PLS)                                             | Steric and H-bond fields, and electrostatic fields                                                               | 41 molecules of biaryl aminothiazine BACE1 inhibitors | Q <sup>2</sup> > 0.5                                                                                                                                                                         | Liu <i>et al.</i> [24]         |

|      |                                                                                                                                                                              |                                                                         |                                                                            |                                                                                                                                      |                               |
|------|------------------------------------------------------------------------------------------------------------------------------------------------------------------------------|-------------------------------------------------------------------------|----------------------------------------------------------------------------|--------------------------------------------------------------------------------------------------------------------------------------|-------------------------------|
| 2019 | Partial least squares (PLS)                                                                                                                                                  | 284 Topological, Physicochemical, and geometric descriptors             | 18 compounds                                                               | $R^2 = 0.9738$ , $R^2_{\text{pred}} = 0.898$ , $Q^2_{\text{LOOCV}} = 0.898$ , $Q^2_{\text{test}} = 0.6057$                           | Joseph <i>et al.</i> [25]     |
| 2019 | Partial least square regression (PLS-R) and Artificial Neural Network (ANN)                                                                                                  | 327 molecular descriptors calculated using QuaSAR module of MOE package | 35 isonicotinamides derivatives                                            | $R^2_{\text{PLS-R}} = 0.84$ , $R^2_{\text{adj}} (\text{PLS-R}) = 0.82$ , $R^2_{\text{ANN}} = 0.8 - 0.9$                              | El Aissouq <i>et al.</i> [26] |
| 2020 | Multiple linear regression (MLR) Naïve Bayesian (NB), nearest known neighbours (kNN), support vector machine (SVM), random forest (RF) and gradient-boosted algorithms (XGB) | molecular weight, LogP and polarizability                               | 34 known inhibitors of BACE1                                               | $R^2 = 0.9992$ , $R^2_{\text{adj}} = 0.9969$                                                                                         | Chetia <i>et al.</i> [27]     |
| 2021 | GA-MLR (Genetic Algorithm-Multi-linear Regression)                                                                                                                           | 2 types of descriptors: molecular property and fingerprints             | 3536 diverse BACE1 inhibitors                                              | $F1_{\text{NB}} = 0.74$ , $F1_{\text{kNN}} = 0.85$ , $F1_{\text{SVM}} = 0.86$ , $F1_{\text{RF}} = 0.87$ and $F1_{\text{XGB}} = 0.87$ | Singh <i>et al.</i> [28]      |
| 2022 |                                                                                                                                                                              | 3,281 molecular descriptors                                             | 552 molecules from ChEMBL database                                         | $R^2 = 0.82$ , $R^2_{\text{adj}} = 0.8168$ , $Q^2_{\text{LOO}} = 0.81$                                                               | Mukerjee <i>et al.</i> [29]   |
| 2023 | -Rule-of-Thumb<br>-Classification algorithms: CART, CHAID, and RF                                                                                                            | 1100 and 1151 0-2D descriptors calculated using Dragon 6.0              | ChEMBL data-bases including 1975 AChE inhibitors and 1549 BACE1 inhibitors | BACE1 models:<br>- 3 Rules with accuracy of 0.75-0.98<br>- 3 models: $R^2$ (training) = 0.82-0.85; $Q^2$ (test) = 0.80-0.83          | Current study                 |

## References

- Liu, A.; Guang, H.; Zhu, L.; Du, G.; Lee, S.M.Y.; Wang, Y. 3D-QSAR analysis of a new type of acetylcholinesterase inhibitors. *Sci. China C. Life Sci.* **2007**, *50*, 726-730. <https://doi.org/10.1007/s11427-007-0094-1>.
- Roy, K.K.; Dixit, A.; Saxena, A.K. An investigation of structurally diverse carbamates for acetylcholinesterase (AChE) inhibition using 3D-QSAR analysis. *J. Mol. Graph. Model.* **2008**, *27*, 197-208. <https://doi.org/10.1016/j.jmgm.2008.04.006>.
- Chaudhaery, S.S.; Roy, K.K.; Saxena, A.K. Consensus Superiority of the Pharmacophore-Based Alignment, Over Maximum Common Substructure (MCS): 3D-QSAR Studies on Carbamates as Acetylcholinesterase Inhibitors. *J. Chem. Inf. Model.* **2009**, *49*, 1590-1601. <https://doi.org/10.1021/ci900049e>.
- Wang, K.; Hu, X.; Wang, Z.; Yan, A. Classification of Acetylcholinesterase Inhibitors and Decoys by a Support Vector Machine. *Comb. Chem. High Throughput Screen.* **2012**, *15*, 492-502. <http://dx.doi.org/10.2174/138620712800563891>.
- Yan, A.; Wang, K. Quantitative structure and bioactivity relationship study on human acetylcholinesterase inhibitors. *Bioorg. Med. Chem. Lett.* **2012**, *22*, 3336-3342. <https://doi.org/10.1016/j.bmcl.2012.02.108>.
- Deb, P.K.; Sharma, A.; Piplani, P.; Akkinepally, R.R. Molecular docking and receptor-specific 3D-QSAR studies of acetylcholinesterase inhibitors. *Mol. Divers.* **2012**, *16*, 803-823. <https://doi.org/10.1007/s11030-012-9394-x>.
- Chen, N.; Liu, C.; Zhao, L.; Zhang, H. 3D-QSAR study of multi-target-directed AChE inhibitors based on autodocking. *Med. Chem. Res.* **2012**, *21*, 245-256. <https://doi.org/10.1007/s00044-010-9516-x>.
- Gharaghani, S.; Khayamian, T.; Ebrahimi, M. Molecular dynamics simulation study and molecular docking descriptors in structure-based QSAR on acetylcholinesterase (AChE) inhibitors. *SAR QSAR Environ. Res.* **2013**, *24*, 773-794. <https://doi.org/10.1080/1062936X.2013.792877>.
- Li, Y.-P.; Weng, X.; Ning, F.-X.; Ou, J.-B.; Hou, J.-Q.; Luo, H.-B.; Li, D.; Huang, Z.-S.; Huang, S.-L.; Gu, L.-Q. 3D-QSAR studies of azaoxoisoaporphine, oxoaporphine, and oxoisoaporphine derivatives as anti-AChE and anti-AD agents by the CoMFA method. *J. Mol. Graph. Model.* **2013**, *41*, 61-67. <https://doi.org/10.1016/j.jmgm.2013.02.003>.
- Wong, K.Y.; Mercader, A.G.; Saavedra, L.M.; Honarparvar, B.; Romanelli, G.P.; Duchowicz, P.R. QSAR analysis on tacrine-related acetylcholinesterase inhibitors. *Journal of biomedical science* **2014**, *21*, 84. 10.1186/s12929-014-0084-0.

11. Vats, C.; Dhanjal, J.K.; Goyal, S.; Bharadvaja, N.; Grover, A. Computational design of novel flavonoid analogues as potential AChE inhibitors: analysis using group-based QSAR, molecular docking and molecular dynamics simulations. *Struct. Chem.* **2015**, *26*, 467-476. <https://doi.org/10.1007/s11224-014-0494-3>.
12. Lee, S.; Barron, M.G. Development of 3D-QSAR Model for Acetylcholinesterase Inhibitors Using a Combination of Fingerprint, Molecular Docking, and Structure-Based Pharmacophore Approaches. *Toxicol. Sci.* **2015**, *148*, 60-70. <https://doi.org/10.1093/toxsci/kfv160>.
13. Zhou, A.; Hu, J.; Wang, L.; Zhong, G.; Pan, J.; Wu, Z.; Hui, A. Combined 3D-QSAR, molecular docking, and molecular dynamics study of tacrine derivatives as potential acetylcholinesterase (AChE) inhibitors of Alzheimer's disease. *J. Mol. Model.* **2015**, *21*, 277. [10.1007/s00894-015-2797-8](https://doi.org/10.1007/s00894-015-2797-8).
14. Bitam, S.; Hamadache, M.; Hanini, S. QSAR model for prediction of the therapeutic potency of N-benzylpiperidine derivatives as AChE inhibitors. *SAR QSAR Environ. Res.* **2017**, *28*, 471-489. <https://doi.org/10.1080/1062936X.2017.1331467>.
15. Daoud, I.; Melkemi, N.; Salah, T.; Ghalem, S. Combined QSAR, molecular docking and molecular dynamics study on new Acetylcholinesterase and Butyrylcholinesterase inhibitors. *Comput. Biol. Chem.* **2018**, *74*, 304-326. <https://doi.org/10.1016/j.compbiolchem.2018.03.021>.
16. López, A.F.F.; Martínez, O.M.M.; Hernández, H.F.C. Evaluation of Amaryllidaceae alkaloids as inhibitors of human acetylcholinesterase by QSAR analysis and molecular docking. *J. Mol. Struct.* **2021**, *1225*, 129142. <https://doi.org/10.1016/j.molstruc.2020.129142>.
17. Sandhu, H.; Kumar, R.N.; Garg, P. Machine learning-based modeling to predict inhibitors of acetylcholinesterase. *Mol. Divers.* **2022**, *26*, 331-340. <https://doi.org/10.1007/s11030-021-10223-5>.
18. Cañizares-Carmenate, Y.; Nam, N.H.; Díaz-Amador, R.; Thuan, N.T.; Dung, P.T.P.; Torrens, F.; Pham-The, H.; Perez-Gimenez, F.; Castillo-Garit, J.A. Ligand-based discovery of new potential acetylcholinesterase inhibitors for Alzheimer's disease treatment. *SAR QSAR Environ. Res.* **2022**, *33*, 49-61. <https://doi.org/10.1080/1062936X.2022.2025615>.
19. Hossain, T.; Islam, M.A.; Pal, R.; Saha, A. Exploring structural requirement and binding interactions of  $\beta$ -amyloid cleavage enzyme inhibitors using molecular modeling techniques. *Med. Chem. Res.* **2013**, *22*, 4766-4774. <https://doi.org/10.1007/s00044-013-0481-z>.
20. Chakraborty, S.; Ramachandran, B.; Basu, S. Encompassing receptor flexibility in virtual screening using ensemble docking-based hybrid QSAR: discovery of novel phytochemicals for BACE1 inhibition. *Mol. Biosyst.* **2014**, *10*, 2684-2692. <https://doi.org/10.1039/C4MB00307A>.
21. Gupta, K. QSAR Studies on Gallic Acid Derivatives and Molecular Docking Studies of Bace1 Enzyme – A Potent Target of Alzheimer Disease. *J. Biosci. Bioeng.* **2014**, *1*, 11-27.
22. Das, S.; Majumder, T.; Sarkar, A.; Mukherjee, P.; Basu, S. Flavonoids as BACE1 inhibitors: QSAR modelling, screening and in vitro evaluation. *Int. J. Biol. Macromol.* **2020**, *165*, 1323-1330. <https://doi.org/10.1016/j.ijbiomac.2020.09.232>.
23. Ambure, P.; Roy, K. Understanding the structural requirements of cyclic sulfone hydroxyethylamines as hBACE1 inhibitors against A $\beta$  plaques in Alzheimer's disease: a predictive QSAR approach. *RSC Adv.* **2016**, *6*, 28171-28186. <https://doi.org/10.1039/C6RA04104C>.
24. Liu, J.; Ni, J.; Wang, X.; Bi, Y. 3D-QSAR Analysis and Molecular Docking Study on Biaryl Amino-thiazine BACE1 Inhibitor. *China Pharm.* **2018**, *12*, 1335-1339.
25. Joseph, O.A.; Babatomiwa, K.; Niyi, A.; Olaposi, O.; Olumide, I. Molecular Docking and 3D Qsar Studies of C000000956 as a Potent Inhibitor of Bace-1. *Drug Res. (Stuttg)* **2019**, *69*, 451-457. <https://doi.org/10.1055/a-0849-9377>.
26. Aissouq, A.E.; Toufik, H.; Lamchouri, F.; Stitou, M.; Ouammou, A. QSAR study of isonicotinamides derivatives as Alzheimer's disease inhibitors using PLS-R and ANN methods. In Proceedings of the 2019 International Conference on Intelligent Systems and Advanced Computing Sciences (ISACS), 26-27 Dec. 2019, 2019; pp. 1-7.
27. Chetia, P.; Mazumder, M.K.; Mahanta, S.; De, B.; Dutta Choudhury, M. A novel phytochemical from *Dipteris wallichii* inhibits human  $\beta$ -secretase 1: Implications for the treatment of Alzheimer's disease. *Med. Hypotheses* **2020**, *143*, 109839. <https://doi.org/10.1016/j.mehy.2020.109839>.
28. Singh, R.; Ganeshpurkar, A.; Ghosh, P.; Pokle, A.V.; Kumar, D.; Singh, R.b.; Singh, S.K.; Kumar, A. Classification of beta-site amyloid precursor protein cleaving enzyme 1 inhibitors by using machine learning methods. *Chem. Biol. Drug Des.* **2021**, *98*, 1079-1097. <https://doi.org/10.1111/cbdd.13965>.
29. Mukerjee, N.; Das, A.; Jawarkar, R.D.; Maitra, S.; Das, P.; Castrosanto, M.A.; Paul, S.; Samad, A.; Zaki, M.E.A.; Al-Hussain, S.A.; et al. Repurposing food molecules as a potential BACE1 inhibitor for Alzheimer's disease. *Front. Aging Neurosci.* **2022**, *14*. <https://doi.org/10.3389/fnagi.2022.878276>.
